# Supplementary material for: Meta-genomic analysis of toilet waste from long distance flights; a step towards global surveillance of infectious diseases and antimicrobial resistance
Source: Sci Rep. 2015 Jul 10;5:11444. doi: 10.1038/srep11444 (PMC4498435; doi:10.1038/srep11444)
Supplement: Supplementary Information [file srep11444-s1.pdf]

Meta-genomic analysis of toilet waste from long distance flights; a step towards global surveillance of infectious diseases and antimicrobial resistance

Thomas Nordahl Petersen, Simon Rasmussen, Henrik Hasman, Christian Carøe, Jacob Bælum, Anna Charlotte Schultz, Lasse Bergmark, Christina A. Svendsen, Ole Lund, Thomas Sicheritz-Pontén, Frank M. Aarestrup

**Supplementary tables and figures**

| Sample       | Number of bases (x10 <sup>9</sup> ) | Number of raw reads | Cutadapt  | Reads in Common | notPhiX   |
|--------------|-------------------------------------|---------------------|-----------|-----------------|-----------|
| China 2      | 17.4                                | 176183176           | 166353451 | 160021618       | 159902260 |
| China 3      | 16.6                                | 167573470           | 158336651 | 145039758       | 144894876 |
| Japan 2      | 15.0                                | 151194708           | 143094819 | 127687760       | 127602782 |
| Japan 3      | 17.8                                | 179736146           | 170510914 | 164240716       | 164129358 |
| Thailand 1   | 16.1                                | 162510852           | 153198042 | 147386846       | 147264464 |
| Thailand 2   | 22.7                                | 228801518           | 216277032 | 204363784       | 204165396 |
| Thailand 3   | 19.1                                | 192754118           | 182230002 | 175241558       | 175078598 |
| Singapore 2  | 14.8                                | 149414266           | 141035981 | 135471138       | 135358600 |
| Singapore 3  | 24.0                                | 242276662           | 229620624 | 221236902       | 221064678 |
| Greenland 2  | 16.7                                | 168841036           | 159198587 | 145741288       | 145659526 |
| Pakistan 2   | 25.7                                | 259510838           | 243839457 | 226438106       | 226096876 |
| Newark 1     | 19.0                                | 191612966           | 179508252 | 172032622       | 171893198 |
| Newark 2     | 18.5                                | 187186964           | 176830027 | 166282122       | 166088144 |
| Newark 3     | 20.1                                | 203297524           | 192958099 | 185951916       | 185826762 |
| Washington 1 | 20.6                                | 207817972           | 194759326 | 186776622       | 186560962 |
| Washington 2 | 16.1                                | 162990704           | 153105589 | 147024384       | 146865532 |
| Washington 3 | 19.6                                | 198276096           | 187229170 | 179925000       | 179782256 |
| Toronto 1    | 15.9                                | 161044874           | 152006390 | 146162322       | 145976034 |

Supplementary Table 1. Raw reads are the initial read count before processing. Column 'Cutadapt' are the read count after trimming and adaptor removal. 'Reads in Common' are number paired reads that remain after the cutadapt trimming process. Last column 'notPhiX' are the number of reads that remain after removing reads that map to PhiX174 reference sequences.

| Database name   | Download information                                                                                                                                    |
|-----------------|---------------------------------------------------------------------------------------------------------------------------------------------------------|
| ResFinder       | <a href="http://cge.cbs.dtu.dk/services/data.php">http://cge.cbs.dtu.dk/services/data.php</a>                                                           |
| MetaHitAssembly | <a href="http://www.ncbi.nlm.nih.gov/nuccore/?term=PRJEB674">http://www.ncbi.nlm.nih.gov/nuccore/?term=PRJEB674</a> (PRJEB674 - PRJEB1046)              |
| Bacteria        | <a href="ftp://ftp.ncbi.nih.gov/genomes/Bacteria">ftp://ftp.ncbi.nih.gov/genomes/Bacteria</a> <sup>1</sup>                                              |
| Plamid          | <a href="ftp://ftp.ncbi.nih.gov/genomes/Bacteria">ftp://ftp.ncbi.nih.gov/genomes/Bacteria</a> <sup>2</sup>                                              |
| Human           | Human genome ver. GRCh37.p13                                                                                                                            |
| Invertebrates   | <a href="ftp://ftp.ncbi.nlm.nih.gov/genbank/genomes/Eukaryotes/invertebrates/">ftp://ftp.ncbi.nlm.nih.gov/genbank/genomes/Eukaryotes/invertebrates/</a> |
| Protozoa        | <a href="ftp://ftp.ncbi.nlm.nih.gov/genbank/genomes/Eukaryotes/protozoa">ftp://ftp.ncbi.nlm.nih.gov/genbank/genomes/Eukaryotes/protozoa</a>             |
| Virus           | <a href="ftp://ftp.ncbi.nih.gov/genomes/virus">ftp://ftp.ncbi.nih.gov/genomes/virus</a>                                                                 |

Supplementary Table 2. Download of reference sequence data. Reference sequence information can be obtained from the url's shown in 'Download information'. <sup>1</sup> Only entries representing bacteria. <sup>2</sup> Only entries representing plasmids.

| Sample       | Percentage of reads mapped to reference sequence databases |          |         |       |          |           |
|--------------|------------------------------------------------------------|----------|---------|-------|----------|-----------|
|              | MetaHit-Assembly                                           | Bacteria | Plasmid | Human | Unmapped | ResFinder |
| China 2      | 50.2                                                       | 9.7      | 0.13    | 0.08  | 39.8     | 0.06      |
| China 3      | 50.0                                                       | 9.7      | 0.12    | 0.06  | 40.2     | 0.07      |
| Japan 2      | 43.6                                                       | 8.7      | 0.17    | 0.27  | 47.2     | 0.07      |
| Japan 3      | 50.0                                                       | 7.8      | 0.16    | 0.18  | 42.0     | 0.07      |
| Thailand 1   | 53.6                                                       | 8.2      | 0.25    | 0.11  | 37.8     | 0.08      |
| Thailand 2   | 46.3                                                       | 8.5      | 0.20    | 0.12  | 44.9     | 0.07      |
| Thailand 3   | 50.7                                                       | 8.9      | 0.18    | 0.11  | 40.1     | 0.07      |
| Singapore 2  | 47.8                                                       | 8.9      | 0.19    | 0.18  | 42.9     | 0.06      |
| Singapore 3  | 46.3                                                       | 8.6      | 0.18    | 0.07  | 44.8     | 0.07      |
| Greenland 2  | 49.7                                                       | 9.8      | 0.15    | 0.12  | 40.2     | 0.04      |
| Pakistan 2   | 38.4                                                       | 8.5      | 0.11    | 0.06  | 52.9     | 0.07      |
| Newark 1     | 49.6                                                       | 9.0      | 0.21    | 1.44  | 39.7     | 0.06      |
| Newark 2     | 46.4                                                       | 9.3      | 0.11    | 0.26  | 43.9     | 0.05      |
| Newark 3     | 46.8                                                       | 9.0      | 0.17    | 0.23  | 43.9     | 0.07      |
| Washington 1 | 53.8                                                       | 9.6      | 0.21    | 0.28  | 36.1     | 0.05      |
| Washington 2 | 49.2                                                       | 8.8      | 0.13    | 0.44  | 41.5     | 0.05      |
| Washington 3 | 51.1                                                       | 9.8      | 0.18    | 0.13  | 38.7     | 0.06      |
| Toronto 1    | 53.5                                                       | 9.7      | 0.18    | 0.21  | 36.3     | 0.06      |
| Average      | 48.7                                                       | 9.0      | 0.17    | 0.24  | 41.8     | 0.06      |

Supplementary Table 3. Mapping statistics for a subset of the databases is shown in table S3. A limited amount of reads mapped to the Invertebrates, Protozoa and Virus databases and therefore percentages are only shown for the databases MetaHitAssembly, Bacteria, Plasmid and Human. Columns show the samples names, followed by reference sequence database names to which the majority of reads could be assigned. The ResFinder database contains all the resistance gene sequences and here mapping was performed in Fullmode whereas Chainmode mapping was utilized for the MetaHitAssembly, Bacteria, Plasmid and Human databases. The column ‘Unmapped’ shows the percentage of reads that could not be assigned to any database where mapping was performed in Chainmode. The average percentage of reads is shown in the last row. For each of the samples a percentage of 100 correspond to the number of reads shown in column notPhiX in table S1.

|              | Absolute number of reads mapped to reference sequence databases |          |         |         |           |           |
|--------------|-----------------------------------------------------------------|----------|---------|---------|-----------|-----------|
| Sample       | MetaHit-Assembly                                                | Bacteria | Plasmid | Human   | Unmapped  | ResFinder |
| China 2      | 80323500                                                        | 15515220 | 215430  | 135820  | 63694722  | 98706     |
| China 3      | 72390218                                                        | 14036912 | 177150  | 91874   | 58183832  | 101608    |
| Japan 2      | 55633018                                                        | 11155040 | 213518  | 344970  | 60241062  | 84290     |
| Japan 3      | 81960564                                                        | 12826418 | 269454  | 294936  | 68760230  | 117862    |
| Thailand 1   | 78957422                                                        | 12074186 | 367200  | 159932  | 55673498  | 113584    |
| Thailand 2   | 94506024                                                        | 17290900 | 410892  | 250448  | 91666392  | 152968    |
| Thailand 3   | 88750766                                                        | 15612290 | 316184  | 191068  | 70189794  | 119574    |
| Singapore 2  | 64756198                                                        | 12046278 | 252648  | 248766  | 58038434  | 79668     |
| Singapore 3  | 102443028                                                       | 19063912 | 396624  | 144494  | 98989104  | 155192    |
| Greenland 2  | 72416918                                                        | 14296084 | 225100  | 169492  | 58536814  | 62564     |
| Pakistan 2   | 86911454                                                        | 19262526 | 256710  | 136856  | 119488044 | 163114    |
| Newark 1     | 85279992                                                        | 15430798 | 364226  | 2473606 | 68305746  | 99294     |
| Newark 2     | 77076030                                                        | 15484890 | 177812  | 439452  | 72884144  | 85662     |
| Newark 3     | 86873034                                                        | 16684544 | 314088  | 422006  | 81512582  | 129516    |
| Washington 1 | 100336712                                                       | 17923640 | 395424  | 517998  | 67364284  | 96598     |
| Washington 2 | 72222900                                                        | 12864702 | 190294  | 651308  | 60918552  | 71606     |
| Washington 3 | 91944290                                                        | 17688794 | 330644  | 227124  | 69572606  | 105200    |
| Toronto 1    | 78108170                                                        | 14223790 | 270036  | 303910  | 53049342  | 86104     |
| Average      | 81716124                                                        | 15193385 | 285746  | 400226  | 70948288  | 106839    |

Supplementary Table 4. Columns show the samples names, followed by reference sequence database names to which the majority of reads could be assigned.

Supplementary Table 5: Normalised mean abundance and p-values and foldchange for comparison between different origins  
 NAM: North America; SEA: South Asia; EA: North-East Asia; AA: Asia (Sort and North-East Asia combined)

| Gene           | Normalized mean abundance |        |        |        | p-value for comparison |         |         |          | Foldchange for comparison |          |          |           |
|----------------|---------------------------|--------|--------|--------|------------------------|---------|---------|----------|---------------------------|----------|----------|-----------|
|                | cNAM                      | cSEA   | cEA    | cAA    | pAA_NAM                | pSEA_EA | pEA_NAM | pSEA_NAM | fcAA_NAM                  | fcSEA_EA | fcEA_NAM | fcSEA_NAM |
| aac(3)-I       | 2,5                       | 1,4    | 1,6    | 1,5    | 0,217                  | 0,909   | 0,437   | 0,262    | 0,6                       | 0,9      | 0,6      | 0,6       |
| aac(3)-Ib-aac  | 2,8                       | 8,7    | 1,3    | 5,8    | 0,964                  | 0,240   | 0,549   | 0,755    | 2,0                       | 6,8      | 0,5      | 3,1       |
| aac(3)-II      | 8,2                       | 38,2   | 6,0    | 25,3   | 0,184                  | 0,199   | 0,587   | 0,139    | 3,1                       | 6,4      | 0,7      | 4,7       |
| aac(3)-IV      | 0,3                       | 1,4    | 0,0    | 0,8    | 0,732                  | 0,287   | 0,596   | 0,419    | 2,9                       | Inf      | 0,0      | 4,8       |
| aac(3)-VI      | 0,2                       | 0,9    | 0,5    | 0,7    | 0,632                  | 1,000   | 0,602   | 0,832    | 3,3                       | 1,7      | 2,3      | 3,9       |
| aac(6')-aph(2  | 200,0                     | 385,9  | 1140,7 | 687,8  | 0,027                  | 0,114   | 0,008   | 0,228    | 3,4                       | 0,3      | 5,7      | 1,9       |
| aac(6')-I      | 18,4                      | 24,2   | 21,9   | 23,3   | 0,829                  | 0,914   | 0,683   | 1,000    | 1,3                       | 1,1      | 1,2      | 1,3       |
| aac(6')-II     | 28,1                      | 67,6   | 17,5   | 47,6   | 0,897                  | 0,257   | 0,214   | 0,491    | 1,7                       | 3,9      | 0,6      | 2,4       |
| aac(6')I       | 7,9                       | 26,5   | 1,1    | 16,3   | 0,503                  | 0,042   | 0,342   | 0,081    | 2,1                       | 24,7     | 0,1      | 3,4       |
| aadA           | 1069,2                    | 1814,8 | 1011,8 | 1493,6 | 0,360                  | 0,038   | 0,933   | 0,142    | 1,4                       | 1,8      | 0,9      | 1,7       |
| aadB           | 9,1                       | 17,9   | 24,4   | 20,5   | 0,173                  | 0,352   | 0,048   | 0,662    | 2,3                       | 0,7      | 2,7      | 2,0       |
| aadD           | 9,4                       | 13,4   | 85,7   | 42,3   | 0,396                  | 0,069   | 0,014   | 0,557    | 4,5                       | 0,2      | 9,1      | 1,4       |
| ant(3'')-Ih-aa | 14,4                      | 40,2   | 9,5    | 27,9   | 0,237                  | 0,010   | 0,570   | 0,020    | 1,9                       | 4,2      | 0,7      | 2,8       |
| ant(6)-I       | 157,5                     | 316,9  | 119,2  | 237,8  | 0,515                  | 0,010   | 0,109   | 0,020    | 1,5                       | 2,7      | 0,8      | 2,0       |
| ant(9)-I       | 0,2                       | 2,4    | 0,0    | 1,5    | 1,000                  | 0,540   | 0,596   | 0,832    | 6,6                       | Inf      | 0,0      | 11,0      |
| aph(2'')-I     | 28,1                      | 21,0   | 23,5   | 22,0   | 0,315                  | 0,762   | 0,683   | 0,282    | 0,8                       | 0,9      | 0,8      | 0,7       |
| aph(3')-I      | 20,2                      | 54,4   | 26,3   | 43,2   | 0,012                  | 0,114   | 0,109   | 0,020    | 2,1                       | 2,1      | 1,3      | 2,7       |
| aph(3')-II     | 2,4                       | 9,9    | 1,8    | 6,7    | 0,094                  | 0,087   | 0,428   | 0,075    | 2,7                       | 5,5      | 0,7      | 4,1       |
| aph(3')-III    | 400,7                     | 1258,3 | 340,8  | 891,3  | 0,360                  | 0,038   | 0,461   | 0,043    | 2,2                       | 3,7      | 0,9      | 3,1       |
| aph(3')-VI     | 2,1                       | 0,3    | 0,0    | 0,2    | 0,871                  | 0,540   | 0,596   | 1,000    | 0,1                       | Inf      | 0,0      | 0,1       |
| aph(3')-VII    | 0,2                       | 0,4    | 1,5    | 0,8    | 0,329                  | 0,359   | 0,147   | 0,832    | 3,5                       | 0,2      | 6,5      | 1,5       |
| aph(3')-XV     | 4,5                       | 0,6    | 0,6    | 0,6    | 0,015                  | 1,000   | 0,094   | 0,037    | 0,1                       | 1,0      | 0,1      | 0,1       |
| aph(4)-I       | 1,1                       | 2,8    | 2,8    | 2,8    | 0,779                  | 0,896   | 0,911   | 0,808    | 2,5                       | 1,0      | 2,5      | 2,5       |
| aph(6)-I       | 2,9                       | 1,5    | 1,0    | 1,3    | 0,733                  | 0,719   | 1,000   | 0,617    | 0,5                       | 1,5      | 0,3      | 0,5       |
| apmA           | 0,2                       | 0,0    | 0,0    | 0,0    | 0,314                  | NA      | 0,596   | 0,470    | 0,0                       | NA       | 0,0      | 0,0       |
| ARR            | 39,1                      | 83,2   | 28,3   | 61,2   | 0,315                  | 0,019   | 0,808   | 0,081    | 1,6                       | 2,9      | 0,7      | 2,1       |
| blaACC         | 0,3                       | 0,0    | 0,0    | 0,0    | 0,314                  | NA      | 0,596   | 0,470    | 0,0                       | NA       | 0,0      | 0,0       |
| blaACI         | 36,1                      | 172,2  | 41,0   | 119,7  | 0,173                  | 0,171   | 0,808   | 0,020    | 3,3                       | 4,2      | 1,1      | 4,8       |
| blaACT         | 9,8                       | 10,7   | 1,8    | 7,1    | 0,689                  | 0,165   | 0,200   | 0,755    | 0,7                       | 5,8      | 0,2      | 1,1       |
| blaADC         | 0,5                       | 0,0    | 0,0    | 0,0    | 0,122                  | NA      | 0,361   | 0,244    | 0,0                       | NA       | 0,0      | 0,0       |
| blaBIL         | 0,0                       | 0,6    | 0,0    | 0,4    | 0,222                  | 0,287   | NA      | 0,112    | Inf                       | Inf      | NA       | Inf       |
| blaCARB        | 370,6                     | 477,7  | 416,6  | 453,3  | 0,408                  | 0,914   | 0,570   | 0,491    | 1,2                       | 1,1      | 1,1      | 1,3       |
| blaCFE         | 0,3                       | 0,7    | 0,7    | 0,7    | 0,393                  | 1,000   | 0,602   | 0,419    | 2,6                       | 1,0      | 2,5      | 2,6       |
| blaCKO         | 0,2                       | 0,3    | 0,0    | 0,2    | 0,871                  | 0,540   | 0,596   | 1,000    | 0,8                       | Inf      | 0,0      | 1,3       |
| blaCMG         | 0,5                       | 0,6    | 0,0    | 0,4    | 0,837                  | 0,287   | 0,596   | 0,530    | 0,7                       | Inf      | 0,0      | 1,2       |
| blaCMY         | 6,9                       | 76,6   | 6,1    | 48,4   | 0,146                  | 0,257   | 0,570   | 0,108    | 7,1                       | 12,5     | 0,9      | 11,2      |
| blaCTX-M       | 2,2                       | 57,1   | 5,0    | 36,3   | 0,020                  | 0,171   | 0,218   | 0,013    | 16,5                      | 11,3     | 2,3      | 26,0      |
| blaDES         | 0,0                       | 0,4    | 0,0    | 0,2    | 0,434                  | 0,540   | NA      | 0,312    | Inf                       | Inf      | NA       | Inf       |
| blaDHA         | 11,6                      | 25,0   | 4,0    | 16,6   | 0,197                  | 0,914   | 0,214   | 0,401    | 1,4                       | 6,3      | 0,3      | 2,2       |
| blaGES         | 0,0                       | 0,3    | 0,0    | 0,2    | 0,434                  | 0,540   | NA      | 0,312    | Inf                       | Inf      | NA       | Inf       |
| blaIMP         | 0,2                       | 0,0    | 0,0    | 0,0    | 0,314                  | NA      | 0,596   | 0,470    | 0,0                       | NA       | 0,0      | 0,0       |
| blaL           | 0,5                       | 1,1    | 0,0    | 0,6    | 1,000                  | 0,540   | 0,596   | 0,832    | 1,2                       | Inf      | 0,0      | 2,0       |
| blaLAT         | 0,0                       | 0,3    | 0,0    | 0,2    | 0,434                  | 0,540   | NA      | 0,312    | Inf                       | Inf      | NA       | Inf       |
| blaLEN         | 9,2                       | 1,6    | 1,1    | 1,4    | 0,486                  | 0,741   | 0,526   | 0,638    | 0,1                       | 1,5      | 0,1      | 0,2       |
| blaMAL         | 0,0                       | 0,3    | 0,0    | 0,2    | 0,434                  | 0,540   | NA      | 0,312    | Inf                       | Inf      | NA       | Inf       |
| blaMIR         | 0,5                       | 2,7    | 0,0    | 1,6    | 0,315                  | 0,072   | 0,361   | 0,054    | 3,5                       | Inf      | 0,0      | 5,8       |
| blaMOR         | 0,2                       | 2,9    | 0,7    | 2,0    | 0,329                  | 0,694   | 0,602   | 0,323    | 9,3                       | 4,0      | 3,3      | 13,3      |
| blaMOX         | 0,0                       | 0,7    | 0,0    | 0,4    | 0,434                  | 0,540   | NA      | 0,312    | Inf                       | Inf      | NA       | Inf       |
| blaMUS         | 0,3                       | 0,0    | 0,0    | 0,0    | 0,314                  | NA      | 0,596   | 0,470    | 0,0                       | NA       | 0,0      | 0,0       |
| blaNPS         | 0,3                       | 0,4    | 0,0    | 0,2    | 0,871                  | 0,540   | 0,596   | 1,000    | 0,8                       | Inf      | 0,0      | 1,3       |
| blaOCH         | 0,0                       | 0,3    | 0,0    | 0,2    | 0,434                  | 0,540   | NA      | 0,312    | Inf                       | Inf      | NA       | Inf       |
| blaOKP-A       | 0,0                       | 0,7    | 0,0    | 0,4    | 0,222                  | 0,287   | NA      | 0,112    | Inf                       | Inf      | NA       | Inf       |
| blaOKP-B       | 0,7                       | 3,2    | 1,1    | 2,3    | 0,141                  | 0,450   | 0,613   | 0,085    | 3,3                       | 3,0      | 1,5      | 4,5       |
| blaOXA         | 595,6                     | 1253,7 | 847,6  | 1091,2 | 0,012                  | 0,171   | 0,214   | 0,008    | 1,8                       | 1,5      | 1,4      | 2,1       |
| blaOXY         | 0,3                       | 3,3    | 0,5    | 2,2    | 0,138                  | 0,211   | 0,794   | 0,060    | 7,7                       | 6,5      | 1,8      | 11,7      |
| blaPAO         | 0,0                       | 0,7    | 0,0    | 0,4    | 0,434                  | 0,540   | NA      | 0,312    | Inf                       | Inf      | NA       | Inf       |
| blaPME         | 0,0                       | 0,9    | 0,0    | 0,5    | 0,222                  | 0,287   | NA      | 0,112    | Inf                       | Inf      | NA       | Inf       |
| blaSHV         | 15,9                      | 80,4   | 7,5    | 51,2   | 0,197                  | 0,114   | 0,932   | 0,081    | 3,2                       | 10,8     | 0,5      | 5,0       |
| blaTEM         | 116,1                     | 530,0  | 21,3   | 326,5  | 0,274                  | 0,010   | 0,683   | 0,043    | 2,8                       | 24,8     | 0,2      | 4,6       |
| blaVEB         | 0,3                       | 0,0    | 0,6    | 0,2    | 1,000                  | 0,307   | 0,602   | 0,470    | 0,9                       | 0,0      | 2,1      | 0,0       |
| blaZ           | 1,5                       | 0,3    | 0,6    | 0,4    | 0,153                  | 0,761   | 0,507   | 0,153    | 0,3                       | 0,6      | 0,4      | 0,2       |
| blaZEG         | 0,0                       | 0,0    | 0,5    | 0,2    | 0,434                  | 0,307   | 0,216   | NA       | Inf                       | 0,0      | Inf      | NA        |
| car(A)         | 1,3                       | 0,9    | 1,1    | 1,0    | 0,916                  | 0,512   | 0,636   | 0,518    | 0,8                       | 0,9      | 0,8      | 0,7       |
| cat            | 568,4                     | 422,7  | 610,7  | 497,9  | 0,696                  | 0,610   | 0,570   | 0,950    | 0,9                       | 0,7      | 1,1      | 0,7       |
| catA           | 8,1                       | 55,3   | 9,4    | 36,9   | 0,213                  | 0,038   | 0,496   | 0,013    | 4,6                       | 5,9      | 1,2      | 6,9       |
| catB           | 307,3                     | 412,1  | 260,1  | 351,3  | 0,633                  | 0,171   | 0,683   | 0,282    | 1,1                       | 1,6      | 0,8      | 1,3       |
| catP           | 53,4                      | 100,8  | 67,6   | 87,5   | 0,146                  | 0,352   | 0,683   | 0,081    | 1,6                       | 1,5      | 1,3      | 1,9       |
| catQ           | 0,7                       | 1,7    | 0,5    | 1,2    | 0,561                  | 0,471   | 1,000   | 0,408    | 1,7                       | 3,4      | 0,7      | 2,3       |
| catS           | 141,9                     | 64,6   | 170,1  | 106,8  | 0,101                  | 1,000   | 0,683   | 0,043    | 0,8                       | 0,4      | 1,2      | 0,5       |
| cepA           | 162,3                     | 222,9  | 135,7  | 188,0  | 0,173                  | 0,067   | 0,570   | 0,142    | 1,2                       | 1,6      | 0,8      | 1,4       |
| cfiA           | 10,8                      | 45,3   | 25,3   | 37,3   | 0,023                  | 0,610   | 0,106   | 0,045    | 3,5                       | 1,8      | 2,4      | 4,2       |
| cfr            | 0,7                       | 0,9    | 0,0    | 0,5    | 0,855                  | 0,287   | 0,361   | 0,808    | 0,7                       | Inf      | 0,0      | 1,2       |
| cfxA           | 4613,5                    | 8315,6 | 5708,9 | 7272,9 | 0,027                  | 0,114   | 0,461   | 0,008    | 1,6                       | 1,5      | 1,2      | 1,8       |
| cml            | 11,1                      | 12,0   | 14,3   | 12,9   | 0,897                  | 0,610   | 0,570   | 0,852    | 1,2                       | 0,8      | 1,3      | 1,1       |
| cmlA           | 145,6                     | 274,4  | 270,3  | 272,8  | 0,009                  | 0,762   | 0,028   | 0,043    | 1,9                       | 1,0      | 1,9      | 1,9       |
| cmx            | 14,5                      | 19,4   | 24,9   | 21,6   | 0,515                  | 0,610   | 0,283   | 0,950    | 1,5                       | 0,8      | 1,7      | 1,3       |
| cphA           | 0,2                       | 0,0    | 0,0    | 0,0    | 0,314                  | NA      | 0,596   | 0,470    | 0,0                       | NA       | 0,0      | 0,0       |
| dfrA           | 41,4                      | 174,5  | 35,9   | 119,1  | 0,055                  | 0,019   | 1,000   | 0,003    | 2,9                       | 4,9      | 0,9      | 4,2       |
| dfrAb          | 1,0                       | 0,8    | 1,7    | 1,2    | 0,832                  | 1,000   | 1,000   | 0,821    | 1,2                       | 0,5      | 1,7      | 0,9       |
| dfrB           | 0,0                       | 0,6    | 0,7    | 0,6    | 0,116                  | 1,000   | 0,216   | 0,112    | Inf                       | 0,8      | Inf      | Inf       |
| dfrC           | 0,0                       | 0,7    | 0,0    | 0,4    | 0,222                  | 0,287   | NA      | 0,112    | Inf                       | Inf      | NA       | Inf       |
| dfrD           | 10,5                      | 4,0    | 6,7    | 5,1    | 1,000                  | 0,521   | 1,000   | 1,000    | 0,5                       | 0,6      | 0,6      | 0,4       |

|         |        |        |        |        |       |       |       |       |      |      |      |      |
|---------|--------|--------|--------|--------|-------|-------|-------|-------|------|------|------|------|
| dfrG    | 26,8   | 67,5   | 71,4   | 69,1   | 0,068 | 0,610 | 0,073 | 0,228 | 2,6  | 0,9  | 2,7  | 2,5  |
| dfrK    | 0,7    | 0,0    | 0,0    | 0,0    | 0,122 | NA    | 0,361 | 0,244 | 0,0  | NA   | 0,0  | 0,0  |
| ere(A)  | 11,9   | 33,5   | 35,3   | 34,2   | 0,004 | 0,914 | 0,004 | 0,059 | 2,9  | 0,9  | 3,0  | 2,8  |
| ere(B)  | 2,7    | 5,5    | 1,7    | 4,0    | 0,511 | 0,733 | 0,394 | 0,808 | 1,5  | 3,2  | 0,6  | 2,0  |
| erm(33) | 25,0   | 11,5   | 50,7   | 27,2   | 0,762 | 0,019 | 0,214 | 0,142 | 1,1  | 0,2  | 2,0  | 0,5  |
| erm(35) | 10,5   | 21,0   | 14,1   | 18,2   | 0,068 | 0,171 | 0,461 | 0,043 | 1,7  | 1,5  | 1,3  | 2,0  |
| erm(36) | 0,0    | 0,6    | 0,0    | 0,4    | 0,434 | 0,540 | NA    | 0,312 | Inf  | Inf  | NA   | Inf  |
| erm(39) | 0,3    | 0,0    | 0,0    | 0,0    | 0,314 | NA    | 0,596 | 0,470 | 0,0  | NA   | 0,0  | 0,0  |
| erm(42) | 8,5    | 27,2   | 6,6    | 19,0   | 0,168 | 0,019 | 0,799 | 0,024 | 2,2  | 4,1  | 0,8  | 3,2  |
| erm(A)  | 578,6  | 214,7  | 1030,2 | 540,9  | 0,573 | 0,010 | 0,154 | 0,043 | 0,9  | 0,2  | 1,8  | 0,4  |
| erm(B)  | 2692,5 | 3262,8 | 6120,8 | 4406,0 | 0,101 | 0,114 | 0,004 | 0,755 | 1,6  | 0,5  | 2,3  | 1,2  |
| erm(C)  | 102,1  | 47,2   | 423,2  | 197,6  | 1,000 | 0,010 | 0,073 | 0,181 | 1,9  | 0,1  | 4,1  | 0,5  |
| erm(F)  | 2913,5 | 4620,3 | 4571,4 | 4600,7 | 0,016 | 1,000 | 0,109 | 0,029 | 1,6  | 1,0  | 1,6  | 1,6  |
| erm(G)  | 620,5  | 742,2  | 1312,6 | 970,3  | 0,274 | 0,257 | 0,073 | 0,852 | 1,6  | 0,6  | 2,1  | 1,2  |
| erm(Q)  | 2,2    | 3,6    | 12,2   | 7,0    | 0,228 | 0,069 | 0,008 | 0,845 | 3,2  | 0,3  | 5,5  | 1,6  |
| erm(T)  | 2966,5 | 2760,4 | 4517,3 | 3463,1 | 0,203 | 0,114 | 0,214 | 0,414 | 1,2  | 0,6  | 1,5  | 0,9  |
| erm(X)  | 9,8    | 227,5  | 47,4   | 155,4  | 0,001 | 0,352 | 0,004 | 0,008 | 15,9 | 4,8  | 4,8  | 23,2 |
| erm(Y)  | 67,5   | 118,3  | 105,9  | 113,4  | 0,068 | 0,762 | 0,214 | 0,108 | 1,7  | 1,1  | 1,6  | 1,8  |
| flexA   | 0,5    | 4,5    | 0,6    | 2,9    | 0,108 | 0,124 | 0,911 | 0,033 | 6,0  | 8,0  | 1,2  | 9,2  |
| flaR    | 175,8  | 582,2  | 217,1  | 436,2  | 0,006 | 0,010 | 0,368 | 0,001 | 2,5  | 2,7  | 1,2  | 3,3  |
| fosA    | 17,4   | 35,0   | 9,4    | 24,7   | 0,237 | 0,038 | 0,933 | 0,108 | 1,4  | 3,7  | 0,5  | 2,0  |
| hugA    | 0,5    | 1,8    | 0,0    | 1,1    | 0,538 | 0,540 | 0,361 | 0,928 | 2,1  | Inf  | 0,0  | 3,5  |
| lmr(A)  | 0,0    | 0,0    | 0,6    | 0,2    | 0,434 | 0,307 | 0,216 | NA    | Inf  | 0,0  | Inf  | NA   |
| lnu(A)  | 1,2    | 1,0    | 4,7    | 2,5    | 0,289 | 0,570 | 0,363 | 0,408 | 2,1  | 0,2  | 4,0  | 0,8  |
| lnu(B)  | 6,1    | 28,2   | 8,6    | 20,3   | 0,016 | 0,019 | 0,570 | 0,001 | 3,3  | 3,3  | 1,4  | 4,6  |
| lnu(C)  | 237,4  | 283,4  | 349,0  | 309,6  | 0,122 | 0,610 | 0,214 | 0,228 | 1,3  | 0,8  | 1,5  | 1,2  |
| lnu(D)  | 1,2    | 3,1    | 4,7    | 3,8    | 0,019 | 0,352 | 0,028 | 0,081 | 3,0  | 0,7  | 3,8  | 2,5  |
| lnu(F)  | 0,4    | 4,9    | 0,0    | 3,0    | 0,427 | 0,072 | 0,361 | 0,100 | 6,7  | Inf  | 0,0  | 11,1 |
| lsa(A)  | 0,4    | 1,7    | 2,6    | 2,0    | 0,196 | 0,719 | 0,220 | 0,323 | 4,6  | 0,7  | 5,8  | 3,8  |
| lsa(B)  | 0,3    | 0,3    | 0,7    | 0,5    | 0,732 | 0,761 | 0,602 | 1,000 | 1,7  | 0,4  | 2,5  | 1,1  |
| lsa(C)  | 38,7   | 50,1   | 40,0   | 46,1   | 0,460 | 0,476 | 1,000 | 0,282 | 1,2  | 1,3  | 1,0  | 1,3  |
| mecA    | 0,5    | 0,0    | 2,0    | 0,8    | 0,538 | 0,307 | 0,911 | 0,244 | 1,6  | 0,0  | 3,9  | 0,0  |
| mef(A)  | 1164,2 | 1648,4 | 1517,7 | 1596,1 | 0,203 | 1,000 | 0,214 | 0,414 | 1,4  | 1,1  | 1,3  | 1,4  |
| mef(B)  | 1,8    | 25,0   | 0,5    | 15,2   | 0,429 | 0,048 | 0,394 | 0,075 | 8,5  | 49,4 | 0,3  | 14,0 |
| mph(A)  | 34,4   | 228,0  | 29,8   | 148,7  | 0,021 | 0,010 | 0,808 | 0,001 | 4,3  | 7,6  | 0,9  | 6,6  |
| mph(C)  | 0,7    | 0,0    | 0,6    | 0,2    | 0,272 | 0,307 | 1,000 | 0,127 | 0,3  | 0,0  | 0,8  | 0,0  |
| mph(E)  | 867,0  | 1132,8 | 892,6  | 1036,7 | 0,360 | 0,257 | 0,933 | 0,228 | 1,2  | 1,3  | 1,0  | 1,3  |
| msr(A)  | 0,4    | 0,4    | 0,7    | 0,5    | 1,000 | 0,761 | 0,911 | 0,928 | 1,1  | 0,5  | 1,6  | 0,8  |
| msr(C)  | 2,4    | 14,8   | 5,2    | 11,0   | 0,067 | 1,000 | 0,142 | 0,133 | 4,5  | 2,8  | 2,2  | 6,1  |
| msr(D)  | 1141,1 | 1612,8 | 1429,8 | 1539,6 | 0,146 | 0,914 | 0,073 | 0,491 | 1,3  | 1,1  | 1,3  | 1,4  |
| msr(E)  | 1605,5 | 2272,4 | 1658,8 | 2027,0 | 0,237 | 0,257 | 0,808 | 0,142 | 1,3  | 1,4  | 1,0  | 1,4  |
| nimA    | 6,2    | 6,8    | 3,6    | 5,5    | 1,000 | 1,000 | 1,000 | 1,000 | 0,9  | 1,9  | 0,6  | 1,1  |
| nimB    | 3,6    | 0,3    | 1,6    | 0,8    | 0,097 | 0,238 | 0,538 | 0,063 | 0,2  | 0,2  | 0,4  | 0,1  |
| nimC    | 0,7    | 2,1    | 0,0    | 1,3    | 0,538 | 0,540 | 0,361 | 0,928 | 1,8  | Inf  | 0,0  | 3,0  |
| nimD    | 23,6   | 106,5  | 55,1   | 85,9   | 0,505 | 0,521 | 0,808 | 0,228 | 3,6  | 1,9  | 2,3  | 4,5  |
| nimE    | 45,3   | 618,4  | 35,7   | 385,3  | 0,624 | 0,109 | 0,441 | 0,181 | 8,5  | 17,3 | 0,8  | 13,7 |
| nimF    | 1,1    | 1,0    | 13,7   | 6,1    | 0,337 | 0,139 | 0,107 | 0,936 | 5,5  | 0,1  | 12,5 | 0,9  |
| nimH    | 0,2    | 0,6    | 0,0    | 0,3    | 1,000 | 0,540 | 0,596 | 0,832 | 1,6  | Inf  | 0,0  | 2,6  |
| nimJ    | 0,8    | 47,9   | 0,0    | 28,7   | 0,329 | 0,149 | 0,596 | 0,106 | 36,5 | Inf  | 0,0  | 60,9 |
| norA    | 0,5    | 0,0    | 0,0    | 0,0    | 0,122 | NA    | 0,361 | 0,244 | 0,0  | NA   | 0,0  | 0,0  |
| npmA    | 0,0    | 2,9    | 7,4    | 4,7    | 0,005 | 0,331 | 0,010 | 0,012 | Inf  | 0,4  | Inf  | Inf  |
| ole(B)  | 1,2    | 1,5    | 0,7    | 1,2    | 0,960 | 0,631 | 0,686 | 0,886 | 1,0  | 2,0  | 0,6  | 1,2  |
| ole(C)  | 0,3    | 0,3    | 0,7    | 0,5    | 0,732 | 0,761 | 0,602 | 1,000 | 1,7  | 0,4  | 2,6  | 1,1  |
| oqxA    | 58,0   | 70,6   | 10,7   | 46,6   | 0,897 | 0,010 | 0,461 | 0,414 | 0,8  | 6,6  | 0,2  | 1,2  |
| oqxB    | 122,1  | 192,0  | 47,8   | 134,3  | 0,460 | 0,010 | 0,933 | 0,228 | 1,1  | 4,0  | 0,4  | 1,6  |
| otr(A)  | 1,0    | 0,9    | 0,0    | 0,6    | 0,597 | 0,149 | 0,220 | 1,000 | 0,5  | Inf  | 0,0  | 0,9  |
| otr(C)  | 0,0    | 0,3    | 0,0    | 0,2    | 0,434 | 0,540 | NA    | 0,312 | Inf  | Inf  | NA   | Inf  |
| penA    | 0,2    | 0,3    | 0,0    | 0,2    | 0,871 | 0,540 | 0,596 | 1,000 | 0,7  | Inf  | 0,0  | 1,2  |
| qepA    | 0,3    | 5,2    | 0,5    | 3,3    | 0,464 | 0,896 | 0,794 | 0,419 | 12,6 | 10,2 | 1,9  | 19,7 |
| QnrA    | 0,2    | 0,0    | 0,0    | 0,0    | 0,314 | NA    | 0,596 | 0,470 | 0,0  | NA   | 0,0  | 0,0  |
| QnrB    | 2,1    | 19,8   | 1,2    | 12,4   | 0,156 | 0,067 | 1,000 | 0,041 | 5,9  | 16,0 | 0,6  | 9,4  |
| QnrD    | 42,0   | 120,7  | 8,4    | 75,8   | 0,034 | 1,000 | 0,073 | 0,108 | 1,8  | 14,4 | 0,2  | 2,9  |
| QnrS    | 6,6    | 73,8   | 2,2    | 45,2   | 0,156 | 0,013 | 0,507 | 0,011 | 6,9  | 32,9 | 0,3  | 11,2 |
| rmtD    | 0,8    | 0,0    | 0,0    | 0,0    | 0,047 | NA    | 0,220 | 0,127 | 0,0  | NA   | 0,0  | 0,0  |
| spc     | 1,0    | 2,2    | 28,4   | 12,7   | 0,329 | 0,139 | 0,103 | 0,940 | 12,4 | 0,1  | 27,7 | 2,2  |
| sph     | 1,0    | 3,9    | 0,0    | 2,3    | 0,538 | 0,540 | 0,361 | 0,928 | 2,3  | Inf  | 0,0  | 3,8  |
| srn(B)  | 1,8    | 3,2    | 1,1    | 2,4    | 0,669 | 0,741 | 0,925 | 0,448 | 1,3  | 3,0  | 0,6  | 1,8  |
| str     | 81,3   | 194,7  | 76,1   | 147,2  | 0,203 | 0,171 | 1,000 | 0,059 | 1,8  | 2,6  | 0,9  | 2,4  |
| strA    | 224,5  | 402,7  | 212,9  | 326,7  | 0,068 | 0,114 | 0,368 | 0,059 | 1,5  | 1,9  | 0,9  | 1,8  |
| strB    | 174,3  | 441,6  | 258,0  | 368,1  | 0,009 | 0,257 | 0,154 | 0,008 | 2,1  | 1,7  | 1,5  | 2,5  |
| sul1    | 822,6  | 1410,2 | 666,6  | 1112,8 | 0,696 | 0,067 | 0,368 | 0,181 | 1,4  | 2,1  | 0,8  | 1,7  |
| sul2    | 548,7  | 1413,3 | 523,8  | 1057,5 | 0,122 | 0,019 | 0,683 | 0,005 | 1,9  | 2,7  | 1,0  | 2,6  |
| sul3    | 71,4   | 148,5  | 61,5   | 113,7  | 0,146 | 0,019 | 0,808 | 0,013 | 1,6  | 2,4  | 0,9  | 2,1  |
| tet(31) | 24,8   | 11,6   | 34,2   | 20,6   | 0,696 | 0,038 | 0,109 | 0,059 | 0,8  | 0,3  | 1,4  | 0,5  |
| tet(32) | 2125,0 | 2966,2 | 3041,1 | 2996,2 | 0,001 | 0,762 | 0,008 | 0,013 | 1,4  | 1,0  | 1,4  | 1,4  |
| tet(33) | 40,8   | 94,3   | 36,1   | 71,1   | 0,573 | 0,762 | 0,683 | 0,662 | 1,7  | 2,6  | 0,9  | 2,3  |
| tet(35) | 0,0    | 0,0    | 0,5    | 0,2    | 0,434 | 0,307 | 0,216 | NA    | Inf  | 0,0  | Inf  | NA   |
| tet(36) | 52,8   | 116,0  | 35,2   | 83,7   | 0,315 | 0,038 | 0,283 | 0,013 | 1,6  | 3,3  | 0,7  | 2,2  |
| tet(37) | 0,5    | 3,4    | 0,0    | 2,1    | 0,315 | 0,072 | 0,361 | 0,054 | 4,3  | Inf  | 0,0  | 7,1  |
| tet(38) | 1,4    | 0,6    | 0,7    | 0,6    | 0,143 | 1,000 | 0,468 | 0,148 | 0,5  | 0,8  | 0,5  | 0,4  |
| tet(39) | 0,5    | 2,0    | 0,0    | 1,2    | 0,955 | 0,149 | 0,361 | 0,498 | 2,3  | Inf  | 0,0  | 3,8  |
| tet(40) | 2154,1 | 3869,8 | 2284,6 | 3235,7 | 0,083 | 0,476 | 0,368 | 0,081 | 1,5  | 1,7  | 1,1  | 1,8  |
| tet(41) | 1,2    | 0,0    | 0,0    | 0,0    | 0,314 | NA    | 0,596 | 0,470 | 0,0  | NA   | 0,0  | 0,0  |
| tet(44) | 250,2  | 182,6  | 170,2  | 177,6  | 0,055 | 0,257 | 0,283 | 0,059 | 0,7  | 1,1  | 0,7  | 0,7  |
| tet(A)  | 82,4   | 292,0  | 78,0   | 206,4  | 0,043 | 0,010 | 1,000 | 0,001 | 2,5  | 3,7  | 0,9  | 3,5  |
| tet(B)  | 24,1   | 136,1  | 15,0   | 87,7   | 0,274 | 0,019 | 0,368 | 0,013 | 3,6  | 9,1  | 0,6  | 5,7  |

|         |         |         |         |         |       |       |       |       |     |     |     |      |
|---------|---------|---------|---------|---------|-------|-------|-------|-------|-----|-----|-----|------|
| tet(C)  | 100,7   | 107,2   | 172,7   | 133,4   | 0,173 | 0,114 | 0,109 | 0,491 | 1,3 | 0,6 | 1,7 | 1,1  |
| tet(D)  | 3,9     | 42,4    | 5,2     | 27,5    | 0,094 | 0,235 | 0,636 | 0,044 | 7,1 | 8,2 | 1,3 | 11,0 |
| tet(E)  | 0,5     | 1,0     | 0,0     | 0,6     | 0,732 | 0,287 | 0,596 | 0,419 | 1,2 | Inf | 0,0 | 1,9  |
| tet(G)  | 440,6   | 1007,1  | 460,1   | 788,3   | 0,122 | 0,171 | 0,683 | 0,059 | 1,8 | 2,2 | 1,0 | 2,3  |
| tet(H)  | 99,1    | 12,4    | 60,1    | 31,5    | 0,893 | 0,106 | 0,349 | 0,644 | 0,3 | 0,2 | 0,6 | 0,1  |
| tet(I)  | 2,8     | 1,8     | 0,0     | 1,1     | 0,452 | 0,540 | 0,361 | 0,788 | 0,4 | Inf | 0,0 | 0,6  |
| tet(K)  | 1,6     | 0,4     | 0,5     | 0,5     | 0,153 | 1,000 | 0,298 | 0,259 | 0,3 | 0,8 | 0,3 | 0,3  |
| tet(L)  | 105,8   | 217,4   | 107,4   | 173,4   | 0,274 | 0,171 | 1,000 | 0,108 | 1,6 | 2,0 | 1,0 | 2,1  |
| tet(M)  | 6144,4  | 11530,0 | 10299,7 | 11037,9 | 0,122 | 1,000 | 0,214 | 0,228 | 1,8 | 1,1 | 1,7 | 1,9  |
| tet(O)  | 12664,2 | 13688,1 | 13406,5 | 13575,5 | 0,515 | 0,914 | 0,808 | 0,491 | 1,1 | 1,0 | 1,1 | 1,1  |
| tet(Q)  | 22292,8 | 31013,4 | 29197,6 | 30287,1 | 0,004 | 1,000 | 0,109 | 0,005 | 1,4 | 1,1 | 1,3 | 1,4  |
| tet(S)  | 35,7    | 43,9    | 53,5    | 47,8    | 1,000 | 0,352 | 0,683 | 0,755 | 1,3 | 0,8 | 1,5 | 1,2  |
| tet(T)  | 1778,1  | 1084,7  | 3386,3  | 2005,3  | 0,633 | 0,038 | 0,109 | 0,662 | 1,1 | 0,3 | 1,9 | 0,6  |
| tet(U)  | 0,0     | 0,0     | 4,1     | 1,7     | 0,222 | 0,094 | 0,050 | NA    | Inf | 0,0 | Inf | NA   |
| tet(W)  | 12109,7 | 12059,9 | 10607,4 | 11478,9 | 0,360 | 1,000 | 0,368 | 0,573 | 0,9 | 1,1 | 0,9 | 1,0  |
| tet(X)  | 2153,2  | 1669,8  | 2150,3  | 1862,0  | 0,633 | 0,610 | 0,933 | 0,414 | 0,9 | 0,8 | 1,0 | 0,8  |
| tet(Y)  | 85,1    | 74,1    | 69,5    | 72,3    | 0,965 | 1,000 | 1,000 | 0,950 | 0,8 | 1,1 | 0,8 | 0,9  |
| tet(Z)  | 2,4     | 10,6    | 14,5    | 12,2    | 0,166 | 0,336 | 0,050 | 0,648 | 5,1 | 0,7 | 6,1 | 4,4  |
| tetA(P) | 8,9     | 22,1    | 6,0     | 15,7    | 0,248 | 0,171 | 0,683 | 0,196 | 1,8 | 3,7 | 0,7 | 2,5  |
| tetB(P) | 16,9    | 49,6    | 11,8    | 34,5    | 0,274 | 0,352 | 0,683 | 0,228 | 2,0 | 4,2 | 0,7 | 2,9  |
| tlr(C)  | 1,0     | 1,0     | 1,6     | 1,2     | 0,626 | 0,570 | 0,636 | 0,775 | 1,2 | 0,6 | 1,5 | 0,9  |
| VanA    | 0,3     | 0,0     | 0,0     | 0,0     | 0,314 | NA    | 0,596 | 0,470 | 0,0 | NA  | 0,0 | 0,0  |
| VanAo2  | 0,5     | 0,0     | 0,0     | 0,0     | 0,122 | NA    | 0,361 | 0,244 | 0,0 | NA  | 0,0 | 0,0  |
| VanB    | 6,9     | 11,6    | 3,4     | 8,3     | 0,762 | 0,038 | 0,283 | 0,181 | 1,2 | 3,4 | 0,5 | 1,7  |
| VanC    | 5,0     | 9,6     | 2,2     | 6,7     | 0,623 | 0,165 | 0,261 | 0,948 | 1,3 | 4,3 | 0,5 | 1,9  |
| VanD    | 26,4    | 49,3    | 80,1    | 61,6    | 0,006 | 0,762 | 0,048 | 0,020 | 2,3 | 0,6 | 3,0 | 1,9  |
| VanE    | 0,2     | 0,0     | 0,0     | 0,0     | 0,314 | NA    | 0,596 | 0,470 | 0,0 | NA  | 0,0 | 0,0  |
| VanF    | 0,5     | 0,0     | 0,0     | 0,0     | 0,122 | NA    | 0,361 | 0,244 | 0,0 | NA  | 0,0 | 0,0  |
| VanG    | 161,0   | 79,3    | 102,3   | 88,5    | 0,083 | 0,476 | 0,461 | 0,059 | 0,6 | 0,8 | 0,6 | 0,5  |
| VanM    | 0,2     | 0,0     | 0,5     | 0,2     | 1,000 | 0,307 | 0,602 | 0,470 | 0,8 | 0,0 | 2,1 | 0,0  |
| VanN    | 0,2     | 0,0     | 0,0     | 0,0     | 0,314 | NA    | 0,596 | 0,470 | 0,0 | NA  | 0,0 | 0,0  |
| VanPt   | 1,6     | 0,6     | 0,0     | 0,3     | 0,038 | 0,287 | 0,072 | 0,148 | 0,2 | Inf | 0,0 | 0,4  |
| vat(B)  | 0,0     | 0,6     | 0,0     | 0,4     | 0,222 | 0,287 | NA    | 0,112 | Inf | Inf | NA  | Inf  |
| vat(E)  | 0,0     | 2,0     | 0,7     | 1,5     | 0,116 | 0,694 | 0,216 | 0,112 | Inf | 2,7 | Inf | Inf  |
| vga(A)  | 0,3     | 0,0     | 0,0     | 0,0     | 0,314 | NA    | 0,596 | 0,470 | 0,0 | NA  | 0,0 | 0,0  |
| vga(B)  | 0,3     | 0,3     | 0,7     | 0,5     | 0,732 | 0,761 | 0,602 | 1,000 | 1,7 | 0,4 | 2,5 | 1,1  |
| vga(C)  | 0,3     | 0,0     | 0,0     | 0,0     | 0,314 | NA    | 0,596 | 0,470 | 0,0 | NA  | 0,0 | 0,0  |
| vga(E)  | 1,7     | 4,2     | 10,0    | 6,6     | 0,108 | 0,476 | 0,146 | 0,240 | 3,9 | 0,4 | 5,9 | 2,5  |

Supplementary Table 7: Overview of norovirus (NoV) genome copies present in 5 ml tested airplane toilet samples<sup>a</sup>

|                                       |               |                    | Flight No         | Sampling date |          |          |          |
|---------------------------------------|---------------|--------------------|-------------------|---------------|----------|----------|----------|
|                                       |               |                    |                   |               | GI       | GII      | GI+GII   |
| F015-5                                | South Asia    | Thailand           | TG 950            | 23-08-2013    | 4,76E+03 | 5,99E+04 | 6,46E+04 |
| F016-16                               | South Asia    | Thailand/Bangkok   | TG 950            | 27-06-2013    | 1,86E+03 | 7,49E+03 | 9,34E+03 |
| F016-12                               | South Asia    | Thailand           | TG 950            | 29-08-2013    | 4,38E+06 | 1,23E+03 | 4,39E+06 |
| F016-11                               | South Asia    | Singapore          | Singapore Airline | 29-08-2013    | <tLOD    | 1,42E+03 | 1,42E+03 |
| F015-4                                | South Asia    | Singapore          | SQ 352            | 23-08-2013    | 1,17E+02 | 6,95E+01 | 1,86E+02 |
| F015-8                                | South Asia    | Pakistan/Islamabad | PK 771            | 24-08-2013    | 1,36E+02 | 2,61E+06 | 2,61E+06 |
| F016-09                               | North Asia    | China/Beijing      | SK996             | 28-08-2013    | 3,26E+04 | 6,74E+01 | 3,27E+04 |
| F015-3                                | North Asia    | Japan              | SK084             | 22-08-2013    | 3,76E+01 | 5,53E+01 | 9,29E+01 |
| F016-10                               | North Asia    | Japan/Tokyo        | SK984             | 28-08-2013    | 2,21E+04 | 1,85E+01 | 2,22E+04 |
| F017-1                                | North Asia    | China              | SK996             | 22-08-2013    | <tLOD    | 8,08E+00 | 8,08E+00 |
| F016-15                               | North America | Canada/toronto     | AC 882            | 27-06-2013    | <tLOD    | 9,80E+02 | 9,80E+02 |
| F015-6                                | North America | USA Washington     | SK 926            | 23-08-2013    | <tLOD    | 1,21E+02 | 1,21E+02 |
| F017-14                               | North America | USA Washington     | SK 926            | 29-08-2013    | 1,53E+05 | 1,85E+02 | 1,53E+05 |
| F017-13                               | North America | USA Newark NY      | SK 910            | 29-08-2013    | 2,46E+04 | 4,96E+01 | 2,46E+04 |
| F017-17                               | North America | USA Washington     | SK 926            | 27-06-2013    | <tLOD    | <tLOD    | <tLOD    |
| F017-18                               | North America | USA Newark NY      | SK 910            | 27-06-2013    | <tLOD    | <tLOD    | <tLOD    |
| F017-7                                | North America | USA Newark NY      | SK 910            | 23-08-2013    | <tLOD    | <tLOD    | <tLOD    |
| F015-2                                | North America | Greenland          | GL 782            | 22-08-2013    | <tLOD    | <tLOD    | <tLOD    |
| No of positive detections             |               |                    |                   |               | 10       | 14       | 14       |
| Minimum concentration detected        |               |                    |                   |               | 3,76E+01 | 8,08E+00 | 8,08E+00 |
| Maximum concentration detected        |               |                    |                   |               | 4,38E+06 | 2,61E+06 | 4,39E+06 |
| Geometric Mean of positive detections |               |                    |                   |               | 6,02E+03 | 5,13E+02 | 6,79E+03 |
| P-values for                          |               |                    |                   |               | 0,125    | 0,044    | 0,067    |
| comparison between                    |               |                    |                   |               | 1        | 0,0095   | 0,257    |
| NoV levels of different               |               |                    |                   |               | 0,29     | 0,795    | 0,436    |
| origins <sup>d</sup>                  |               |                    |                   |               | 0,148    | 0,007    | 0,043    |

<sup>a</sup> Estimated amounts of detected NoV genogroup (GI) and GII genome copies (CG) by real-time RT-PCR in 5 ml tested airplane toilet samples (expressed in numbers and log scale).<sup>b</sup> <tLOD, not detected or below theoretical limit of detection calculated to 8 GC/ml or Log(0.90) GC/ml airplane toilet sample.<sup>c</sup> tLOD, Log(0.90) GC/ml airplane toilet sample, was used for comparison of P-values for inclusion of negative detections in the T-Test for log-transformed values<sup>d</sup> Statistical analysis using Wilcoxon Rank Sum Test

## Performance of method applied to detect norovirus in airplane toilet samples

| Extraction efficiency <sup>a</sup> (% of MC <sub>0</sub> Rec ± SD) |                       | Amplification efficiency <sup>b</sup> (% ± SD) |                       |               |                       |
|--------------------------------------------------------------------|-----------------------|------------------------------------------------|-----------------------|---------------|-----------------------|
|                                                                    |                       | norovirus GI                                   |                       | norovirus GII |                       |
| Undiluted RNA                                                      | 1/10 <sup>c</sup> RNA | Undiluted RNA                                  | 1/10 <sup>c</sup> RNA | Undiluted RNA | 1/10 <sup>c</sup> RNA |
| 19.9 ± 23.8                                                        | 25.6 ± 23.9           | 81.4 ± 19.4                                    | 75.6 ± 23.0           | 86.5 ± 10.9   | 94.7 ± 7.7            |

<sup>a</sup> Average extraction efficiency of internal process control, mengovirus (MC<sub>0</sub>), recovered during nucleic acid extraction after inoculation in 5 ml air-toilet samples; ((Mean RT-PCR Units recovered)/(Mean RT-PCR U inoculated) × 100).<sup>b</sup> Average amplification efficiency during detection of norovirus GI or GII genomes recovered after inoculation in duplicates of 2.5µl RNA extracts; ((Mean genome copies recovered)/(Mean genome copies inoculated) × 100).<sup>c</sup> 1:10 indicates dilution of the extracted RNA prior to analysis.

Supplementary table S7: Identification of specific pathogens in airline waste

|                                           | Flight   |          |          |          |             |             |           |            |            |            |           |          |           |              |              |              |          |           |
|-------------------------------------------|----------|----------|----------|----------|-------------|-------------|-----------|------------|------------|------------|-----------|----------|-----------|--------------|--------------|--------------|----------|-----------|
|                                           | China-2  | China-3  | Japan-2  | Japan-3  | Singapore-2 | Singapore-3 | Pakistan  | Thailand-1 | Thailand-2 | Thailand-3 | Newark-1  | Newark-2 | Newark-3  | Washington-1 | Washington-2 | Washington-3 | Toronto  | Greenland |
| Number of reads mappng to MetaHitAssembly | 80323500 | 72390182 | 55633018 | 81960564 | 64756198    | 102443028   | 86911454  | 78957422   | 94506024   | 88750766   | 85279992  | 77076030 | 86873034  | 100336712    | 72222900     | 91944290     | 78108170 | 72416918  |
| Number of reads mapping to Bacteria       | 15515220 | 14036912 | 11155040 | 12826418 | 12046278    | 19063912    | 19262526  | 12074186   | 17290900   | 15612290   | 15430798  | 15484890 | 16684544  | 17923640     | 12864702     | 17688794     | 14223790 | 14296084  |
| Sum                                       | 95838720 | 86427130 | 66788058 | 94786982 | 76802476    | 121506940   | 106173980 | 91031608   | 111796924  | 104363056  | 100710790 | 92560920 | 103557578 | 118260352    | 85087602     | 109633084    | 92331960 | 86713002  |

### Pathogen unique read counts (unique reads mapping to genomes below)

|                                                                                          | China-2 | China-3 | Japan-2 | Japan-3 | Singapore-2 | Singapore-3 | Pakistan | Thailand-1 | Thailand-2 | Thailand-3 | Newark-1 | Newark-2 | Newark-3 | Washington-1 | Washington-2 | Washington-3 | Toronto | Greenland |
|------------------------------------------------------------------------------------------|---------|---------|---------|---------|-------------|-------------|----------|------------|------------|------------|----------|----------|----------|--------------|--------------|--------------|---------|-----------|
| <i>Salmonella enterica</i> subsp. <i>enterica</i> serovar Typhimurium DT104, HF9373208.1 | 952     | 596     | 388     | 988     | 836         | 1478        | 2504     | 716        | 1764       | 900        | 786      | 914      | 1198     | 706          | 550          | 840          | 654     | 252       |
| <i>Clostridium difficile</i> R20291 complete genome, FN545816.1                          | 32702   | 29126   | 22550   | 21526   | 22358       | 33444       | 23996    | 18328      | 30648      | 30794      | 28810    | 32690    | 40350    | 38278        | 24006        | 34540        | 26468   | 28488     |
| <i>Campylobacter jejuni</i> subsp. <i>jejuni</i> IA3902, complete genome, CP001876.1     | 2266    | 2630    | 1186    | 2646    | 1560        | 3054        | 5024     | 1776       | 2072       | 3430       | 1844     | 1442     | 3010     | 4162         | 2888         | 3238         | 2558    | 1064      |

Normalised read count\*1 mill / (MetaHit+Bacteria)

## Pathogen normalized counts

|                                                                                         | China-2    | China-3    | Japan-2   | Japan-3   | Singapore-2 | Singapore-3 | Pakistan   | Thailand-1 | Thailand-2 | Thailand-3 | Newark-1   | Newark-2   | Newark-3   | Washington-1 | Washington-2 | Washington-3 | Toronto   | Greenland |
|-----------------------------------------------------------------------------------------|------------|------------|-----------|-----------|-------------|-------------|------------|------------|------------|------------|------------|------------|------------|--------------|--------------|--------------|-----------|-----------|
| <i>Salmonella enterica</i> subsp. <i>enterica</i> serovar Typhimurium DT104, HP937208.1 | 9,9333547  | 6,89598278 | 5,8094212 | 10,423372 | 10,8850657  | 12,1639143  | 23,5839327 | 7,86539989 | 15,7786094 | 8,62374314 | 7,80452621 | 9,87457774 | 11,5684436 | 5,969879068  | 6,463926437  | 7,661920739  | 7,0831378 | 2,9061386 |
| <i>Clostridium difficile</i> R20291 complete genome, FN545816.1                         | 34,2129081 | 337,000662 | 337,63521 | 227,0987  | 291,110406  | 275,243538  | 226,60049  | 201,336661 | 174,139922 | 295,066101 | 286,066667 | 353,172828 | 389,633836 | 323,6756813  | 282,1327601  | 315,5080739  | 286,6613  | 328,53205 |
| <i>Campylobacter jejuni</i> subsp. <i>jejuni</i> IA3902, complete genome, CPK001876.1   | 23,6438884 | 30,4302596 | 17,757666 | 27,915226 | 20,118452   | 25,1343668  | 47,3185615 | 19,509707  | 28,5336047 | 32,8660364 | 18,3098554 | 15,728909  | 29,0659559 | 35,19353683  | 33,94149009  | 23,54588018  | 27,704383 | 12,270363 |

### Statistical analysis using T-test based on the Normalised read counts

| A_NA       | SA_NA      | SA_CJ     | NA_CJ     |
|------------|------------|-----------|-----------|
| 0,03225247 | 0,03124541 | 0,0534578 | 0,2890167 |
| 0,03510631 | 0,00669997 | 0,0889201 | 0,3817684 |
| 0,39404908 | 0,35668237 | 0,3363526 | 0,475277  |

A: Asia; NA: North America; SA: South Asia; CJ: China and Japan.

Supplementary Table 7: Overview of norovirus (NoV) genome copies present in 5 ml tested airplane toilet samples<sup>a</sup>

|                                       |               |                    | Flight No         | Sampling date |          |          |          |
|---------------------------------------|---------------|--------------------|-------------------|---------------|----------|----------|----------|
|                                       |               |                    |                   |               | GI       | GII      | GI+GII   |
| F015-5                                | South Asia    | Thailand           | TG 950            | 23-08-2013    | 4,76E+03 | 5,99E+04 | 6,46E+04 |
| F016-16                               | South Asia    | Thailand/Bangkok   | TG 950            | 27-06-2013    | 1,86E+03 | 7,49E+03 | 9,34E+03 |
| F016-12                               | South Asia    | Thailand           | TG 950            | 29-08-2013    | 4,38E+06 | 1,23E+03 | 4,39E+06 |
| F016-11                               | South Asia    | Singapore          | Singapore Airline | 29-08-2013    | <tLOD    | 1,42E+03 | 1,42E+03 |
| F015-4                                | South Asia    | Singapore          | SQ 352            | 23-08-2013    | 1,17E+02 | 6,95E+01 | 1,86E+02 |
| F015-8                                | South Asia    | Pakistan/Islamabad | PK 771            | 24-08-2013    | 1,36E+02 | 2,61E+06 | 2,61E+06 |
| F016-09                               | North Asia    | China/Beijing      | SK996             | 28-08-2013    | 3,26E+04 | 6,74E+01 | 3,27E+04 |
| F015-3                                | North Asia    | Japan              | SK084             | 22-08-2013    | 3,76E+01 | 5,53E+01 | 9,29E+01 |
| F016-10                               | North Asia    | Japan/Tokyo        | SK984             | 28-08-2013    | 2,21E+04 | 1,85E+01 | 2,22E+04 |
| F017-1                                | North Asia    | China              | SK996             | 22-08-2013    | <tLOD    | 8,08E+00 | 8,08E+00 |
| F016-15                               | North America | Canada/toronto     | AC 882            | 27-06-2013    | <tLOD    | 9,80E+02 | 9,80E+02 |
| F015-6                                | North America | USA Washington     | SK 926            | 23-08-2013    | <tLOD    | 1,21E+02 | 1,21E+02 |
| F017-14                               | North America | USA Washington     | SK 926            | 29-08-2013    | 1,53E+05 | 1,85E+02 | 1,53E+05 |
| F017-13                               | North America | USA Newark NY      | SK 910            | 29-08-2013    | 2,46E+04 | 4,96E+01 | 2,46E+04 |
| F017-17                               | North America | USA Washington     | SK 926            | 27-06-2013    | <tLOD    | <tLOD    | <tLOD    |
| F017-18                               | North America | USA Newark NY      | SK 910            | 27-06-2013    | <tLOD    | <tLOD    | <tLOD    |
| F017-7                                | North America | USA Newark NY      | SK 910            | 23-08-2013    | <tLOD    | <tLOD    | <tLOD    |
| F015-2                                | North America | Greenland          | GL 782            | 22-08-2013    | <tLOD    | <tLOD    | <tLOD    |
| No of positive detections             |               |                    |                   |               | 10       | 14       | 14       |
| Minimum concentration detected        |               |                    |                   |               | 3,76E+01 | 8,08E+00 | 8,08E+00 |
| Maximum concentration detected        |               |                    |                   |               | 4,38E+06 | 2,61E+06 | 4,39E+06 |
| Geometric Mean of positive detections |               |                    |                   |               | 6,02E+03 | 5,13E+02 | 6,79E+03 |
| P-values for                          |               |                    |                   |               | 0,125    | 0,044    | 0,067    |
| comparison between                    |               |                    |                   |               | 1        | 0,0095   | 0,257    |
| NoV levels of different               |               |                    |                   |               | 0,29     | 0,795    | 0,436    |
| origins <sup>d</sup>                  |               |                    |                   |               | 0,148    | 0,007    | 0,043    |

<sup>a</sup> Estimated amounts of detected NoV genogroup (GI) and GII genome copies (GC) by real-time RT-PCR in 5 ml tested airplane toilet samples (expressed in numbers and log scale).<sup>b</sup> <tLOD, not detected or below theoretical limit of detection calculated to 8 GC/ml or Log(0.90) GC/ml airplane toilet sample.<sup>c</sup> tLOD, Log(0.90) GC/ml airplane toilet sample, was used for comparison of P-values for inclusion of negative detections in the T-Test for log-transformed values<sup>d</sup> Statistical analysis using Wilcoxon Rank Sum Test

## Performance of method applied to detect norovirus in airplane toilet samples

| Extraction efficiency <sup>a</sup> (% of MC <sub>0</sub> Rec ± SD) |                       | Amplification efficiency <sup>b</sup> (% ± SD) |                       |               |                       |
|--------------------------------------------------------------------|-----------------------|------------------------------------------------|-----------------------|---------------|-----------------------|
|                                                                    |                       | norovirus GI                                   |                       | norovirus GII |                       |
| Undiluted RNA                                                      | 1/10 <sup>c</sup> RNA | Undiluted RNA                                  | 1/10 <sup>c</sup> RNA | Undiluted RNA | 1/10 <sup>c</sup> RNA |
| 19.9 ± 23.8                                                        | 25.6 ± 23.9           | 81.4 ± 19.4                                    | 75.6 ± 23.0           | 86.5 ± 10.9   | 94.7 ± 7.7            |

<sup>a</sup> Average extraction efficiency of internal process control, mengovirus (MC<sub>0</sub>), recovered during nucleic acid extraction after inoculation in 5 ml air-toilet samples; ((Mean RT-PCR Units recovered)/(Mean RT-PCR U inoculated) × 100).<sup>b</sup> Average amplification efficiency during detection of norovirus GI or GII genomes recovered after inoculation in duplicates of 2.5µl RNA extracts; ((Mean genome copies recovered)/(Mean genome copies inoculated) × 100).<sup>c</sup> 1:10 indicates dilution of the extracted RNA prior to analysis.

Supplementary table S8. Conversion table of ResFinder ide

| <b>Resfinder id</b>     | <b>Gene name</b> |
|-------------------------|------------------|
| aadA12_1_AY665771       | aadA             |
| aadA22_1_AM261837       | aadA             |
| aadA11_1_AY144590       | aadA             |
| aac(3)-Id_1_AB114632    | aac(3)-I         |
| aac(3)-IIIa_1_X55652    | aac(3)-III       |
| aadA21_1_AY171244       | aadA             |
| aadA2_1_X68227          | aadA             |
| aac(3)-If_1_AY884051    | aac(3)-I         |
| aadA23_1_AJ809407       | aadA             |
| aac(2')-Ic_1_U72714     | aac(2')-I        |
| aadA5_1_AF137361        | aadA             |
| aac(2')-Id_1_U72743     | aac(2')-I        |
| aac(2')-Ie_1_NC_011896  | aac(2')-I        |
| aadA1_5_JX185132        | aadA             |
| aac(3)-Ic_1_AJ511268    | aac(3)-I         |
| aph(2'')-Ib_1_AF337947  | aph(2'')-I       |
| aph(2'')-Ic_1_U51479    | aph(2'')-I       |
| aac(3)-Ib_1_L06157      | aac(3)-I         |
| aadA14_1_AJ884726       | aadA             |
| aadA15_1_DQ393783       | aadA             |
| aph(3')-IIc_1_AM743169  | aph(3')-II       |
| aadA13_1_AY713504       | aadA             |
| aac(2')-Ib_1_U41471     | aac(2')-I        |
| aac(2')-Ia_1_L06156     | aac(2')-I        |
| aph(3')-Ic_1_X62115     | aph(3')-I        |
| aph(3')-IV_1_X03364     | aph(3')-IV       |
| aph(3')-Ia_1_V00359     | aph(3')-I        |
| aph(3')-Ib_1_M20305     | aph(3')-I        |
| aadA24_1_AM711129       | aadA             |
| aph(3')-Id_1_Z48231     | aph(3')-I        |
| aph(3')-VIII_1_AF182845 | aph(3')-VIII     |
| aph(3')-VIIa_1_M29953   | aph(3')-VII      |
| aph(3')-Vc_1_S81599     | aph(3')-V        |
| aph(3')-XV_1_Y18050     | aph(3')-XV       |
| aph(4)-Ia_1_V01499      | aph(4)-I         |
| aadA4_1_Z50802          | aadA             |
| aph(6)-Ia_1_AY971801    | aph(6)-I         |
| aph(6)-Ib_1_X05648      | aph(6)-I         |
| aph(6)-Ic_1_X01702      | aph(6)-I         |
| aph(4)-Ib_1_X03615      | aph(4)-I         |
| aac(3)-Ig_1_CP000282    | aac(3)-I         |
| aac(3)-Ih_1_CP000490    | aac(3)-I         |

|                         |             |
|-------------------------|-------------|
| aph(3')-VIb_1_AJ627643  | aph(3')-VI  |
| aph(9)-Ia_1_U94857      | aph(9)-I    |
| aadA3_1_AF047479        | aadA        |
| aac(3)-VIIa_1_M22999    | aac(3)-VII  |
| aac(3)-VIa_1_M88012     | aac(3)-VI   |
| aac(3)-Xa_1_AB028210    | aac(3)-X    |
| aac(6')-31_1_AJ640197   | aac(6')-31  |
| aac(6')-32_1_EF614235   | aac(6')-32  |
| aac(6')-33_1_GQ337064   | aac(6')-33  |
| aac(6')-I30_1_AY289608  | aac(6')-I30 |
| aac(6')-IIa_1_M29695    | aac(6')-II  |
| aac(6')-IIb_1_L06163    | aac(6')-II  |
| aac(6')-IIc_1_AF162771  | aac(6')-II  |
| aac(6')-Ia_1_M18967     | aac(6')-I   |
| aadA2_2_JQ364967        | aadA        |
| aac(6')-Iad_1_AB119105  | aac(6')-I   |
| aac(6')-Iae_1_AB104852  | aac(6')-I   |
| aac(6')-Iaf_1_AB462903  | aac(6')-I   |
| aac(6')-Iai_1_EU886977  | aac(6')-I   |
| aac(6')-Ib_1_M21682     | aac(6')-I   |
| aac(6')-Ic_1_M94066     | aac(6')-I   |
| aac(6')-Id_1_X12618     | aac(6')-I   |
| aac(6')-If_1_X55353     | aac(6')-I   |
| aac(6')-Ig_1_L09246     | aac(6')-I   |
| aac(6')-Ih_1_L29044     | aac(6')-I   |
| aac(6')-Ii_1_L12710     | aac(6')-I   |
| aac(6')-Ij_1_L29045     | aac(6')-I   |
| aac(6')-Iaa_1_NC_003197 | aac(6')-I   |
| aac(6')-II_1_Z54241     | aac(6')-I   |
| aac(6')-Im_1_AF337947   | aac(6')-I   |
| aac(6')-Iq_1_AF047556   | aac(6')-I   |
| aac(6')-Ir_1_AF031326   | aac(6')-I   |
| aac(6')-Is_1_AF031327   | aac(6')-I   |
| aac(6')-It_1_AF031328   | aac(6')-I   |
| aac(6')-Iu_1_AF031329   | aac(6')-I   |
| aac(6')-Iv_1_AF031330   | aac(6')-I   |
| aac(6')-Iw_1_AF031331   | aac(6')-I   |
| aac(6')-Iy_1_AF144880   | aac(6')-I   |
| aph(9)-Ib_1_U70376      | aph(9)-I    |
| apmA_1_FN806789         | apmA        |
| aac(6')-Ik_1_L29510     | aac(6')-I   |
| aac(3)-Ii_1_CP000356    | aac(3)-I    |
| aac(3)-VIIIa_1_M55426   | aac(3)-VIII |
| aac(6')_1_AY553333      | aac(6')     |

|                                    |                         |
|------------------------------------|-------------------------|
| aac(6')_2_DQ302723                 | aac(6')                 |
| aac(6')_3_EU912537                 | aac(6')                 |
| aacA29_1_AY139599                  | aacA                    |
| aacA43_1_HQ247816                  | aacA                    |
| aac_1_AJ628983                     | aac                     |
| aadA10_1_U37105                    | aadA                    |
| strB_4_FJ474091                    | strB                    |
| strB_4_NC_003384                   | strB                    |
| aph(2'')-Id_1_AF016483             | aph(2'')-I              |
| aph(2'')-Ie_1_AY743255             | aph(2'')-I              |
| aph(3'')-Ia_1_M16482               | aph(3'')-I              |
| aadA16_1_EU675686                  | aadA                    |
| aadA17_1_FJ460181                  | aadA                    |
| aadA1_1_X02340                     | aadA                    |
| aadA1_2_FJ591054                   | aadA                    |
| aadA1_2_JN815078                   | aadA                    |
| aadA1_3_JQ414041                   | aadA                    |
| aadA1_4_M95287                     | aadA                    |
| aadA1_5_JQ480156                   | aadA                    |
| aadA8b_1_AM040708                  | aadA                    |
| aadA9_1_AJ420072                   | aadA                    |
| aac(3)-IIIb_1_L06160               | aac(3)-III              |
| aac(3)-IIIc_1_L06161               | aac(3)-III              |
| aph(3')-VIa_1_X07753               | aph(3')-VI              |
| aac(3)-IIb_1_M97172                | aac(3)-II               |
| aph(3')-Va_1_K00432                | aph(3')-V               |
| aph(3')-Vb_1_M22126                | aph(3')-V               |
| aac(3)-IIe_1_EU022315              | aac(3)-II               |
| aac(3)-IVa_1_X01385                | aac(3)-IV               |
| aadA6_1_AF140629                   | aadA                    |
| aadA7_1_AF224733                   | aadA                    |
| aadA8_1_AF326210                   | aadA                    |
| ant(9)-Ib_1_M69221                 | ant(9)-I                |
| aac(3)-Ib-aac(6')-Ib_1_AF355189    | aac(3)-Ib-aac(6')-I     |
| aadB_1_JN119852                    | aadB                    |
| aadD_1_AF181950                    | aadD                    |
| armA_1_AY220558                    | armA                    |
| strA_1_M96392                      | strA                    |
| strA_2_M28829                      | strA                    |
| ant(3'')-Ih-aac(6')-IId_1_AF453998 | ant(3'')-Ih-aac(6')-IId |
| ant(4')-IIa_1_M98270               | ant(4')-II              |
| ant(4')-IIb_1_AY114142             | ant(4')-II              |
| ant(4')-Ib_1_AJ506108              | ant(4')-I               |
| ant(6)-Ia_1_AF330699               | ant(6)-I                |

|                           |                  |
|---------------------------|------------------|
| ant(6)-Ib_1_FN594949      | ant(6)-I         |
| aac(3)-Ia_1_X15852        | aac(3)-I         |
| strB_3_AF024602           | strB             |
| spc_1_X02588              | spc              |
| str_1_X92946              | str              |
| str_2_FN435330            | str              |
| str_3_AM932524            | str              |
| aph(3'')-Ic_1_DQ336355    | aph(3'')-I       |
| aph(3')-III_1_M26832      | aph(3')-III      |
| aph(3')-IIa_1_X57709      | aph(3')-II       |
| aph(3')-IIb_1_X90856      | aph(3')-II       |
| npmA_1_AB261016           | npmA             |
| aac(3)-IXa_1_M55427       | aac(3)-IX        |
| aac(3)-I_1_AJ877225       | aac(3)-I         |
| strB_2_M28829             | strB             |
| rmtD2_1_HQ401565          | rmtD             |
| rmtD_1_DQ914960           | rmtD             |
| spc_2_U50980              | spc              |
| sph_1_HQ424461            | sph              |
| aac(6')-aph(2'')_1_M13771 | aac(6')-aph(2'') |
| aac(3)-IIa_1_X51534       | aac(3)-II        |
| strA_5_AF321550           | strA             |
| aac(3)-IIc_1_X54723       | aac(3)-II        |
| aac(3)-IId_1_EU022314     | aac(3)-II        |
| rmtA_1_AB120321           | rmtA             |
| strA_4_NC_003384          | strA             |
| strB_1_M96392             | strB             |
| rmtC_1_AB194779           | rmtC             |
| aac(6')-Iz_1_AF140221     | aac(6')-I        |
| rmtE_1_GU201947           | rmtE             |
| strA_3_AF024602           | strA             |
| strA_4_AF321551           | strA             |
| rmtB_1_AB103506           | rmtB             |
| POM-1_1_GU002295          | POM-1            |
| blaGOB-14_1_AY647252      | blaGOB           |
| blaGOB-15_1_AY775547      | blaGOB           |
| blaGOB-16_1_GU188443      | blaGOB           |
| blaGOB-16_2_AY899331      | blaGOB           |
| blaGOB-17_1_AY899332      | blaGOB           |
| blaGOB-18_1_DQ004496      | blaGOB           |
| blaGOB-1_1_EF394442       | blaGOB           |
| blaGOB-1_2_AF090141       | blaGOB           |
| blaGOB-2_1_AF189296       | blaGOB           |
| blaGOB-3_1_AF189291       | blaGOB           |

|                      |         |
|----------------------|---------|
| blaGOB-4_1_AF189293  | blaGOB  |
| blaGOB-5_1_AF189290  | blaGOB  |
| blaGOB-6_1_AF189292  | blaGOB  |
| blaGOB-7_1_AF189297  | blaGOB  |
| blaGOB-8_1_AY348327  | blaGOB  |
| blaGOB-9_1_AY647246  | blaGOB  |
| blaHERA-1_1_AF311385 | blaHERA |
| blaHERA-2_1_AF398334 | blaHERA |
| blaHERA-3_1_AF398335 | blaHERA |
| blaHERA-4_1_AJ536088 | blaHERA |
| blaHERA-5_1_AJ536089 | blaHERA |
| ACC-1_2_AM939420     | blaACC  |
| blaACC-2_1_AF180952  | blaACC  |
| blaACC-3_1_AF180958  | blaACC  |
| blaACC-4_1_GU256641  | blaACC  |
| blaACI-1_1_AJ007350  | blaACI  |
| blaACT-10_1_JN848330 | blaACT  |
| blaACT-12_1_JX440355 | blaACT  |
| blaACT-14_1_JX440354 | blaACT  |
| blaACT-15_1_JX440356 | blaACT  |
| blaACT-16_1_AB737978 | blaACT  |
| blaACT-1_1_U58495    | blaACT  |
| blaACT-2_1_AM076977  | blaACT  |
| blaACT-3_1_EF125013  | blaACT  |
| blaACT-4_2_AJ311172  | blaACT  |
| blaACT-5_1_FJ237369  | blaACT  |
| blaACT-6_1_FJ237366  | blaACT  |
| blaACT-7_1_FJ237368  | blaACT  |
| blaACT-9_1_HQ693810  | blaACT  |
| blaADC-25_1_EF016355 | blaADC  |
| blaAER-1_1_U14748    | blaAER  |
| blaAST-1_1_AF279904  | blaAST  |
| blaA_1_DQ424965      | blaA    |
| blaA_2_AY954728      | blaA    |
| blaB-10_1_AY348325   | blaB    |
| blaB-11_1_AY348326   | blaB    |
| blaB-12_1_EF595958   | blaB    |
| blaB-13_1_EF595959   | blaB    |
| blaB-14_1_JN635697   | blaB    |
| blaB-2_1_AF189300    | blaB    |
| blaB-3_1_AF189301    | blaB    |
| blaB-3_2_AF189299    | blaB    |
| blaB-5_1_AF189303    | blaB    |
| blaB-6_1_AF189302    | blaB    |

|                       |         |
|-----------------------|---------|
| blaB-7_1_AF189304     | blaB    |
| blaB-8_1_AF189305     | blaB    |
| blaB-9_1_AY348324     | blaB    |
| blaBEL-1_1_DQ089809   | blaBEL  |
| blaBEL-2_1_FJ666063   | blaBEL  |
| blaBEL-3_1_GQ202694   | blaBEL  |
| blaBES-1_1_AF234999   | blaBES  |
| blaBIC-1_1_GQ260093   | blaBIC  |
| blaBIL-1_1_X74512     | blaBIL  |
| blaCARB-10_1_EU850412 | blaCARB |
| blaCARB-11_1_AY008290 | blaCARB |
| blaCARB-12_1_D13210   | blaCARB |
| blaCARB-1_1_AF313471  | blaCARB |
| blaCARB-2_1_M69058    | blaCARB |
| blaCARB-3_1_S46063    | blaCARB |
| blaCARB-4_1_U14749    | blaCARB |
| blaCARB-5_1_AF135373  | blaCARB |
| blaCARB-6_1_AF030945  | blaCARB |
| blaCARB-7_1_AF409092  | blaCARB |
| blaCARB-8_1_AY178993  | blaCARB |
| blaCARB-9_1_AY248038  | blaCARB |
| blaCEPH-A3_1_AY112998 | blaCEPH |
| blaCFE-1_1_AB107899   | blaCFE  |
| blaCGB-1_1_EF672680   | blaCGB  |
| blaCKO-1_1_AF477396   | blaCKO  |
| blaCME-1_1_AJ006275   | blaCME  |
| blaCMG_1_AY265892     | blaCMG  |
| blaCMY-104_1_KF150216 | blaCMY  |
| blaCMY-10_1_AF373218  | blaCMY  |
| blaCMY-110_1_AB872957 | blaCMY  |
| blaCMY-11_1_AF381626  | blaCMY  |
| blaCMY-12_1_Y16785    | blaCMY  |
| blaCMY-13_1_AY339625  | blaCMY  |
| blaCMY-14_1_EU600193  | blaCMY  |
| blaCMY-14_2_AJ555825  | blaCMY  |
| blaCMY-15_1_AJ555823  | blaCMY  |
| blaCMY-16_1_FM995219  | blaCMY  |
| blaCMY-16_2_FJ855437  | blaCMY  |
| blaCMY-17_1_AY513266  | blaCMY  |
| blaCMY-18_1_AY743434  | blaCMY  |
| blaCMY-19_1_AB194410  | blaCMY  |
| blaCMY-1_1_X92508     | blaCMY  |
| blaCMY-20_1_AY960293  | blaCMY  |
| blaCMY-21_1_DQ139328  | blaCMY  |

|                      |        |
|----------------------|--------|
| blaCMY-22_1_DQ256079 | blaCMY |
| blaCMY-23_1_DQ438952 | blaCMY |
| blaCMY-24_1_EF415650 | blaCMY |
| blaCMY-25_1_EU515249 | blaCMY |
| blaCMY-26_1_AB300358 | blaCMY |
| blaCMY-27_1_EU515250 | blaCMY |
| blaCMY-28_1_EF561644 | blaCMY |
| blaCMY-29_1_EF685371 | blaCMY |
| blaCMY-2_1_X91840    | blaCMY |
| blaCMY-30_1_EF685372 | blaCMY |
| blaCMY-31_1_EU331425 | blaCMY |
| blaCMY-32_1_EU496815 | blaCMY |
| blaCMY-33_1_EU496816 | blaCMY |
| blaCMY-34_1_EF394370 | blaCMY |
| blaCMY-35_1_EF394371 | blaCMY |
| blaCMY-36_1_EU331426 | blaCMY |
| blaCMY-37_1_AB280919 | blaCMY |
| blaCMY-38_1_AM931008 | blaCMY |
| blaCMY-39_1_HM565135 | blaCMY |
| blaCMY-3_1_Y16783    | blaCMY |
| blaCMY-40_1_EU515251 | blaCMY |
| blaCMY-41_1_AB429270 | blaCMY |
| blaCMY-42_1_HM146927 | blaCMY |
| blaCMY-43_1_HQ267530 | blaCMY |
| blaCMY-44_1_FJ437066 | blaCMY |
| blaCMY-45_1_FN546177 | blaCMY |
| blaCMY-46_1_FN556186 | blaCMY |
| blaCMY-47_1_HM046998 | blaCMY |
| blaCMY-48_1_HM569226 | blaCMY |
| blaCMY-49_1_GQ402541 | blaCMY |
| blaCMY-4_1_AF420597  | blaCMY |
| blaCMY-51_1_JQ733571 | blaCMY |
| blaCMY-53_1_HQ336940 | blaCMY |
| blaCMY-54_1_HM544039 | blaCMY |
| blaCMY-55_1_HM544040 | blaCMY |
| blaCMY-56_1_HQ322613 | blaCMY |
| blaCMY-57_1_HQ285243 | blaCMY |
| blaCMY-58_1_HQ185697 | blaCMY |
| blaCMY-59_2_AB587082 | blaCMY |
| blaCMY-5_1_Y17716    | blaCMY |
| blaCMY-60_1_HQ267531 | blaCMY |
| blaCMY-61_1_JF460795 | blaCMY |
| blaCMY-62_1_JF460796 | blaCMY |
| blaCMY-63_1_HQ650104 | blaCMY |

|                         |          |
|-------------------------|----------|
| blaCMY-64_1_HQ832678    | blaCMY   |
| blaCMY-65_1_JF780936    | blaCMY   |
| blaCMY-66_1_JN714478    | blaCMY   |
| blaCMY-67_1_JQ711185    | blaCMY   |
| blaCMY-68_1_JN714480    | blaCMY   |
| blaCMY-69_1_JX049132    | blaCMY   |
| blaCMY-6_1_AJ011293     | blaCMY   |
| blaCMY-70_1_JX440350    | blaCMY   |
| blaCMY-71_1_JQ711184    | blaCMY   |
| blaCMY-72_1_JX440352    | blaCMY   |
| blaCMY-73_1_GQ351345    | blaCMY   |
| blaCMY-74_1_JX440349    | blaCMY   |
| blaCMY-75_1_JQ733572    | blaCMY   |
| blaCMY-76_1_JQ733573    | blaCMY   |
| blaCMY-77_1_JX440353    | blaCMY   |
| blaCMY-78_1_JQ733575    | blaCMY   |
| blaCMY-79_1_JQ733576    | blaCMY   |
| blaCMY-7_1_AY324388     | blaCMY   |
| blaCMY-80_1_JQ733577    | blaCMY   |
| blaCMY-81_1_JQ733578    | blaCMY   |
| blaCMY-83_1_JX440351    | blaCMY   |
| blaCMY-84_1_JQ733579    | blaCMY   |
| blaCMY-87_1_AB699171    | blaCMY   |
| blaCMY-8_1_EF382672     | blaCMY   |
| blaCMY-8_2_DQ094251     | blaCMY   |
| blaCMY-94_1_JX514368    | blaCMY   |
| blaCMY-95_1_JX514369    | blaCMY   |
| blaCMY-98_1_KC603538    | blaCMY   |
| blaCMY-99_1_KF305673    | blaCMY   |
| blaCMY-9_1_AB061794     | blaCMY   |
| blaCTX-M-100_1_FR682582 | blaCTX-M |
| blaCTX-M-101_1_HQ398214 | blaCTX-M |
| blaCTX-M-102_1_HQ398215 | blaCTX-M |
| blaCTX-M-103_1_HG423149 | blaCTX-M |
| blaCTX-M-104_1_HQ833652 | blaCTX-M |
| blaCTX-M-105_1_HQ833651 | blaCTX-M |
| blaCTX-M-106_1_HQ913565 | blaCTX-M |
| blaCTX-M-10_1_AY598759  | blaCTX-M |
| blaCTX-M-110_1_JF274242 | blaCTX-M |
| blaCTX-M-111_1_JF274243 | blaCTX-M |
| blaCTX-M-112_1_JF274246 | blaCTX-M |
| blaCTX-M-113_1_JF274247 | blaCTX-M |
| blaCTX-M-114_1_GQ351346 | blaCTX-M |
| blaCTX-M-116_1_JF966749 | blaCTX-M |

|                         |          |
|-------------------------|----------|
| blaCTX-M-117_1_JN227085 | blaCTX-M |
| blaCTX-M-11_1_AJ310929  | blaCTX-M |
| blaCTX-M-121_1_JN790862 | blaCTX-M |
| blaCTX-M-122_1_JN790863 | blaCTX-M |
| blaCTX-M-123_1_JN790864 | blaCTX-M |
| blaCTX-M-124_1_JQ429324 | blaCTX-M |
| blaCTX-M-125_1_JQ724542 | blaCTX-M |
| blaCTX-M-126_1_AB703103 | blaCTX-M |
| blaCTX-M-129_1_JX017364 | blaCTX-M |
| blaCTX-M-12_1_DQ821704  | blaCTX-M |
| blaCTX-M-130_1_JX017365 | blaCTX-M |
| blaCTX-M-131_1_JN969893 | blaCTX-M |
| blaCTX-M-132_1_JX313020 | blaCTX-M |
| blaCTX-M-134_1_JX896165 | blaCTX-M |
| blaCTX-M-136_1_KC351754 | blaCTX-M |
| blaCTX-M-139_1_KC107824 | blaCTX-M |
| blaCTX-M-13_2_AF252623  | blaCTX-M |
| blaCTX-M-142_1_KF240809 | blaCTX-M |
| blaCTX-M-147_1_KF513180 | blaCTX-M |
| blaCTX-M-14_4_EU274579  | blaCTX-M |
| blaCTX-M-14_5_AJ416341  | blaCTX-M |
| blaCTX-M-15_23_DQ302097 | blaCTX-M |
| blaCTX-M-15_64_FJ815288 | blaCTX-M |
| blaCTX-M-15_70_FJ815277 | blaCTX-M |
| blaCTX-M-16_1_AY029068  | blaCTX-M |
| blaCTX-M-17_1_AY033516  | blaCTX-M |
| blaCTX-M-17_2_AF454633  | blaCTX-M |
| blaCTX-M-18_1_AF325133  | blaCTX-M |
| blaCTX-M-19_1_AF325134  | blaCTX-M |
| blaCTX-M-1_4_AJ416342   | blaCTX-M |
| blaCTX-M-1_6_DQ915955   | blaCTX-M |
| blaCTX-M-20_1_AJ416344  | blaCTX-M |
| blaCTX-M-21_1_AJ416346  | blaCTX-M |
| blaCTX-M-22_1_HM470254  | blaCTX-M |
| blaCTX-M-22_3_EU376964  | blaCTX-M |
| blaCTX-M-23_1_AF488377  | blaCTX-M |
| blaCTX-M-24_1_EU921824  | blaCTX-M |
| blaCTX-M-24_2_EF570050  | blaCTX-M |
| blaCTX-M-24_8_EF374096  | blaCTX-M |
| blaCTX-M-25_1_AF518567  | blaCTX-M |
| blaCTX-M-26_1_AY455830  | blaCTX-M |
| blaCTX-M-27_1_EU916273  | blaCTX-M |
| blaCTX-M-28_6_AJ549244  | blaCTX-M |
| blaCTX-M-29_1_AY267213  | blaCTX-M |

|                         |          |
|-------------------------|----------|
| blaCTX-M-2_1_EU622041   | blaCTX-M |
| blaCTX-M-30_1_AY292654  | blaCTX-M |
| blaCTX-M-31_1_AJ567481  | blaCTX-M |
| blaCTX-M-32_2_AM420303  | blaCTX-M |
| blaCTX-M-33_1_AY238472  | blaCTX-M |
| blaCTX-M-34_1_AY515297  | blaCTX-M |
| blaCTX-M-35_1_AB176534  | blaCTX-M |
| blaCTX-M-36_1_AB177384  | blaCTX-M |
| blaCTX-M-37_2_FN813246  | blaCTX-M |
| blaCTX-M-38_1_AY753197  | blaCTX-M |
| blaCTX-M-39_1_AY954516  | blaCTX-M |
| blaCTX-M-3_2_EF437434   | blaCTX-M |
| blaCTX-M-3_8_EF382672   | blaCTX-M |
| blaCTX-M-40_1_AY750914  | blaCTX-M |
| blaCTX-M-41_1_DQ023162  | blaCTX-M |
| blaCTX-M-42_1_DQ061159  | blaCTX-M |
| blaCTX-M-43_1_DQ102702  | blaCTX-M |
| blaCTX-M-44_1_D37830    | blaCTX-M |
| blaCTX-M-45_1_D89862    | blaCTX-M |
| blaCTX-M-46_1_AY847147  | blaCTX-M |
| blaCTX-M-47_1_AY847143  | blaCTX-M |
| blaCTX-M-48_1_AY847144  | blaCTX-M |
| blaCTX-M-49_1_AY847145  | blaCTX-M |
| blaCTX-M-4_1_Y14156     | blaCTX-M |
| blaCTX-M-50_1_AY847146  | blaCTX-M |
| blaCTX-M-51_1_DQ211987  | blaCTX-M |
| blaCTX-M-52_1_GU125667  | blaCTX-M |
| blaCTX-M-53_1_DQ268764  | blaCTX-M |
| blaCTX-M-54_1_DQ303459  | blaCTX-M |
| blaCTX-M-55_2_GQ456159  | blaCTX-M |
| blaCTX-M-56_1_EF374097  | blaCTX-M |
| blaCTX-M-58_1_EF210159  | blaCTX-M |
| blaCTX-M-59_1_EU622856  | blaCTX-M |
| blaCTX-M-5_6_AF286192   | blaCTX-M |
| blaCTX-M-5_8_AJ005045   | blaCTX-M |
| blaCTX-M-60_1_AM411407  | blaCTX-M |
| blaCTX-M-61_1_EF219142  | blaCTX-M |
| blaCTX-M-62_1_EF219134  | blaCTX-M |
| blaCTX-M-63_1_EU660216  | blaCTX-M |
| blaCTX-M-64_1_GQ456156  | blaCTX-M |
| blaCTX-M-65_11_FJ907380 | blaCTX-M |
| blaCTX-M-65_2_GQ456158  | blaCTX-M |
| blaCTX-M-66_1_EF576988  | blaCTX-M |
| blaCTX-M-67_1_EF581888  | blaCTX-M |

|                        |          |
|------------------------|----------|
| blaCTX-M-68_1_EU177100 | blaCTX-M |
| blaCTX-M-69_1_EU402393 | blaCTX-M |
| blaCTX-M-6_1_AJ005044  | blaCTX-M |
| blaCTX-M-71_1_FJ815436 | blaCTX-M |
| blaCTX-M-72_1_AY847148 | blaCTX-M |
| blaCTX-M-74_1_GQ149243 | blaCTX-M |
| blaCTX-M-75_1_GQ149244 | blaCTX-M |
| blaCTX-M-76_1_AM982520 | blaCTX-M |
| blaCTX-M-77_1_AM982521 | blaCTX-M |
| blaCTX-M-78_1_AM982522 | blaCTX-M |
| blaCTX-M-79_1_GU125666 | blaCTX-M |
| blaCTX-M-80_1_EU202673 | blaCTX-M |
| blaCTX-M-81_1_EU136031 | blaCTX-M |
| blaCTX-M-82_1_DQ256091 | blaCTX-M |
| blaCTX-M-83_1_FJ214366 | blaCTX-M |
| blaCTX-M-84_1_FJ214367 | blaCTX-M |
| blaCTX-M-85_1_FJ214368 | blaCTX-M |
| blaCTX-M-86_1_FJ214369 | blaCTX-M |
| blaCTX-M-87_1_EU545409 | blaCTX-M |
| blaCTX-M-88_1_FJ873739 | blaCTX-M |
| blaCTX-M-89_1_FJ966096 | blaCTX-M |
| blaCTX-M-89_2_FJ971899 | blaCTX-M |
| blaCTX-M-8_1_AF189721  | blaCTX-M |
| blaCTX-M-90_1_FJ907381 | blaCTX-M |
| blaCTX-M-91_1_GQ870432 | blaCTX-M |
| blaCTX-M-92_1_GU127598 | blaCTX-M |
| blaCTX-M-93_1_HQ166709 | blaCTX-M |
| blaCTX-M-94_1_HM167760 | blaCTX-M |
| blaCTX-M-95_1_FN813245 | blaCTX-M |
| blaCTX-M-96_1_AJ704396 | blaCTX-M |
| blaCTX-M-97_1_HM776707 | blaCTX-M |
| blaCTX-M-98_1_HM755448 | blaCTX-M |
| blaCTX-M-99_1_HM803271 | blaCTX-M |
| blaCTX-M-9_1_AF174129  | blaCTX-M |
| blaCTX-M-9_7_AJ416345  | blaCTX-M |
| blaDES-1_1_AF426161    | blaDES   |
| blaDHA-1_1_Y16410      | blaDHA   |
| blaDHA-2_1_AF259520    | blaDHA   |
| blaDHA-3_1_AY494945    | blaDHA   |
| blaDHA-5_1_JF273491    | blaDHA   |
| blaDHA-6_1_HQ322612    | blaDHA   |
| blaDHA-7_1_HQ456945    | blaDHA   |
| blaDIM-1_1_GU323019    | blaDIM   |
| blaEBR-1_1_AF416700    | blaEBR   |

|                      |         |
|----------------------|---------|
| blaERP-1_1_AY077733  | blaERP  |
| blaFAR-1_1_AF024601  | blaFAR  |
| blaFONA-1_1_AJ251239 | blaFONA |
| blaFONA-2_1_AJ251240 | blaFONA |
| blaFONA-3_1_AJ251241 | blaFONA |
| blaFONA-4_1_AJ251242 | blaFONA |
| blaFONA-5_1_AJ251243 | blaFONA |
| blaFONA-6_1_AJ251244 | blaFONA |
| blaFOX-10_1_JX049131 | blaFOX  |
| blaFOX-1_1_X77455    | blaFOX  |
| blaFOX-2_1_Y10282    | blaFOX  |
| blaFOX-3_1_Y11068    | blaFOX  |
| blaFOX-4_1_AJ277535  | blaFOX  |
| blaFOX-5_1_AY007369  | blaFOX  |
| blaFOX-6_1_AY034848  | blaFOX  |
| blaFOX-7_1_AJ703796  | blaFOX  |
| blaFOX-8_1_HM565917  | blaFOX  |
| blaFOX-9_1_JF896803  | blaFOX  |
| blaGES-10_1_FJ820124 | blaGES  |
| blaGES-11_1_FJ854362 | blaGES  |
| blaGES-12_1_FN554543 | blaGES  |
| blaGES-13_1_GU169702 | blaGES  |
| blaGES-14_1_GU207844 | blaGES  |
| blaGES-15_1_GU208678 | blaGES  |
| blaGES-16_1_HM173356 | blaGES  |
| ampH_1_AJ276031      | ampH    |
| ampH_2_HQ586946      | ampH    |
| ampS_1_X80276        | ampS    |
| blaGES-1_1_HQ170511  | blaGES  |
| blaGES-20_1_JN596280 | blaGES  |
| blaGES-21_1_JQ772478 | blaGES  |
| blaGES-22_1_JX023441 | blaGES  |
| blaGES-23_1_KF179354 | blaGES  |
| blaGES-2_1_AF326355  | blaGES  |
| blaGES-3_1_AB113580  | blaGES  |
| blaGES-4_1_AB116723  | blaGES  |
| blaGES-5_1_DQ236171  | blaGES  |
| blaGES-6_1_AY494718  | blaGES  |
| blaGES-7_1_HM453325  | blaGES  |
| blaGES-8_1_AF329699  | blaGES  |
| blaGES-9_1_AY920928  | blaGES  |
| blaGIM-1_1_JF414726  | blaGIM  |
| blaGOB-10_1_AY647247 | blaGOB  |
| blaGOB-11_1_AY647248 | blaGOB  |

|                       |         |
|-----------------------|---------|
| blaGOB-12_1_AY647249  | blaGOB  |
| blaGOB-13_1_AY647251  | blaGOB  |
| blaOXA-326_1_KF203100 | blaOXA  |
| blaOXA-327_1_KF203101 | blaOXA  |
| blaOXA-328_1_KF203102 | blaOXA  |
| blaOXA-329_1_KF203103 | blaOXA  |
| blaOXA-32_1_AF315351  | blaOXA  |
| blaOXA-330_1_KF203104 | blaOXA  |
| blaOXA-331_1_KF203105 | blaOXA  |
| blaOXA-332_1_KF203106 | blaOXA  |
| blaOXA-333_1_KF203107 | blaOXA  |
| blaOXA-334_1_KF203108 | blaOXA  |
| blaOXA-335_1_KF203109 | blaOXA  |
| blaOXA-33_1_AY008291  | blaOXA  |
| blaOXA-347_1_JN086160 | blaOXA  |
| blaOXA-348_1_KF297577 | blaOXA  |
| blaOXA-349_1_KF297578 | blaOXA  |
| blaOXA-34_1_AF350424  | blaOXA  |
| blaOXA-350_1_KF297579 | blaOXA  |
| blaOXA-351_1_KF297580 | blaOXA  |
| blaOXA-352_1_KF297581 | blaOXA  |
| blaOXA-353_1_KF297582 | blaOXA  |
| blaOXA-354_1_KF297583 | blaOXA  |
| blaHERA-6_1_AJ536090  | blaHERA |
| blaHERA-8_1_AJ536092  | blaHERA |
| blaIMI-1_1_U50278     | blaIMI  |
| blaIMI-2_1_DQ173429   | blaIMI  |
| blaIMI-3_1_GU015024   | blaIMI  |
| blaIMP-10_1_AB195637  | blaIMP  |
| blaIMP-11_1_AB074436  | blaIMP  |
| blaIMP-12_3_AJ420864  | blaIMP  |
| blaIMP-13_1_AJ512502  | blaIMP  |
| blaIMP-14_1_AY553332  | blaIMP  |
| blaIMP-15_1_EF184216  | blaIMP  |
| blaIMP-16_1_AJ584652  | blaIMP  |
| blaIMP-18_1_EF184215  | blaIMP  |
| blaIMP-19_1_EF118171  | blaIMP  |
| blaIMP-1_1_DQ522237   | blaIMP  |
| blaIMP-20_1_AB196988  | blaIMP  |
| blaIMP-21_1_AB204557  | blaIMP  |
| blaIMP-22_2_DQ361087  | blaIMP  |
| blaIMP-24_1_EF192154  | blaIMP  |
| blaIMP-25_1_HM175876  | blaIMP  |
| blaIMP-26_1_GU045307  | blaIMP  |

|                      |         |
|----------------------|---------|
| blaIMP-27_1_JF894248 | blaIMP  |
| blaIMP-28_1_JQ407409 | blaIMP  |
| blaIMP-29_1_HQ438058 | blaIMP  |
| blaIMP-2_1_AJ243491  | blaIMP  |
| blaIMP-30_1_DQ522237 | blaIMP  |
| blaIMP-31_1_KF148593 | blaIMP  |
| blaIMP-32_1_JQ002629 | blaIMP  |
| blaIMP-33_1_JN848782 | blaIMP  |
| blaIMP-34_1_AB715422 | blaIMP  |
| blaIMP-35_1_JF816544 | blaIMP  |
| blaIMP-37_1_JX131372 | blaIMP  |
| blaIMP-38_1_HQ875573 | blaIMP  |
| blaIMP-3_1_AB010417  | blaIMP  |
| blaIMP-40_1_AB753457 | blaIMP  |
| blaIMP-41_1_AB753458 | blaIMP  |
| blaIMP-42_1_AB753456 | blaIMP  |
| blaIMP-43_1_AB777500 | blaIMP  |
| blaIMP-44_1_AB777501 | blaIMP  |
| blaIMP-4_1_DQ307573  | blaIMP  |
| blaIMP-5_1_JF810083  | blaIMP  |
| blaIMP-6_1_AB188812  | blaIMP  |
| blaIMP-7_1_AF318077  | blaIMP  |
| blaIMP-8_1_EU042136  | blaIMP  |
| blaIMP-9_1_AY033653  | blaIMP  |
| blaIND-10_1_GU206353 | blaIND  |
| blaIND-11_1_HM245379 | blaIND  |
| blaIND-12_1_HM245380 | blaIND  |
| blaIND-14_1_HM367709 | blaIND  |
| blaIND-15_1_AB563173 | blaIND  |
| blaIND-1_1_AF099139  | blaIND  |
| blaIND-2_2_AF219127  | blaIND  |
| blaIND-2a_4_AF219130 | blaIND  |
| blaIND-2b_3_EF672681 | blaIND  |
| blaIND-2c_1_GU186042 | blaIND  |
| blaIND-3_1_AF219131  | blaIND  |
| blaIND-4_1_AF219135  | blaIND  |
| blaIND-5_1_AY504627  | blaIND  |
| blaIND-6_1_AM087455  | blaIND  |
| blaIND-7_1_AB529520  | blaIND  |
| blaIND-8_1_GU186044  | blaIND  |
| blaIND-9_1_GU186045  | blaIND  |
| blaJOHN-1_1_AY028464 | blaJOHN |
| blaKHM-1_1_AB364006  | blaKHM  |
| blaKPC-10_1_GQ140348 | blaKPC  |

|                      |        |
|----------------------|--------|
| blaKPC-11_1_HM066995 | blaKPC |
| blaKPC-12_1_HQ342889 | blaKPC |
| blaKPC-13_1_HQ342890 | blaKPC |
| blaKPC-14_1_JX524191 | blaKPC |
| blaKPC-15_1_KC433553 | blaKPC |
| blaKPC-16_1_KC465199 | blaKPC |
| blaKPC-1_1_AF297554  | blaKPC |
| blaKPC-2_1_AY034847  | blaKPC |
| blaKPC-3_1_HM769262  | blaKPC |
| blaKPC-4_1_AY700571  | blaKPC |
| blaKPC-4_1_FJ473382  | blaKPC |
| blaKPC-5_1_EU400222  | blaKPC |
| blaKPC-6_1_EU555534  | blaKPC |
| blaKPC-7_1_EU729727  | blaKPC |
| blaKPC-8_1_FJ234412  | blaKPC |
| blaKPC-9_1_FJ624872  | blaKPC |
| blaL1_3_EF126059     | blaL   |
| blaLAT-1_1_X78117    | blaLAT |
| blaLCR-1_1_X56809    | blaLCR |
| blaLEN10_1_AJ635419  | blaLEN |
| blaLEN11_1_AJ635417  | blaLEN |
| blaLEN12_1_AJ635406  | blaLEN |
| blaLEN13_1_AJ635403  | blaLEN |
| blaLEN15_1_AF452105  | blaLEN |
| blaLEN16_1_AY743416  | blaLEN |
| blaLEN17_1_EF205593  | blaLEN |
| blaLEN18_1_AM850908  | blaLEN |
| blaLEN19_1_AM850909  | blaLEN |
| blaLEN1_1_X04515     | blaLEN |
| blaLEN20_1_AM850910  | blaLEN |
| blaLEN21_1_AM850911  | blaLEN |
| blaLEN22_1_AM850912  | blaLEN |
| blaLEN23_1_AM850913  | blaLEN |
| blaLEN24_1_AM850914  | blaLEN |
| blaLEN25_1_HQ709169  | blaLEN |
| blaLEN26_1_JQ067123  | blaLEN |
| blaLEN2_1_AY037780   | blaLEN |
| blaLEN3_1_AY130286   | blaLEN |
| blaLEN4_1_AY130287   | blaLEN |
| blaLEN5_1_AY633109   | blaLEN |
| blaLEN7_1_AJ635425   | blaLEN |
| blaLEN8_1_AJ635424   | blaLEN |
| blaLEN9_1_AJ635405   | blaLEN |
| blaLUT-1_1_AY695112  | blaLUT |

|                        |          |
|------------------------|----------|
| blaMAL-1_1_AJ277209    | blaMAL   |
| blaMAL-1_2_AJ609506    | blaMAL   |
| blaMIR-1_1_M37839      | blaMIR   |
| blaMIR-2_1_AY227752    | blaMIR   |
| blaMIR-3_1_AY743435    | blaMIR   |
| blaMIR-4_1_EF417572    | blaMIR   |
| blaMIR-5_1_FJ237367    | blaMIR   |
| blaMIR-6_1_JQ664733    | blaMIR   |
| blaMOR-2_1_AY235804    | blaMOR   |
| blaMOR_1_Y10283        | blaMOR   |
| blaMOX-1_1_D13304      | blaMOX   |
| blaMOX-2_1_AJ276453    | blaMOX   |
| blaMOX-3_1_EU515248    | blaMOX   |
| blaMOX-4_1_FJ262599    | blaMOX   |
| blaMOX-5_1_GQ152600    | blaMOX   |
| blaMOX-6_1_GQ152601    | blaMOX   |
| blaMOX-7_1_GQ152602    | blaMOX   |
| blaMUS-1_1_AF441286    | blaMUS   |
| blaNDM-1_1_FN396876    | blaNDM   |
| blaNDM-2_1_JF703135    | blaNDM   |
| blaNDM-3_1_JQ734687    | blaNDM   |
| blaNDM-4_1_JQ348841    | blaNDM   |
| blaNDM-5_1_JN104597    | blaNDM   |
| blaNDM-6_1_JN967644    | blaNDM   |
| blaNDM-7_1_JX262694    | blaNDM   |
| blaNDM-8_1_AB744718    | blaNDM   |
| blaNDM-9_1_KC999080    | blaNDM   |
| blaNMC-A_1_AJ536087    | blaNMC-A |
| blaNPS_1_AY027589      | blaNPS   |
| blaOCH-2_1_AJ295340    | blaOCH   |
| blaOCH-3_1_AJ295341    | blaOCH   |
| blaOCH-4_1_AJ295342    | blaOCH   |
| blaOCH-5_1_AJ295343    | blaOCH   |
| blaOCH-6_1_AJ295344    | blaOCH   |
| blaOCH-7_1_AJ295345    | blaOCH   |
| blaOCH-8_1_DQ489307    | blaOCH   |
| blaOKP-A-10_1_AM051149 | blaOKP-A |
| blaOKP-A-11_1_AM850915 | blaOKP-A |
| blaOKP-A-12_1_AM850915 | blaOKP-A |
| blaOKP-A-13_1_FJ534513 | blaOKP-A |
| blaOKP-A-14_1_FJ534512 | blaOKP-A |
| blaOKP-A-15_1_FJ755841 | blaOKP-A |
| blaOKP-A-16_1_FJ755840 | blaOKP-A |
| blaOKP-A-1_1_AM051138  | blaOKP-A |

|                        |          |
|------------------------|----------|
| blaOKP-A-2_1_AM051139  | blaOKP-A |
| blaOKP-A-3_1_AM051140  | blaOKP-A |
| blaOKP-A-4_1_AM051142  | blaOKP-A |
| blaOKP-A-5_1_AM051143  | blaOKP-A |
| blaOKP-A-6_1_AM051144  | blaOKP-A |
| blaOKP-A-7_1_AM051145  | blaOKP-A |
| blaOKP-A-8_1_AM051147  | blaOKP-A |
| blaOKP-A-9_1_AM051148  | blaOKP-A |
| blaOKP-B-10_1_AM051160 | blaOKP-B |
| blaOKP-B-11_1_AM051161 | blaOKP-B |
| blaOKP-B-12_1_AJ635420 | blaOKP-B |
| blaOKP-B-13_1_AY825330 | blaOKP-B |
| blaOKP-B-14_1_DQ995288 | blaOKP-B |
| blaOKP-B-15_1_AM850917 | blaOKP-B |
| blaOKP-B-16_1_AM850918 | blaOKP-B |
| blaOKP-B-17_1_AM850919 | blaOKP-B |
| blaOKP-B-18_1_AM850920 | blaOKP-B |
| blaOKP-B-19_1_AM850921 | blaOKP-B |
| blaOKP-B-1_1_AM051150  | blaOKP-B |
| blaOKP-B-20_1_AM850922 | blaOKP-B |
| blaOKP-B-2_1_AM051151  | blaOKP-B |
| blaOKP-B-3_1_AM051152  | blaOKP-B |
| blaOKP-B-4_1_AM051153  | blaOKP-B |
| blaOKP-B-5_1_AY512506  | blaOKP-B |
| blaOKP-B-6_1_AY850171  | blaOKP-B |
| blaOKP-B-7_1_AM051156  | blaOKP-B |
| blaOKP-B-8_1_AM051157  | blaOKP-B |
| blaOKP-B-9_1_AM051159  | blaOKP-B |
| blaOXA-100_1_AM231720  | blaOXA   |
| blaOXA-101_1_AM412777  | blaOXA   |
| blaOXA-104_1_EF581285  | blaOXA   |
| blaOXA-106_1_EF650032  | blaOXA   |
| blaOXA-107_1_EF650033  | blaOXA   |
| blaOXA-108_1_EF650034  | blaOXA   |
| blaOXA-109_1_EF650035  | blaOXA   |
| blaOXA-10_1_HM175875   | blaOXA   |
| blaOXA-10_2_EU886981   | blaOXA   |
| blaOXA-110_1_EF650036  | blaOXA   |
| blaOXA-111_1_EF650037  | blaOXA   |
| blaOXA-112_1_EF650038  | blaOXA   |
| blaOXA-113_1_EF653400  | blaOXA   |
| blaOXA-114_1_HM368376  | blaOXA   |
| blaOXA-114_2_HM368375  | blaOXA   |
| blaOXA-114_3_HM104634  | blaOXA   |

|                       |        |
|-----------------------|--------|
| blaOXA-114_4_HM104633 | blaOXA |
| blaOXA-114_5_HM056041 | blaOXA |
| blaOXA-114_6_HM056040 | blaOXA |
| blaOXA-115_1_EU029998 | blaOXA |
| blaOXA-116_1_EU220744 | blaOXA |
| blaOXA-117_1_GQ423625 | blaOXA |
| blaOXA-117_2_EU220745 | blaOXA |
| blaOXA-118_1_AF371964 | blaOXA |
| blaOXA-119_1_AY139598 | blaOXA |
| blaOXA-11_1_Z22590    | blaOXA |
| blaOXA-120_1_HE963768 | blaOXA |
| blaOXA-128_1_EU375515 | blaOXA |
| blaOXA-129_1_AM932669 | blaOXA |
| blaOXA-12_1_U10251    | blaOXA |
| blaOXA-130_1_EU547445 | blaOXA |
| blaOXA-131_1_EU547446 | blaOXA |
| blaOXA-132_1_EU547447 | blaOXA |
| blaOXA-133_1_EU571228 | blaOXA |
| blaOXA-134_1_FJ195387 | blaOXA |
| blaOXA-134_2_HQ122933 | blaOXA |
| blaOXA-136_1_EU086833 | blaOXA |
| blaOXA-136_2_EU086832 | blaOXA |
| blaOXA-137_1_EU086836 | blaOXA |
| blaOXA-138_1_EU670845 | blaOXA |
| blaOXA-139_1_AM991978 | blaOXA |
| blaOXA-13_1_AF043558  | blaOXA |
| blaOXA-13_1_U59183    | blaOXA |
| blaOXA-141_1_EF552405 | blaOXA |
| blaOXA-142_1_EU358785 | blaOXA |
| blaOXA-143_1_GQ861437 | blaOXA |
| blaOXA-144_1_FJ617207 | blaOXA |
| blaOXA-144_2_FJ872530 | blaOXA |
| blaOXA-145_1_FJ790516 | blaOXA |
| blaOXA-146_1_FJ194460 | blaOXA |
| blaOXA-147_1_FJ848783 | blaOXA |
| blaOXA-148_1_GQ853679 | blaOXA |
| blaOXA-149_1_GQ853680 | blaOXA |
| blaOXA-14_1_L38523    | blaOXA |
| blaOXA-150_1_GQ853681 | blaOXA |
| blaOXA-15_1_U63835    | blaOXA |
| blaOXA-160_1_GU199038 | blaOXA |
| blaOXA-161_1_GQ202693 | blaOXA |
| blaOXA-162_1_GU197550 | blaOXA |
| blaOXA-163_1_HQ700343 | blaOXA |

|                       |        |
|-----------------------|--------|
| blaOXA-164_1_GU831575 | blaOXA |
| blaOXA-165_1_HM488986 | blaOXA |
| blaOXA-166_1_HM488987 | blaOXA |
| blaOXA-167_1_HM488988 | blaOXA |
| blaOXA-168_1_HM488989 | blaOXA |
| blaOXA-169_1_HM488990 | blaOXA |
| blaOXA-16_1_AF043100  | blaOXA |
| blaOXA-170_1_HM488991 | blaOXA |
| blaOXA-171_1_HM488992 | blaOXA |
| blaOXA-172_1_HM113558 | blaOXA |
| blaOXA-173_1_HM113559 | blaOXA |
| blaOXA-174_1_HM113560 | blaOXA |
| blaOXA-175_1_HM113561 | blaOXA |
| blaOXA-176_1_HM113562 | blaOXA |
| blaOXA-177_1_HM113563 | blaOXA |
| blaOXA-178_1_HM113564 | blaOXA |
| blaOXA-179_1_HM570035 | blaOXA |
| blaOXA-17_1_AF060206  | blaOXA |
| blaOXA-17_2_DQ902344  | blaOXA |
| blaOXA-180_1_HM570036 | blaOXA |
| blaOXA-181_1_HM992946 | blaOXA |
| blaOXA-182_1_HM640278 | blaOXA |
| blaOXA-183_1_HQ111474 | blaOXA |
| blaOXA-18_1_EU503121  | blaOXA |
| blaOXA-192_1_JF273470 | blaOXA |
| blaOXA-194_1_HQ425492 | blaOXA |
| blaOXA-195_1_HQ425493 | blaOXA |
| blaOXA-196_1_HQ425494 | blaOXA |
| blaOXA-197_1_HQ425495 | blaOXA |
| blaOXA-198_1_HQ634775 | blaOXA |
| blaOXA-199_1_HQ637466 | blaOXA |
| blaOXA-19_1_AF043381  | blaOXA |
| blaOXA-1_1_J02967     | blaOXA |
| blaOXA-200_1_HQ734811 | blaOXA |
| blaOXA-201_1_HQ734812 | blaOXA |
| blaOXA-202_1_HQ734813 | blaOXA |
| blaOXA-203_1_HQ998857 | blaOXA |
| blaOXA-204_1_JQ809466 | blaOXA |
| blaOXA-205_1_JF800667 | blaOXA |
| blaOXA-206_1_AB634250 | blaOXA |
| blaOXA-207_1_JQ838185 | blaOXA |
| blaOXA-208_1_FR853176 | blaOXA |
| blaOXA-209_1_JF268688 | blaOXA |
| blaOXA-20_1_AF024602  | blaOXA |

|                       |        |
|-----------------------|--------|
| blaOXA-210_1_JF795487 | blaOXA |
| blaOXA-211_1_JN861779 | blaOXA |
| blaOXA-212_1_JN861780 | blaOXA |
| blaOXA-213_1_JN861781 | blaOXA |
| blaOXA-214_1_JN861782 | blaOXA |
| blaOXA-215_1_JN861783 | blaOXA |
| blaOXA-216_1_FR865168 | blaOXA |
| blaOXA-217_1_JN603240 | blaOXA |
| blaOXA-219_1_JN215211 | blaOXA |
| blaOXA-21_2_DQ993182  | blaOXA |
| blaOXA-223_1_JN248564 | blaOXA |
| blaOXA-224_1_JN596991 | blaOXA |
| blaOXA-225_1_JN638887 | blaOXA |
| blaOXA-228_1_JQ422053 | blaOXA |
| blaOXA-229_1_JQ422052 | blaOXA |
| blaOXA-22_1_AF064820  | blaOXA |
| blaOXA-230_1_JQ422054 | blaOXA |
| blaOXA-231_1_JQ326200 | blaOXA |
| blaOXA-232_1_JX423831 | blaOXA |
| blaOXA-235_1_JQ820240 | blaOXA |
| blaOXA-236_1_JQ820242 | blaOXA |
| blaOXA-237_1_JQ820241 | blaOXA |
| blaOXA-239_1_JQ837239 | blaOXA |
| blaOXA-23_1_HQ700358  | blaOXA |
| blaOXA-240_1_JX089628 | blaOXA |
| blaOXA-241_1_JX025021 | blaOXA |
| blaOXA-242_1_JX025022 | blaOXA |
| blaOXA-243_1_JX206446 | blaOXA |
| blaOXA-244_1_JX438000 | blaOXA |
| blaOXA-245_1_JX438001 | blaOXA |
| blaOXA-247_1_JX893517 | blaOXA |
| blaOXA-248_1_HE963769 | blaOXA |
| blaOXA-249_1_HE963770 | blaOXA |
| blaOXA-24_1_AJ239129  | blaOXA |
| blaOXA-250_1_HE963771 | blaOXA |
| blaOXA-251_1_JN118546 | blaOXA |
| blaOXA-253_1_KC479324 | blaOXA |
| blaGES-17_1_HQ874631  | blaGES |
| blaGES-18_1_JQ028729  | blaGES |
| blaGES-19_1_JN596280  | blaGES |
| blaOXA-257_1_KC567681 | blaOXA |
| blaOXA-258_1_HE614014 | blaOXA |
| blaOXA-25_1_AF201826  | blaOXA |
| blaOXA-26_1_AF201827  | blaOXA |

|                       |        |
|-----------------------|--------|
| blaOXA-278_1_KC771279 | blaOXA |
| blaOXA-27_1_AF201828  | blaOXA |
| blaOXA-28_1_FJ374756  | blaOXA |
| blaOXA-29_1_AJ400619  | blaOXA |
| blaOXA-2_1_DQ310703   | blaOXA |
| blaOXA-2_1_GQ466184   | blaOXA |
| blaOXA-2_2_AY444814   | blaOXA |
| blaOXA-309_1_HF947514 | blaOXA |
| blaOXA-31_1_AF294653  | blaOXA |
| blaOXA-320_1_KF151169 | blaOXA |
| blaOXA-322_1_KF203096 | blaOXA |
| blaOXA-323_1_KF203097 | blaOXA |
| blaOXA-324_1_KF203098 | blaOXA |
| blaOXA-325_1_KF203099 | blaOXA |
| blaTEM-121_1_AY307374 | blaTEM |
| blaTEM-122_1_AY307100 | blaTEM |
| blaTEM-123_1_AY327539 | blaTEM |
| blaTEM-124_1_AY327540 | blaTEM |
| blaTEM-125_1_AY628176 | blaTEM |
| blaTEM-126_1_AY628199 | blaTEM |
| blaTEM-127_1_AY368236 | blaTEM |
| blaTEM-128_1_AY359287 | blaTEM |
| blaTEM-129_1_AY452662 | blaTEM |
| blaTEM-12_1_M88143    | blaTEM |
| blaTEM-130_1_AJ866988 | blaTEM |
| blaTEM-131_1_AY436361 | blaTEM |
| blaTEM-132_1_AY491682 | blaTEM |
| blaTEM-133_1_AY528425 | blaTEM |
| blaTEM-134_1_AY574271 | blaTEM |
| blaTEM-135_1_GQ896333 | blaTEM |
| blaTEM-136_1_AY826417 | blaTEM |
| blaTEM-137_1_AM286274 | blaTEM |
| blaTEM-138_1_AY853593 | blaTEM |
| blaTEM-139_1_DQ072853 | blaTEM |
| blaTEM-141_1_AY956335 | blaTEM |
| blaOXA-355_1_KF297584 | blaOXA |
| blaOXA-356_1_KF297585 | blaOXA |
| blaOXA-357_1_KF421160 | blaOXA |
| blaOXA-358_1_KF421161 | blaOXA |
| blaOXA-359_1_KF421162 | blaOXA |
| blaOXA-35_1_AF315786  | blaOXA |
| blaOXA-360_1_KF421163 | blaOXA |
| blaOXA-36_1_AF300985  | blaOXA |
| blaOXA-371_1_AB871653 | blaOXA |

|                       |        |
|-----------------------|--------|
| blaOXA-37_1_AY007784  | blaOXA |
| blaOXA-3_1_L07945     | blaOXA |
| blaOXA-40_1_AF509241  | blaOXA |
| blaOXA-42_1_AJ488302  | blaOXA |
| blaOXA-43_1_AJ488303  | blaOXA |
| blaOXA-45_1_AJ519683  | blaOXA |
| blaOXA-46_1_AJ969237  | blaOXA |
| blaOXA-47_1_AY237830  | blaOXA |
| blaOXA-48_1_HM755942  | blaOXA |
| blaOXA-48_2_AY236073  | blaOXA |
| blaOXA-49_1_AY288523  | blaOXA |
| blaOXA-4_1_AY162283   | blaOXA |
| blaOXA-50_1_AY306135  | blaOXA |
| blaOXA-50_2_AY306133  | blaOXA |
| blaOXA-50_3_AY306130  | blaOXA |
| blaOXA-50_3_AY306132  | blaOXA |
| blaOXA-51_10_EU255289 | blaOXA |
| blaOXA-51_11_EU255288 | blaOXA |
| blaOXA-51_1_AJ309734  | blaOXA |
| blaOXA-51_3_EU255296  | blaOXA |
| blaOXA-51_4_EU255295  | blaOXA |
| blaOXA-51_5_EU255294  | blaOXA |
| blaOXA-51_6_EU255293  | blaOXA |
| blaOXA-51_7_EU255292  | blaOXA |
| blaOXA-51_8_EU255291  | blaOXA |
| blaOXA-51_9_EU255290  | blaOXA |
| blaOXA-53_1_AY289608  | blaOXA |
| blaOXA-54_1_AY500137  | blaOXA |
| blaOXA-55_1_AY343493  | blaOXA |
| blaOXA-56_1_AY660529  | blaOXA |
| blaOXA-56_1_EF437948  | blaOXA |
| blaOXA-57_1_AJ631966  | blaOXA |
| blaOXA-58_14_EU107364 | blaOXA |
| blaOXA-58_1_AY665723  | blaOXA |
| blaOXA-59_1_AJ632249  | blaOXA |
| blaOXA-5_1_X58272     | blaOXA |
| blaOXA-60_1_AY664506  | blaOXA |
| blaOXA-60_2_AY664505  | blaOXA |
| blaOXA-60_3_AY664504  | blaOXA |
| blaOXA-60_4_AY662675  | blaOXA |
| blaOXA-61_1_AY587956  | blaOXA |
| blaOXA-62_1_AY423074  | blaOXA |
| blaOXA-63_1_AY619003  | blaOXA |
| blaOXA-64_1_AY750907  | blaOXA |

|                       |            |
|-----------------------|------------|
| blaOXA-65_1_AY750908  | blaOXA     |
| blaOXA-66_4_FJ360530  | blaOXA     |
| blaOXA-67_1_DQ491200  | blaOXA     |
| blaOXA-68_1_AY750910  | blaOXA     |
| blaOXA-69_1_HM564339  | blaOXA     |
| blaOXA-70_1_AY750912  | blaOXA     |
| blaOXA-71_1_AY859528  | blaOXA     |
| blaOXA-72_1_GU199039  | blaOXA     |
| blaOXA-73_1_AY762325  | blaOXA     |
| blaOXA-74_1_EU161636  | blaOXA     |
| blaOXA-75_1_AY859529  | blaOXA     |
| blaOXA-76_1_AY949203  | blaOXA     |
| blaOXA-77_1_AY949202  | blaOXA     |
| blaOXA-78_1_AY862132  | blaOXA     |
| blaOXA-79_1_EU019534  | blaOXA     |
| blaOXA-7_1_X75562     | blaOXA     |
| blaOXA-80_1_EU019535  | blaOXA     |
| blaOXA-82_1_GQ352402  | blaOXA     |
| blaOXA-82_2_EU019536  | blaOXA     |
| blaOXA-83_1_DQ309277  | blaOXA     |
| blaOXA-84_1_DQ309276  | blaOXA     |
| blaOXA-85_1_AY227054  | blaOXA     |
| blaOXA-86_1_DQ149247  | blaOXA     |
| blaOXA-87_1_DQ348075  | blaOXA     |
| blaOXA-88_1_DQ392963  | blaOXA     |
| blaOXA-89_1_EU547444  | blaOXA     |
| blaOXA-89_2_DQ445683  | blaOXA     |
| blaOXA-90_1_EU547443  | blaOXA     |
| blaOXA-91_1_DQ519086  | blaOXA     |
| blaOXA-92_1_DQ335566  | blaOXA     |
| blaOXA-93_1_DQ519087  | blaOXA     |
| blaOXA-94_1_DQ519088  | blaOXA     |
| blaOXA-95_1_DQ519089  | blaOXA     |
| blaOXA-96_1_DQ519090  | blaOXA     |
| blaOXA-97_1_EF102240  | blaOXA     |
| blaOXA-98_1_AM279652  | blaOXA     |
| blaOXA-99_1_DQ888718  | blaOXA     |
| blaOXA-9_2_JF703130   | blaOXA     |
| blaOXA-SHE_1_AY066004 | blaOXA-SHE |
| blaOXY-1-1_1_Z30177   | blaOXY     |
| blaOXY-1-2_2_AJ871864 | blaOXY     |
| blaOXY-1-3_3_AY077482 | blaOXY     |
| blaOXY-1-4_4_AY077483 | blaOXY     |
| blaOXY-1-5_5_AY077486 | blaOXY     |

|                         |         |
|-------------------------|---------|
| blaOXY-1-6_6_Y17715     | blaOXY  |
| blaOXY-1-7_7_M27459     | blaOXY  |
| blaOXY-2-10_10_FJ785626 | blaOXY  |
| blaOXY-2-1_1_AJ871866   | blaOXY  |
| blaOXY-2-2_2_AJ871867   | blaOXY  |
| blaOXY-2-3_3_AY077488   | blaOXY  |
| blaOXY-2-4_4_Y17714     | blaOXY  |
| blaOXY-2-5_5_AY077487   | blaOXY  |
| blaOXY-2-6_6_AY077485   | blaOXY  |
| blaOXY-2-7_7_Z49084     | blaOXY  |
| blaOXY-2-8_8_AY055205   | blaOXY  |
| blaOXY-2-9_9_FJ785625   | blaOXY  |
| blaOXY-3-1_1_AF491278   | blaOXY  |
| blaOXY-4-1_1_AY077481   | blaOXY  |
| blaOXY-5-1_1_AJ871868   | blaOXY  |
| blaOXY-5-2_2_AJ871871   | blaOXY  |
| blaOXY-6-1_1_AJ871873   | blaOXY  |
| blaOXY-6-2_2_AJ871875   | blaOXY  |
| blaOXY-6-3_3_AJ871876   | blaOXY  |
| blaOXY-6-4_4_AJ871877   | blaOXY  |
| blaPAO_1_AY083595       | blaPAO  |
| blaPAO_2_FJ666065       | blaPAO  |
| blaPAO_3_FJ666073       | blaPAO  |
| blaPAO_4_AY083592       | blaPAO  |
| blaPER-1_1_GU944725     | blaPER  |
| blaPER-2_1_X93314       | blaPER  |
| blaPER-3_1_AY740681     | blaPER  |
| blaPER-4_1_EU748544     | blaPER  |
| blaPER-5_1_FJ627180     | blaPER  |
| blaPER-6_1_GQ396303     | blaPER  |
| blaPER-7_1_HQ713678     | blaPER  |
| blaPME-1_1_HQ541434     | blaPME  |
| blaRAHN-1_1_GU645205    | blaRAHN |
| blaRAHN-1_2_AF338038    | blaRAHN |
| blaRAHN-2_2_HM114350    | blaRAHN |
| blaROB-1_1_DQ840517     | blaROB  |
| blaROB-1_2_AF022114     | blaROB  |
| blaSED1_1_AF321608      | blaSED  |
| blaSFC-1_1_AY354402     | blaSFC  |
| blaSFO-1_1_AB003148     | blaSFO  |
| blaSHV-100_1_AM941846   | blaSHV  |
| blaSHV-101_1_EU155018   | blaSHV  |
| blaSHV-102_2_EU024485   | blaSHV  |
| blaSHV-103_1_EU032604   | blaSHV  |

|                       |        |
|-----------------------|--------|
| blaSHV-104_1_EU274581 | blaSHV |
| blaSHV-105_1_FJ194944 | blaSHV |
| blaSHV-106_1_AM922307 | blaSHV |
| blaSHV-107_1_AM922308 | blaSHV |
| blaSHV-108_1_AM922309 | blaSHV |
| blaSHV-109_1_EU418913 | blaSHV |
| blaSHV-110_1_HQ877615 | blaSHV |
| blaSHV-11_10_EF035557 | blaSHV |
| blaSHV-11_11_GU064392 | blaSHV |
| blaSHV-11_12_GU211012 | blaSHV |
| blaSHV-11_13_DQ219476 | blaSHV |
| blaSHV-11_14_DQ219474 | blaSHV |
| blaSHV-11_15_DQ219473 | blaSHV |
| blaSHV-11_1_AY528717  | blaSHV |
| blaSHV-11_2_HM751098  | blaSHV |
| blaSHV-11_3_EF035563  | blaSHV |
| blaSHV-11_4_EF035558  | blaSHV |
| blaSHV-11_5_GQ407117  | blaSHV |
| blaSHV-11_6_GQ407130  | blaSHV |
| blaSHV-11_7_GQ407109  | blaSHV |
| blaSHV-11_8_GQ387358  | blaSHV |
| blaSHV-11_9_FJ483937  | blaSHV |
| blaSHV-120_1_JF812965 | blaSHV |
| blaSHV-121_1_GQ428198 | blaSHV |
| blaSHV-122_1_HM751103 | blaSHV |
| blaSHV-128_1_GU932590 | blaSHV |
| blaSHV-129_1_GU827715 | blaSHV |
| blaSHV-129_2_HM125687 | blaSHV |
| blaSHV-12_1_AF462395  | blaSHV |
| blaSHV-12_2_AY273807  | blaSHV |
| blaSHV-12_3_FJ668805  | blaSHV |
| blaSHV-132_1_GU981741 | blaSHV |
| blaSHV-133_1_AB551737 | blaSHV |
| blaSHV-134_1_HM559945 | blaSHV |
| blaSHV-135_1_HQ637576 | blaSHV |
| blaSHV-136_1_HQ661362 | blaSHV |
| blaSHV-137_1_HQ661363 | blaSHV |
| blaSHV-13_1_AF164577  | blaSHV |
| blaSHV-140_1_JN051143 | blaSHV |
| blaSHV-141_1_JQ388884 | blaSHV |
| blaSHV-142_1_JQ029959 | blaSHV |
| blaSHV-143_1_JQ341060 | blaSHV |
| blaSHV-144_1_JQ926986 | blaSHV |
| blaSHV-145_1_JX013655 | blaSHV |

|                       |        |
|-----------------------|--------|
| blaSHV-147_1_JX121114 | blaSHV |
| blaSHV-148_1_JX121115 | blaSHV |
| blaSHV-149_1_JX121116 | blaSHV |
| blaSHV-14_1_AF226622  | blaSHV |
| blaSHV-150_1_JX121117 | blaSHV |
| blaSHV-151_1_JX121118 | blaSHV |
| blaSHV-152_1_JX121119 | blaSHV |
| blaSHV-153_1_JX121120 | blaSHV |
| blaSHV-154_1_JX121121 | blaSHV |
| blaSHV-155_1_JX121122 | blaSHV |
| blaSHV-156_1_JX121123 | blaSHV |
| blaSHV-157_1_JX121124 | blaSHV |
| blaSHV-158_1_JX121125 | blaSHV |
| blaSHV-159_1_JX121126 | blaSHV |
| blaSHV-15_1_AJ011428  | blaSHV |
| blaSHV-160_1_JX121127 | blaSHV |
| blaSHV-161_1_JX121128 | blaSHV |
| blaSHV-162_1_JX121129 | blaSHV |
| blaSHV-163_1_JX121130 | blaSHV |
| blaSHV-164_1_HE981194 | blaSHV |
| blaSHV-165_1_JX121131 | blaSHV |
| blaSHV-168_1_JX870080 | blaSHV |
| blaSHV-16_1_AF072684  | blaSHV |
| blaSHV-172_1_KF513177 | blaSHV |
| blaSHV-173_1_KF513178 | blaSHV |
| blaSHV-178_1_KF705209 | blaSHV |
| blaSHV-179_1_KF705208 | blaSHV |
| blaSHV-18_1_AF132290  | blaSHV |
| blaSHV-1_10_EF035567  | blaSHV |
| blaSHV-1_11_EF035565  | blaSHV |
| blaSHV-1_12_AY787643  | blaSHV |
| blaSHV-1_13_AF462396  | blaSHV |
| blaSHV-1_14_HM751099  | blaSHV |
| blaSHV-1_15_FJ668804  | blaSHV |
| blaSHV-1_16_FJ668800  | blaSHV |
| blaSHV-1_17_FJ668799  | blaSHV |
| blaSHV-1_18_FJ668818  | blaSHV |
| blaSHV-1_1_DQ166783   | blaSHV |
| blaSHV-1_2_X98100     | blaSHV |
| blaSHV-1_3_X98098     | blaSHV |
| blaSHV-1_4_GQ407127   | blaSHV |
| blaSHV-1_5_GQ407119   | blaSHV |
| blaSHV-1_6_GU083599   | blaSHV |
| blaSHV-1_7_GU083598   | blaSHV |

|                      |        |
|----------------------|--------|
| blaSHV-1_8_GQ407137  | blaSHV |
| blaSHV-1_9_HM751102  | blaSHV |
| blaSHV-24_1_AB023477 | blaSHV |
| blaSHV-25_1_GU064391 | blaSHV |
| blaSHV-26_1_AF227204 | blaSHV |
| blaSHV-27_1_AF293345 | blaSHV |
| blaSHV-28_1_HM751101 | blaSHV |
| blaSHV-28_2_EU441172 | blaSHV |
| blaSHV-28_3_AF299299 | blaSHV |
| blaSHV-29_1_AF301532 | blaSHV |
| blaSHV-2_1_GQ407116  | blaSHV |
| blaSHV-2_2_AF282921  | blaSHV |
| blaSHV-2_4_GU064394  | blaSHV |
| blaSHV-2a_13_X98102  | blaSHV |
| blaSHV-30_1_AY661885 | blaSHV |
| blaSHV-31_1_GU064396 | blaSHV |
| blaSHV-31_2_AY277255 | blaSHV |
| blaSHV-33_1_AY037779 | blaSHV |
| blaSHV-34_1_AY036620 | blaSHV |
| blaSHV-35_1_AY070258 | blaSHV |
| blaSHV-36_1_AY677211 | blaSHV |
| blaSHV-36_2_AF467947 | blaSHV |
| blaSHV-37_1_AF467948 | blaSHV |
| blaSHV-38_1_EU979559 | blaSHV |
| blaSHV-40_1_AF535128 | blaSHV |
| blaSHV-41_1_AF535129 | blaSHV |
| blaSHV-42_1_EF035559 | blaSHV |
| blaSHV-43_1_AY065991 | blaSHV |
| blaSHV-44_1_AY259119 | blaSHV |
| blaSHV-45_1_AF547625 | blaSHV |
| blaSHV-46_1_AY210887 | blaSHV |
| blaSHV-48_1_AY263404 | blaSHV |
| blaSHV-49_1_AY528718 | blaSHV |
| blaSHV-50_1_AY288915 | blaSHV |
| blaSHV-51_1_AY289548 | blaSHV |
| blaSHV-52_1_HQ845196 | blaSHV |
| blaSHV-55_1_DQ054528 | blaSHV |
| blaSHV-56_1_EU586041 | blaSHV |
| blaSHV-56_2_AY352599 | blaSHV |
| blaSHV-57_1_AY223863 | blaSHV |
| blaSHV-59_1_AY790341 | blaSHV |
| blaSHV-5_1_AF096930  | blaSHV |
| blaSHV-5_2_AF462394  | blaSHV |
| blaSHV-5_3_GQ407139  | blaSHV |

|                      |        |
|----------------------|--------|
| blaSHV-5_4_AY386369  | blaSHV |
| blaSHV-5_5_S82452    | blaSHV |
| blaSHV-5_6_EF653399  | blaSHV |
| blaSHV-5_7_AY570962  | blaSHV |
| blaSHV-5_8_AY502004  | blaSHV |
| blaSHV-5_9_AY502000  | blaSHV |
| blaSHV-60_1_AB302939 | blaSHV |
| blaSHV-61_1_AJ866284 | blaSHV |
| blaSHV-62_1_AJ866285 | blaSHV |
| blaSHV-62_2_GU064395 | blaSHV |
| blaSHV-63_1_EU342351 | blaSHV |
| blaSHV-64_1_DQ174304 | blaSHV |
| blaSHV-65_1_DQ174305 | blaSHV |
| blaSHV-66_1_DQ174306 | blaSHV |
| blaSHV-67_1_DQ174307 | blaSHV |
| blaSHV-69_1_DQ174308 | blaSHV |
| blaSHV-70_1_DQ013287 | blaSHV |
| blaSHV-71_1_EF373974 | blaSHV |
| blaSHV-71_2_DQ296194 | blaSHV |
| blaSHV-72_1_AM176547 | blaSHV |
| blaSHV-73_1_AM176548 | blaSHV |
| blaSHV-74_1_AM176549 | blaSHV |
| blaSHV-75_1_AM176550 | blaSHV |
| blaSHV-76_1_AM176551 | blaSHV |
| blaSHV-77_1_EF373975 | blaSHV |
| blaSHV-78_1_AM176553 | blaSHV |
| blaSHV-79_1_AM176554 | blaSHV |
| blaSHV-7_1_U20270    | blaSHV |
| blaSHV-80_1_AM176555 | blaSHV |
| blaSHV-81_1_AM176556 | blaSHV |
| blaSHV-82_1_AM176557 | blaSHV |
| blaSHV-83_1_AM176558 | blaSHV |
| blaSHV-85_1_DQ322460 | blaSHV |
| blaSHV-86_1_DQ328802 | blaSHV |
| blaSHV-89_1_DQ193536 | blaSHV |
| blaSHV-8_1_ECU92041  | blaSHV |
| blaSHV-92_1_DQ836922 | blaSHV |
| blaSHV-93_1_EF373969 | blaSHV |
| blaSHV-94_1_EF373970 | blaSHV |
| blaSHV-95_1_EF373972 | blaSHV |
| blaSHV-96_1_EF373971 | blaSHV |
| blaSHV-97_1_EF373973 | blaSHV |
| blaSHV-98_1_AM941844 | blaSHV |
| blaSHV-99_1_AM941845 | blaSHV |

|                       |        |
|-----------------------|--------|
| blaSHV-9_1_S82452     | blaSHV |
| blaSIM-1_1_JF731030   | blaSIM |
| blaSMB-1_1_AB636283   | blaSMB |
| blaSME-1_1_Z28968     | blaSME |
| blaSME-2_1_AF275256   | blaSME |
| blaOXA-254_1_AB781687 | blaOXA |
| blaOXA-255_1_KC479325 | blaOXA |
| blaOXA-256_1_HE616889 | blaOXA |
| blaTEM-102_1_AY040093 | blaTEM |
| blaTEM-104_1_AF516719 | blaTEM |
| blaTEM-105_1_AF516720 | blaTEM |
| blaTEM-106_1_AY101578 | blaTEM |
| blaTEM-107_1_AY101764 | blaTEM |
| blaTEM-108_1_AF506748 | blaTEM |
| blaTEM-109_1_AY628175 | blaTEM |
| blaTEM-10_1_AF093512  | blaTEM |
| blaTEM-110_1_AY072920 | blaTEM |
| blaTEM-111_1_AF468003 | blaTEM |
| blaTEM-112_1_AY589493 | blaTEM |
| blaTEM-113_1_AY589494 | blaTEM |
| blaTEM-114_1_AY589495 | blaTEM |
| blaTEM-115_1_AF535127 | blaTEM |
| blaTEM-116_4_GU188444 | blaTEM |
| blaTEM-116_7_AY425988 | blaTEM |
| blaTEM-11_1_AY874537  | blaTEM |
| blaTEM-120_1_AY243512 | blaTEM |
| blaTEM-85_1_AJ277414  | blaTEM |
| blaTEM-86_1_AJ277415  | blaTEM |
| blaTEM-87_1_AF250872  | blaTEM |
| blaTEM-88_1_AY027590  | blaTEM |
| blaTEM-8_1_X65252     | blaTEM |
| blaTEM-90_1_AF351241  | blaTEM |
| blaTEM-91_1_AB049569  | blaTEM |
| blaTEM-92_1_AF143804  | blaTEM |
| blaTEM-93_1_AJ318093  | blaTEM |
| blaTEM-94_1_AJ318094  | blaTEM |
| blaTEM-95_1_AJ308558  | blaTEM |
| blaTEM-96_1_AY092401  | blaTEM |
| blaTEM-97_1_AF397067  | blaTEM |
| blaTEM-98_1_AF397068  | blaTEM |
| blaTEM-99_1_AF397066  | blaTEM |
| blaTLA-1_1_AF148067   | blaTLA |
| blaTRU_1_EU046614     | blaTRU |
| blaTUS-1_1_AF441287   | blaTUS |

|                       |        |
|-----------------------|--------|
| blaVEB-1_1_HM370393   | blaVEB |
| blaVEB-1_3_DQ393569   | blaVEB |
| blaVEB-1_4_AF324834   | blaVEB |
| blaTEM-142_1_DQ388882 | blaTEM |
| blaTEM-143_1_DQ075245 | blaTEM |
| blaTEM-144_1_DQ256080 | blaTEM |
| blaTEM-145_1_DQ105528 | blaTEM |
| blaTEM-146_1_DQ105529 | blaTEM |
| blaTEM-147_1_DQ279850 | blaTEM |
| blaTEM-148_1_AM087454 | blaTEM |
| blaTEM-149_1_DQ369751 | blaTEM |
| blaTEM-150_1_AM183304 | blaTEM |
| blaTEM-151_1_DQ834729 | blaTEM |
| blaTEM-152_1_DQ834728 | blaTEM |
| blaTEM-153_1_KC149518 | blaTEM |
| blaTEM-154_1_FJ807656 | blaTEM |
| blaTEM-155_1_DQ679961 | blaTEM |
| blaTEM-156_1_AM941159 | blaTEM |
| blaTEM-157_1_DQ909059 | blaTEM |
| blaTEM-158_1_EF534736 | blaTEM |
| blaTEM-159_1_EF136376 | blaTEM |
| blaTEM-15_1_AM849805  | blaTEM |
| blaTEM-160_1_EF136377 | blaTEM |
| blaTEM-162_1_EF468463 | blaTEM |
| blaTEM-163_1_EU815939 | blaTEM |
| blaTEM-164_1_EU274580 | blaTEM |
| blaTEM-166_1_FJ197316 | blaTEM |
| blaTEM-167_1_FJ360884 | blaTEM |
| blaTEM-168_1_FJ919776 | blaTEM |
| blaTEM-169_1_FJ873740 | blaTEM |
| blaTEM-16_1_X65254    | blaTEM |
| blaTEM-171_1_GQ149347 | blaTEM |
| blaTEM-176_1_GU550123 | blaTEM |
| blaTEM-177_1_FN652295 | blaTEM |
| blaTEM-178_1_X97254   | blaTEM |
| blaTEM-17_1_Y14574    | blaTEM |
| blaTEM-182_1_HQ317449 | blaTEM |
| blaTEM-183_1_HQ529916 | blaTEM |
| blaTEM-184_1_FR848831 | blaTEM |
| blaTEM-185_1_JF795538 | blaTEM |
| blaTEM-186_1_JN227084 | blaTEM |
| blaTEM-187_1_HM246246 | blaTEM |
| blaTEM-188_1_JN211012 | blaTEM |
| blaTEM-189_1_JN254627 | blaTEM |

|                       |        |
|-----------------------|--------|
| blaTEM-190_1_JN416112 | blaTEM |
| blaTEM-193_1_JN935135 | blaTEM |
| blaTEM-194_1_JN935136 | blaTEM |
| blaTEM-195_1_JN935137 | blaTEM |
| blaTEM-197_1_HQ877606 | blaTEM |
| blaTEM-198_1_AB700703 | blaTEM |
| blaTEM-199_1_JX050178 | blaTEM |
| blaTEM-1A_4_HM749966  | blaTEM |
| blaTEM-1B_1_JF910132  | blaTEM |
| blaTEM-1C_5_FJ560503  | blaTEM |
| blaTEM-1D_83_AF188200 | blaTEM |
| blaTEM-201_1_JX310327 | blaTEM |
| blaTEM-205_1_KC900516 | blaTEM |
| blaTEM-206_1_KC783461 | blaTEM |
| blaTEM-207_1_KC818234 | blaTEM |
| blaTEM-208_1_KC865667 | blaTEM |
| blaTEM-209_1_KF240808 | blaTEM |
| blaTEM-20_1_EU527189  | blaTEM |
| blaTEM-211_1_KF513179 | blaTEM |
| blaTEM-213_1_KF663615 | blaTEM |
| blaTEM-21_1_Y17582    | blaTEM |
| blaTEM-22_1_Y17583    | blaTEM |
| blaTEM-24_1_GQ293500  | blaTEM |
| blaTEM-28_1_ECU37195  | blaTEM |
| blaTEM-29_1_DQ269440  | blaTEM |
| blaTEM-2_1_X54606     | blaTEM |
| blaTEM-2_3_AJ251946   | blaTEM |
| blaTEM-30_1_AJ437107  | blaTEM |
| blaTEM-33_1_GU371926  | blaTEM |
| blaTEM-34_1_KC292503  | blaTEM |
| blaTEM-3_1_X64523     | blaTEM |
| blaTEM-43_1_KPU95363  | blaTEM |
| blaTEM-45_1_X95401    | blaTEM |
| blaTEM-47_1_Y10279    | blaTEM |
| blaTEM-48_1_Y10280    | blaTEM |
| blaTEM-49_1_Y10281    | blaTEM |
| blaTEM-52B_1_AF027199 | blaTEM |
| blaTEM-52C_2_EF141186 | blaTEM |
| blaTEM-53_1_AF104441  | blaTEM |
| blaTEM-54_1_AF104442  | blaTEM |
| blaTEM-55_1_DQ286729  | blaTEM |
| blaTEM-57_1_FJ405211  | blaTEM |
| blaTEM-60_1_AF047171  | blaTEM |
| blaTEM-63_1_AF332513  | blaTEM |

|                      |        |
|----------------------|--------|
| blaTEM-67_1_AF091113 | blaTEM |
| blaTEM-68_1_AJ239002 | blaTEM |
| blaTEM-6_1_X57972    | blaTEM |
| blaTEM-70_1_AF188199 | blaTEM |
| blaTEM-71_1_AF203816 | blaTEM |
| blaTEM-72_1_AF157553 | blaTEM |
| blaTEM-76_1_AF190694 | blaTEM |
| blaTEM-77_1_AF190695 | blaTEM |
| blaTEM-78_1_AF190693 | blaTEM |
| blaTEM-79_1_AF190692 | blaTEM |
| blaTEM-80_1_AF347054 | blaTEM |
| blaTEM-81_1_AF427127 | blaTEM |
| blaTEM-82_1_AF427128 | blaTEM |
| blaTEM-83_1_AF427129 | blaTEM |
| blaTEM-84_1_AF427130 | blaTEM |
| blaVIM-23_1_GQ242167 | blaVIM |
| blaVIM-24_1_HM855205 | blaVIM |
| blaVIM-25_1_HM750249 | blaVIM |
| blaVIM-26_1_FR748153 | blaVIM |
| cphA1_1_AY261379     | cphA   |
| cphA1_2_AY261377     | cphA   |
| cphA1_3_AY261378     | cphA   |
| cphA1_4_AY261376     | cphA   |
| cphA1_7_X57102       | cphA   |
| cphA2_6_AHU60294     | cphA   |
| cphA4_1_AY227050     | cphA   |
| cphA5_1_AY227051     | cphA   |
| cphA6_1_AY227052     | cphA   |
| cphA7_1_AY227053     | cphA   |
| cphA8_1_AY261375     | cphA   |
| blaVIM-37_1_JX982636 | blaVIM |
| blaVIM-38_1_KC469971 | blaVIM |
| blaVIM-3_1_AF300454  | blaVIM |
| blaVIM-4_1_EU581706  | blaVIM |
| blaVIM-5_1_DQ023222  | blaVIM |
| blaVIM-6_1_AY165025  | blaVIM |
| blaVEB-2_1_AY027870  | blaVEB |
| blaVEB-3_1_AY536519  | blaVEB |
| blaVEB-4_1_EF136375  | blaVEB |
| blaVEB-5_1_EF420108  | blaVEB |
| blaVEB-6_1_EU259884  | blaVEB |
| blaVEB-7_1_FJ825622  | blaVEB |
| blaVEB-8_1_JX679208  | blaVEB |
| blaVIM-10_1_AY524989 | blaVIM |

|                      |        |
|----------------------|--------|
| blaVIM-11_1_AY605049 | blaVIM |
| blaVIM-12_1_DQ143913 | blaVIM |
| blaVIM-13_1_DQ365886 | blaVIM |
| blaVIM-14_1_FJ445404 | blaVIM |
| blaVIM-15_1_EU419745 | blaVIM |
| blaVIM-16_1_EU419746 | blaVIM |
| blaVIM-17_1_EU118148 | blaVIM |
| blaVIM-18_1_AM778091 | blaVIM |
| blaVIM-19_1_FJ499397 | blaVIM |
| blaVIM-1_1_Y18050    | blaVIM |
| blaVIM-20_1_GQ414736 | blaVIM |
| mecA_5_CP000046      | mecA   |
| mecA_6_FR821779      | mecA   |
| mecA_7_BA000018      | mecA   |
| cepA_1_L13472        | cepA   |
| blaVIM-27_1_HQ858608 | blaVIM |
| blaVIM-28_1_JF900599 | blaVIM |
| blaVIM-29_1_JX311308 | blaVIM |
| blaVIM-2_1_AF302086  | blaVIM |
| blaVIM-30_1_JN129451 | blaVIM |
| blaVIM-31_1_JN982330 | blaVIM |
| blaVIM-32_1_JN676230 | blaVIM |
| blaVIM-33_1_JX258134 | blaVIM |
| blaVIM-34_1_JX013656 | blaVIM |
| blaVIM-35_1_JX982634 | blaVIM |
| blaVIM-36_1_JX982635 | blaVIM |
| cepA-49_1_U05886     | cepA   |
| blaZ_40_DQ269019     | blaZ   |
| cepA_1_U05887        | cepA   |
| cepA_6_FR688022      | cepA   |
| cfiA10_1_AB087227    | cfiA   |
| cfiA13_1_FM200787    | cfiA   |
| blaVIM-7_1_AJ536835  | blaVIM |
| blaVIM-8_1_AY524987  | blaVIM |
| blaVIM-9_1_AY524988  | blaVIM |
| blaZEG-1_1_AY265891  | blaZEG |
| blaZ_32_AP004832     | blaZ   |
| blaZ_34_AP003139     | blaZ   |
| blaZ_35_AJ302698     | blaZ   |
| blaZ_36_AJ400722     | blaZ   |
| cfiA8_1_AB087233     | cfiA   |
| cfiA9_1_AB087234     | cfiA   |
| mecA_10_AB512767     | mecA   |
| cfxA2_1_AF504914     | cfxA   |

|                         |          |
|-------------------------|----------|
| cfxA3_1_AF472622        | cfxA     |
| cfxA4_1_AY769933        | cfxA     |
| mecA_4_AB033763         | mecA     |
| mecA_14_AB505630        | mecA     |
| mecA_15_AB505628        | mecA     |
| mecA_2_FR823292         | mecA     |
| penA_1_AF515059         | penA     |
| cepA-29_1_U05884        | cepA     |
| cepA-44_1_U05885        | cepA     |
| hugA_1_AF324468         | hugA     |
| cfiA2_1_AB087226        | cfiA     |
| cfiA14_1_FM200789       | cfiA     |
| cfiA16_1_FM200792       | cfiA     |
| cfiA1_1_AB087225        | cfiA     |
| cfxA6_1_GQ342996        | cfxA     |
| cfiA3_1_AB087228        | cfiA     |
| cfiA4_1_AB087229        | cfiA     |
| cfiA6_1_AB087231        | cfiA     |
| imiS_1_Y10415           | imiS     |
| imiH_1_AJ548797         | imiH     |
| cfxA_2_AY769933         | cfxA     |
| cfxA5_1_AY769934        | cfxA     |
| cfxA_1_U38243           | cfxA     |
| blaSPM-1_1_AY341249     | blaSPM   |
| blaTEM-101_1_AF495873   | blaTEM   |
| blaSME-3_1_AY584237     | blaSME   |
| aac(6')Ib-cr_3_EF210035 | aac(6')I |
| aac(6')Ib-cr_2_EF636461 | aac(6')I |
| aac(_1_DQ303918         | aac(6')I |
| norA_1_M97169           | norA     |
| oqx_B_1_EU370913        | oqx_B    |
| oqx_A_1_EU370913        | oqx_A    |
| fosA_13_EU487198        | fosA     |
| fosA_12_AY692231        | fosA     |
| fosB_1_X54227           | fosB     |
| fosB_2_X89875           | fosB     |
| fosA_15_CP002889        | fosA     |
| fosA_16_M85195          | fosA     |
| fosA_3_NZ_ACWO01000079  | fosA     |
| fosA_11_DQ396803        | fosA     |
| fosA_8_ACHE01000077     | fosA     |
| fosA_9_NZ_ACZD01000244  | fosA     |
| fosC_2_Z33413           | fosC     |
| fosA_14_AB522970        | fosA     |

|                        |         |
|------------------------|---------|
| fosB_3_HQ219726        | fosB    |
| fosC_1_AB522969        | fosC    |
| fosA_6_NZ_DS999363     | fosA    |
| fosA_2_AGDM01000012    | fosA    |
| fosA_4_NZ_AFW01000027  | fosA    |
| fosA_5_NZ_AEXB01000013 | fosA    |
| fosA_10_EU195449       | fosA    |
| fosA_7_NZ_AFBO01000747 | fosA    |
| fusB_3_JF777505        | fusB    |
| fusB_1_AM292600        | fusB    |
| far1_1_DQ269019        | far1    |
| fusB_2_JF808725        | fusB    |
| lnu(B)_1_AJ238249      | lnu(B)  |
| lnu(C)_1_AY928180      | lnu(C)  |
| lmr(B)_1_X62867        | lmr(B)  |
| lnu(A)_1_M14039        | lnu(A)  |
| lnu(F)_3_AJ561197      | lnu(F)  |
| lmr(A)_1_X59926        | lmr(A)  |
| lnu(F)_1_EU118119      | lnu(F)  |
| lnu(F)_2_DQ836009      | lnu(F)  |
| lnu(D)_1_EF452177      | lnu(D)  |
| erm(33)_2_AJ579365     | erm(33) |
| erm(41)_1_EU177504     | erm(41) |
| erm(34)_1_AY234334     | erm(34) |
| erm(32)_1_AJ009971     | erm(32) |
| erm(42)_1_FR734406     | erm(42) |
| erm(35)_1_AF319779     | erm(35) |
| erm(C)_2_M19652        | erm(C)  |
| erm(E)_2_M11200        | erm(E)  |
| erm(D)_2_L08389        | erm(D)  |
| erm(42)_2_AB601890     | erm(42) |
| erm(C)_1_V01278        | erm(C)  |
| erm(40)_1_AY570506     | erm(40) |
| erm(B)_1_JN899585      | erm(B)  |
| erm(D)_3_M77505        | erm(D)  |
| erm(E)_1_X51891        | erm(E)  |
| erm(B)_2_K00551        | erm(B)  |
| erm(D)_1_M29832        | erm(D)  |
| erm(B)_20_AF109075     | erm(B)  |
| erm(B)_21_U35228       | erm(B)  |
| erm(C)_10_Y09002       | erm(C)  |
| erm(C)_12_Y09003       | erm(C)  |
| erm(B)_7_AF368302      | erm(B)  |
| erm(B)_9_AF299292      | erm(B)  |

|                    |         |
|--------------------|---------|
| erm(C)_16_AF019140 | erm(C)  |
| ere(A)_1_AY138453  | ere(A)  |
| ere(A)_2_AF099140  | ere(A)  |
| ere(A)_3_AF326209  | ere(A)  |
| ere(A)_4_AF512546  | ere(A)  |
| ere(B)_1_A15097    | ere(B)  |
| erm(B)_6_AF242872  | erm(B)  |
| erm(30)_1_AF079138 | erm(30) |
| erm(31)_1_AF079138 | erm(31) |
| mef(A)_10_AF376746 | mef(A)  |
| mef(A)_3_AF227521  | mef(A)  |
| erm(36)_1_AF462611 | erm(36) |
| erm(38)_1_AY154657 | erm(38) |
| erm(39)_1_AY487229 | erm(39) |
| mph(B)_1_D85892    | mph(B)  |
| mph(C)_1_AB013298  | mph(C)  |
| mph(C)_2_AF167161  | mph(C)  |
| mph(D)_1_AB048591  | mph(D)  |
| mph(E)_3_EU294228  | mph(E)  |
| mph(E)_5_DQ839391  | mph(E)  |
| erm(A)_1_X03216    | erm(A)  |
| erm(A)_2_AF002716  | erm(A)  |
| erm(A)_3_EU348758  | erm(A)  |
| erm(B)_10_U86375   | erm(B)  |
| mef(B)_1_FJ196385  | mef(B)  |
| mph(A)_1_D16251    | mph(A)  |
| mph(A)_2_U36578    | mph(A)  |
| erm(B)_16_X82819   | erm(B)  |
| erm(B)_17_X64695   | erm(B)  |
| erm(B)_18_X66468   | erm(B)  |
| erm(W)_1_D14532    | erm(W)  |
| erm(X)_1_M36726    | erm(X)  |
| erm(X)_2_X51472    | erm(X)  |
| erm(X)_3_U21300    | erm(X)  |
| erm(X)_4_NC_005206 | erm(X)  |
| erm(Y)_1_AB014481  | erm(Y)  |
| lsa(A)_1_AY225127  | lsa(A)  |
| lsa(A)_2_AY58982   | lsa(A)  |
| erm(C)_13_M13761   | erm(C)  |
| erm(C)_14_M12730   | erm(C)  |
| erm(C)_15_U82607   | erm(C)  |
| erm(F)_3_M17808    | erm(F)  |
| erm(F)_4_M62487    | erm(F)  |
| erm(G)_1_M15332    | erm(G)  |

|                        |        |
|------------------------|--------|
| erm(G)_2_L42817        | erm(G) |
| erm(C)_3_M17990        | erm(C) |
| erm(C)_6_X82668        | erm(C) |
| erm(C)_9_Y09001        | erm(C) |
| ere(B)_2_X03988        | ere(B) |
| erm(Q)_1_L22689        | erm(Q) |
| erm(R)_2_AY623658      | erm(R) |
| erm(B)_11_M19270       | erm(B) |
| erm(B)_12_U18931       | erm(B) |
| erm(F)_2_M17124        | erm(F) |
| erm(T)_3_AF310974      | erm(T) |
| erm(T)_4_AJ488494      | erm(T) |
| erm(V)_1_U59450        | erm(V) |
| erm(O)_2_AJ223970      | erm(O) |
| erm(H)_1_M16503        | erm(H) |
| erm(N)_1_X97721        | erm(N) |
| erm(O)_1_M74717        | erm(O) |
| lsa(A)_3_AY737526      | lsa(A) |
| erm(B)_15_U48430       | erm(B) |
| erm(Z)_1_AM709783      | erm(Z) |
| erm(T)_2_AY894138      | erm(T) |
| erm(S)_1_M19269        | erm(S) |
| lsa(C)_1_HM990671      | lsa(C) |
| erm(T)_1_M64090        | erm(T) |
| lsa(B)_1_AJ579365      | lsa(B) |
| car(A)_1_M80346        | car(A) |
| msr(A)_1_X52085        | msr(A) |
| ole(B)_1_L36601        | ole(B) |
| msr(C)_1_AY004350      | msr(C) |
| tlr(C)_1_M57437        | tlr(C) |
| msr(E)_5_DQ839391      | msr(E) |
| srm(B)_1_X63451        | srm(B) |
| msr(A)_2_AB013298      | msr(A) |
| msr(A)_3_M81802        | msr(A) |
| msr(D)_3_AF227520      | msr(D) |
| msr(E)_7_AF550415      | msr(E) |
| msr(D)_2_AF274302      | msr(D) |
| msr(E)_4_EU294228      | msr(E) |
| msr(C)_2_AF313494      | msr(C) |
| ole(C)_1_L06249        | ole(C) |
| catB9_1_AF462019       | catB   |
| cat(pC194)_1_NC_002013 | cat    |
| catS_1_X74948          | catS   |
| cmrA_1_Z12001          | cmrA   |

|                       |      |
|-----------------------|------|
| catB10_1_AJ878850     | catB |
| catP_1_U15027         | catP |
| catB8_1_AF227506      | catB |
| cat(pC233)_1_AY355285 | cat  |
| cmx_1_U85507          | cmx  |
| cat_2_M35190          | cat  |
| catQ_1_M55620         | catQ |
| catA2_1_X53796        | catA |
| catA3_1_X07848        | catA |
| cat_5_U35036          | cat  |
| catB1_1_M58472        | catB |
| cml_1_M22614          | cml  |
| catB3_1_AJ009818      | catB |
| catB7_1_AF036933      | catB |
| catB2_1_AF047479      | catB |
| cat(pC221)_1_X02529   | cat  |
| cat_3_S48276          | cat  |
| cat86_1_K00544        | cat  |
| floR_3_AJ251806       | floR |
| catA1_1_V00622        | catA |
| cmlA1_1_M64556        | cmlA |
| cat_4_AY238971        | cat  |
| cmlV_1_U09991         | cmlV |
| cat_1_M11587          | cat  |
| pexA_1_HM537013       | pexA |
| cmlA1_2_AB212941      | cmlA |
| fexA_1_AJ549214       | fexA |
| floR_1_AF071555       | floR |
| floR_2_AF118107       | floR |
| cfr_1_AM408573        | cfr  |
| cfr_1_AJ579365        | cfr  |
| QnrB58_1_JX259319     | QnrB |
| QnrB57_1_JX259318     | QnrB |
| QnrB6_3_EF523819      | QnrB |
| QnrA4_1_DQ058662      | QnrA |
| QnrA3_1_DQ058661      | QnrA |
| QnrB6_2_EF517946      | QnrB |
| QnrB16_1_EU136183     | QnrB |
| QnrB17_1_JN173051     | QnrB |
| QnrB70_1_KC580659     | QnrB |
| QnrB6_1_EF520349      | QnrB |
| QnrB72_1_KC741443     | QnrB |
| QnrA1_1_AY070235      | QnrA |
| QnrA2_1_HQ449669      | QnrA |

|                   |      |
|-------------------|------|
| QnrB14_1_EU273757 | QnrB |
| QnrB15_1_EU302865 | QnrB |
| QnrB23_1_FJ981622 | QnrB |
| QnrB24_1_HM192542 | QnrB |
| QnrB59_1_JX259320 | QnrB |
| QnrB5_1_DQ303919  | QnrB |
| QnrB60_1_AB734055 | QnrB |
| QnrB2_1_HM125698  | QnrB |
| QnrB2_2_DQ351242  | QnrB |
| QnrB30_1_HM439650 | QnrB |
| QnrB31_1_HQ418999 | QnrB |
| QnrB32_1_HQ704413 | QnrB |
| QnrB32_2_JN173054 | QnrB |
| QnrA5_1_DQ058663  | QnrA |
| QnrA6_1_DQ151889  | QnrA |
| QnrB71_1_KC580660 | QnrB |
| QnrB7_1_EU043311  | QnrB |
| QnrB8_1_EU043312  | QnrB |
| QnrB9_1_EF653270  | QnrB |
| QnrC_1_EU917444   | QnrC |
| QnrB12_2_AM774474 | QnrB |
| QnrB13_1_EU273755 | QnrB |
| QnrB13_1_JN173050 | QnrB |
| QnrB13_2_EU273756 | QnrB |
| QnrB44_1_JQ349153 | QnrB |
| QnrB45_1_JQ349152 | QnrB |
| QnrB46_1_JQ349154 | QnrB |
| QnrB17_2_AM919398 | QnrB |
| QnrB18_1_AM919399 | QnrB |
| QnrAS_1_FM178379  | QnrA |
| QnrB10_1_DQ631414 | QnrB |
| QnrB10_8_HM439644 | QnrB |
| QnrB11_1_EU136183 | QnrB |
| QnrB1_1_EF682133  | QnrB |
| QnrB1_2_DQ351241  | QnrB |
| QnrB20_1_AB379831 | QnrB |
| QnrB21_1_FJ611948 | QnrB |
| QnrB22_1_FJ981621 | QnrB |
| QnrB56_1_JX259317 | QnrB |
| QnrB69_1_KC580658 | QnrB |
| QnrB25_1_HQ172108 | QnrB |
| QnrB26_1_HM439644 | QnrB |
| QnrB27_1_HM439641 | QnrB |
| QnrB27_2_HM439642 | QnrB |

|                     |      |
|---------------------|------|
| QnrB28_1_HM439643   | QnrB |
| QnrB29_1_HM439649   | QnrB |
| QnrB29_2_JN173053   | QnrB |
| QnrB64_1_KC580653   | QnrB |
| QnrB65_1_KC580654   | QnrB |
| QnrB66_1_KC580655   | QnrB |
| QnrB67_1_KC580656   | QnrB |
| QnrB68_1_KC580657   | QnrB |
| QnrS1_1_GQ336885    | QnrS |
| QnrB33_1_JN173055   | QnrB |
| QnrB34_1_JN173056   | QnrB |
| QnrB35_1_JN173057   | QnrB |
| QnrB36_1_JN173058   | QnrB |
| QnrB37_1_JN173059   | QnrB |
| QnrB38_1_JN173060   | QnrB |
| QnrB3_1_DQ303920    | QnrB |
| QnrB40_1_JN166689   | QnrB |
| QnrB41_1_JN166690   | QnrB |
| QnrB42_1_JN680743   | QnrB |
| QnrB43_1_AFA52643   | QnrB |
| QnrS1_1_AB187515    | QnrS |
| QnrS4_1_FJ418153    | QnrS |
| QnrS2_1_JF261185    | QnrS |
| QnrS2_2_DQ485530    | QnrS |
| QnrS3_1_EU077611    | QnrS |
| QnrB50_1_JX440357   | QnrB |
| QnrB4_1_DQ303921    | QnrB |
| QnrB19_1_EU432277   | QnrB |
| QnrB19_1_HM146784   | QnrB |
| QnrB54_1_HE820727   | QnrB |
| QnrB51_1_JX440358   | QnrB |
| QnrB52_1_EF488762   | QnrB |
| QnrB53_1_HQ704413   | QnrB |
| QnrB61_1_AB734053   | QnrB |
| QnrB62_1_JX987101   | QnrB |
| QnrA7_1_GQ463707    | QnrA |
| QnrB48_1_JQ762640   | QnrB |
| QnrD_1_FJ228229     | QnrD |
| QnrD_2_HM056768     | QnrD |
| QnrVC3_1_HM015626   | QnrV |
| QnrVC4_1_GQ891757   | QnrV |
| QnrVC1_1_EU436855.2 | QnrV |
| qepA2_1_EU847537    | qepA |
| qepA_1_AB263754     | qepA |

|                     |        |
|---------------------|--------|
| QnrB47_1_JQ349155   | QnrB   |
| QnrS5_1_HQ631377    | QnrS   |
| QnrVC5_1_JN408080   | QnrV   |
| QnrB4_2_HM125703    | QnrB   |
| QnrS6_1_HQ631376    | QnrS   |
| QnrB49_1_JQ582718   | QnrB   |
| QnrB4_3_EF543140    | QnrB   |
| ARR-2_1_HQ141279    | ARR    |
| ARR-2_2_AF078527    | ARR    |
| ARR-3_1_JF806499    | ARR    |
| ARR-3_2_FJ459817    | ARR    |
| ARR-3_3_AJ277027    | ARR    |
| ARR-3_4_FM207631    | ARR    |
| ARR-4_1_EF660562    | ARR    |
| ARR-5_1_EF660563    | ARR    |
| ARR-6_1_FM955585    | ARR    |
| ARR-6_2_FM897214    | ARR    |
| ARR-6_3_JF922883    | ARR    |
| ARR-7_1_FN397623    | ARR    |
| vat(A)_1_L07778     | vat(A) |
| vat(B)_1_U19459     | vat(B) |
| vat(C)_1_AF015628   | vat(C) |
| vat(D)_1_L12033     | vat(D) |
| vat(D)_2_AF368302   | vat(D) |
| vat(E)_10_AY043212  | vat(E) |
| vat(E)_11_AY043213  | vat(E) |
| vat(E)_3_AF153312   | vat(E) |
| vat(E)_5_AJ488494   | vat(E) |
| vat(E)_6_AF242872   | vat(E) |
| vat(E)_7_AY043211   | vat(E) |
| vat(E)_8_AY043209   | vat(E) |
| vat(E)_9_AY043210   | vat(E) |
| vat(F)_1_AF170730   | vat(F) |
| vga(A)LC_1_GQ891882 | vga(A) |
| vga(A)_1_M90056     | vga(A) |
| vga(A)_2_FN546261   | vga(A) |
| vga(B)_1_U82085     | vga(B) |
| vga(C)_1_GQ205627   | vga(C) |
| vga(C)_2_NC_013034  | vga(C) |
| vga(E)_1_FR772051   | vga(E) |
| vgb(A)_1_M20129     | vgb(A) |
| vgb(B)_1_AF015628   | vgb(B) |
| sul2_8_AJ877041     | sul2   |
| sul2_9_FJ197818     | sul2   |

|                  |      |
|------------------|------|
| sul3_1_EU834941  | sul3 |
| sul3_2_AJ459418  | sul3 |
| sul3_3_AY047357  | sul3 |
| sul3_5_AB281182  | sul3 |
| sul3_6_AB281183  | sul3 |
| sul1_10_DQ143913 | sul1 |
| sul1_11_DQ914960 | sul1 |
| sul1_14_AJ517791 | sul1 |
| sul1_15_EF667294 | sul1 |
| sul1_16_EF667294 | sul1 |
| sul1_17_AM746675 | sul1 |
| sul1_18_AY260546 | sul1 |
| sul1_19_DQ125241 | sul1 |
| sul1_20_JF262165 | sul1 |
| sul1_21_AJ971344 | sul1 |
| sul1_22_AY115475 | sul1 |
| sul1_23_AJ621187 | sul1 |
| sul1_24_EU117158 | sul1 |
| sul1_25_AY878717 | sul1 |
| sul1_26_AY524415 | sul1 |
| sul1_27_GU562437 | sul1 |
| sul1_28_JN790946 | sul1 |
| sul1_29_AJ746361 | sul1 |
| sul1_2_CP002151  | sul1 |
| sul1_30_JF262178 | sul1 |
| sul1_31_AM040449 | sul1 |
| sul1_32_EF592571 | sul1 |
| sul1_33_AJ564903 | sul1 |
| sul1_3_EU855787  | sul1 |
| sul1_4_HQ713678  | sul1 |
| sul1_5_EU780013  | sul1 |
| sul1_6_EU855787  | sul1 |
| sul1_7_FJ715937  | sul1 |
| sul1_8_JN581942  | sul1 |
| sul1_9_AY963803  | sul1 |
| sul2_10_AM183225 | sul2 |
| sul2_11_AY232670 | sul2 |
| sul2_12_AF497970 | sul2 |
| sul2_13_AJ289135 | sul2 |
| sul2_14_AJ514834 | sul2 |
| sul2_15_FJ968160 | sul2 |
| sul2_16_FM179941 | sul2 |
| sul2_17_U57647   | sul2 |
| sul2_18_AJ830714 | sul2 |

|                    |        |
|--------------------|--------|
| sul2_19_AJ319822   | sul2   |
| sul2_1_AF542061    | sul2   |
| sul2_20_AJ830710   | sul2   |
| sul2_2_GQ421466    | sul2   |
| sul2_3_HQ840942    | sul2   |
| sul2_4_AY333434    | sul2   |
| sul2_5_AY524415    | sul2   |
| sul2_6_FN995456    | sul2   |
| sul2_7_HM486907    | sul2   |
| otr(A)_1_X53401    | otr(A) |
| otr(C)_1_AY509111  | otr(C) |
| tet(L)_7_D12567    | tet(L) |
| tet(L)_8_X60828    | tet(L) |
| tet(L)_9_AY081910  | tet(L) |
| ort(B)_2_AF061335  | otr(B) |
| tet(M)_11_JN846696 | tet(M) |
| tet(M)_12_FR671418 | tet(M) |
| tet(M)_13_AM990992 | tet(M) |
| tet(M)_10_EU182585 | tet(M) |
| tet(M)_2_X90939    | tet(M) |
| tet(M)_3_U08812    | tet(M) |
| tet(M)_4_X75073    | tet(M) |
| tet(M)_5_U58985    | tet(M) |
| tet(M)_6_M21136    | tet(M) |
| tet(M)_8_X04388    | tet(M) |
| tet(M)_9_X56353    | tet(M) |
| tet(O)_1_M18896    | tet(O) |
| tet(O)_2_M20925    | tet(O) |
| tet(O)_3_Y07780    | tet(O) |
| tet(Q)_1_L33696    | tet(Q) |
| tet(Q)_2_X58717    | tet(Q) |
| tet(Q)_3_U73497    | tet(Q) |
| tet(Q)_4_Z21523    | tet(Q) |
| tet(S)_1_DQ377340  | tet(S) |
| tet(S)_2_L09756    | tet(S) |
| tet(S)_3_X92946    | tet(S) |
| tet(T)_1_L42544    | tet(T) |
| tet(T)_2_AY660530  | tet(T) |
| tet(U)_1_U01917    | tet(U) |
| tet(V)_1_AF030344  | tet(V) |
| tet(W)_1_DQ060146  | tet(W) |
| tet(W)_2_AY049983  | tet(W) |
| tet(W)_4_AJ427422  | tet(W) |
| tet(W)_5_AJ427421  | tet(W) |

|                     |         |
|---------------------|---------|
| tet(W)_6_FN396364   | tet(W)  |
| tet(X)_1_GU014535   | tet(X)  |
| tet(X)_2_M37699     | tet(X)  |
| tet(X)_3_AB097942   | tet(X)  |
| tet(Y)_1_EF495198   | tet(Y)  |
| tet(Y)_5_AB089606   | tet(Y)  |
| tet(Z)_2_AF121000   | tet(Z)  |
| tet(Z)_3_AY222818   | tet(Z)  |
| tetA(P)_1_AB054980  | tetA(P) |
| tetA(P)_2_HQ399624  | tetA(P) |
| tetA(P)_3_L20800    | tetA(P) |
| tetA(P)_4_AB001076  | tetA(P) |
| tetB(P)_1_DQ366035  | tetB(P) |
| tetB(P)_3_NC_010937 | tetB(P) |
| tet(M)_1_X92947     | tet(M)  |
| tet(B)_4_AF326777   | tet(B)  |
| tet(B)_5_AJ277653   | tet(B)  |
| tet(C)_10_AY043299  | tet(C)  |
| tet(C)_1_NC_002109  | tet(C)  |
| tet(C)_2_NC_003123  | tet(C)  |
| tet(C)_5_NC_003213  | tet(C)  |
| tet(C)_6_Y19114     | tet(C)  |
| tcR_1_D38215        | tcR     |
| tet(30)_1_AF090987  | tet(30) |
| tet(31)_1_GQ283908  | tet(31) |
| tet(31)_2_AJ250203  | tet(31) |
| tet(32)_1_EU722333  | tet(32) |
| tet(32)_2_EF626943  | tet(32) |
| tet(33)_1_DQ077487  | tet(33) |
| tet(33)_2_AY255627  | tet(33) |
| tet(33)_3_DQ390458  | tet(33) |
| tet(34)_1_AB061440  | tet(34) |
| tet(35)_1_AF353562  | tet(35) |
| tet(36)_1_AJ514254  | tet(36) |
| tet(37)_1_AF540889  | tet(37) |
| tet(38)_1_AY825285  | tet(38) |
| tet(38)_2_FN433596  | tet(38) |
| tet(38)_3_FR821779  | tet(38) |
| tet(39)_2_EU495989  | tet(39) |
| tet(39)_2_EU495991  | tet(39) |
| tet(39)_3_DQ195075  | tet(39) |
| tet(40)_1_FJ158002  | tet(40) |
| tet(40)_2_FJ158002  | tet(40) |
| tet(40)_3_AM419751  | tet(40) |

|                           |         |
|---------------------------|---------|
| tet(41)_1_AY264780        | tet(41) |
| tet(42)_1_EU523697        | tet(42) |
| tet(43)_1_GQ244501        | tet(43) |
| tet(44)_1_NZ_ABDU01000081 | tet(44) |
| tet(44)_2_FN594949        | tet(44) |
| tet(A)_2_X00006           | tet(A)  |
| tet(A)_3_AY196695         | tet(A)  |
| tet(A)_4_AJ517790         | tet(A)  |
| tet(A)_5_AJ419171         | tet(A)  |
| tet(A)_6_AJ313332         | tet(A)  |
| tet(B)_3_AP000342         | tet(B)  |
| tet(E)_3_L06940           | tet(E)  |
| tet(E)_5_CP000645         | tet(E)  |
| tet(G)_1_AJ276217         | tet(G)  |
| tet(G)_2_AF133139         | tet(G)  |
| tet(G)_3_S52437           | tet(G)  |
| tet(G)_4_AF133140         | tet(G)  |
| tet(G)_5_AF071555         | tet(G)  |
| tet(C)_9_AY046276         | tet(C)  |
| tet(D)_1_AF467077         | tet(D)  |
| tet(D)_3_D16172           | tet(D)  |
| tet(D)_5_X65876           | tet(D)  |
| tet(E)_1_Y19116           | tet(E)  |
| tet(E)_2_EF471995         | tet(E)  |
| tet(K)_4_U38428           | tet(K)  |
| tet(K)_5_J01764           | tet(K)  |
| tet(L)_1_HM235948         | tet(L)  |
| tet(L)_2_M29725           | tet(L)  |
| tet(L)_4_M11036           | tet(L)  |
| tet(L)_5_D00006           | tet(L)  |
| tet(L)_6_X08034           | tet(L)  |
| tet(H)_1_Y16103           | tet(H)  |
| tet(H)_2_AJ245947         | tet(H)  |
| tet(H)_3_Y15510           | tet(H)  |
| tet(H)_4_U00792           | tet(H)  |
| tet(J)_1_ACLE01000065     | tet(J)  |
| tet(J)_2_AF038993         | tet(J)  |
| dfrB5_1_AY943084          | dfrB    |
| dfrA30_1_AM997279         | dfrA    |
| dfrG_1_AB205645           | dfrG    |
| dfrA21_1_AY552589         | dfrA    |
| dfrB6_1_DQ274503          | dfrB    |
| dfrA29_1_AM237806         | dfrA    |
| dfrA21_1_AM932669         | dfrA    |

|                    |       |
|--------------------|-------|
| dfrB8_1_GU295656   | dfrB  |
| dfrA22_1_HM173356  | dfrA  |
| dfrA23_1_AJ746361  | dfrA  |
| dfrB7_1_DQ993182   | dfrB  |
| dfrA8_1_U10186     | dfrA  |
| dfrA31_1_AB200915  | dfrA  |
| dfrA28_2_FM877476  | dfrA  |
| dfrD_1_Z50141      | dfrD  |
| dfrA33_1_FM957884  | dfrA  |
| dfrA3_1_J03306     | dfrA  |
| dfrA3b_1_AY878717  | dfrAb |
| dfrA5_1_X12868     | dfrA  |
| dfrA6_1_Z86002     | dfrA  |
| dfrA7_1_AJ419170   | dfrA  |
| dfrC_1_GU565967    | dfrC  |
| dfrC_1_Z48233      | dfrC  |
| dfrA18_1_AJ310778  | dfrA  |
| dfrA1_1_X00926     | dfrA  |
| dfrA1_25_AJ844287  | dfrA  |
| dfrK_1_FN377602    | dfrK  |
| dfrA32_1_GU067642  | dfrA  |
| dfrB3_1_FM877478   | dfrB  |
| dfrB3_1_X72585     | dfrB  |
| dfrB4_1_FM877484   | dfrB  |
| dfrA15b_1_AJ867237 | dfrAb |
| dfrA16_1_AF077008  | dfrA  |
| dfrA16_1_DQ316603  | dfrA  |
| dfrA16_1_FN561628  | dfrA  |
| dfrA27_1_FJ459817  | dfrA  |
| dfrA7_2_X58425     | dfrA  |
| dfrA7_3_HM999792   | dfrA  |
| dfrA10_1_L06418    | dfrA  |
| dfrA12_1_AB571791  | dfrA  |
| dfrK_4_FN677369    | dfrK  |
| dfrK_8_FN812951    | dfrK  |
| dfrA20_1_AJ605332  | dfrA  |
| dfrA15_1_HM449019  | dfrA  |
| dfrA15_1_Z83311    | dfrA  |
| dfrA26_1_AM403715  | dfrA  |
| dfrA24_1_AJ972619  | dfrA  |
| dfrA25_1_DQ267940  | dfrA  |
| dfrA17_1_FJ460238  | dfrA  |
| dfrA13_1_Z50802    | dfrA  |
| dfrA14_1_DQ388123  | dfrA  |

|                     |        |
|---------------------|--------|
| dfrA14_1_Z50805     | dfrA   |
| dfrA1_5_AJ238350    | dfrA   |
| dfrA7_1_JF806498    | dfrA   |
| dfrA1_2_AJ419168    | dfrA   |
| dfrA1_30_JQ690541   | dfrA   |
| dfrB2_1_DQ839391    | dfrB   |
| dfrA9_1_X57730      | dfrA   |
| dfrB1_2_U36276      | dfrB   |
| VanX-A_1_FJ866609   | VanA   |
| VanR-A_2_M97297     | VanA   |
| VanA-A_2_M97297     | VanA   |
| VanZ-A_1_FJ866609   | VanA   |
| VanS-A_2_M97297     | VanA   |
| VanY-A_2_M97297     | VanA   |
| VanZ-A_2_M97297     | VanA   |
| VanH-A_1_FJ866609   | VanA   |
| VanA-A_1_FJ866609   | VanA   |
| VanX-A_2_M97297     | VanA   |
| VanH-A_2_M97297     | VanA   |
| VanY-A_1_FJ866609   | VanA   |
| VanH-Ac1_6_DQ246438 | VanAc1 |
| VanX-Ac1_6_DQ246438 | VanAc1 |
| VanX-Ac2_7_AY618461 | VanAc2 |
| VanH-Ac2_7_AY618461 | VanAc2 |
| VanH-Ao1_8_AF060799 | VanAo1 |
| VanX-Ao1_8_AF060799 | VanAo1 |
| VanH-A(Bc)_7_Y15704 | VanAo2 |
| VanA-Ao2_6_HQ679900 | VanAo2 |
| VanH-Ao2_9_HQ679900 | VanAo2 |
| VanX-Ao2_9_HQ679900 | VanAo2 |
| VanR-B_1_AF192329   | VanB   |
| VanH-B_1_AF192329   | VanB   |
| VanA-B_1_AF192329   | VanB   |
| VanY-B_1_AF192329   | VanB   |
| VanW-B_1_AF192329   | VanB   |
| VanX-B_1_AF192329   | VanB   |
| VanS-B_1_AF192329   | VanB   |
| VanXY-C_5_EU151754  | VanC   |
| VanA-C_2_DQ022190   | VanC   |
| VanA-C_1_AF162694   | VanC   |
| VanR-C_2_DQ022190   | VanC   |
| VanA-C_3_EU151752   | VanC   |
| VanR-C_1_AF162694   | VanC   |
| VanR-C_3_EU151752   | VanC   |

|                    |      |
|--------------------|------|
| VanS-C_4_EU151753  | VanC |
| VanA-C_5_EU151754  | VanC |
| VanXY-C_4_EU151753 | VanC |
| VanT-C_3_EU151753  | VanC |
| VanA-C_4_EU151753  | VanC |
| VanXY-C_1_AF162694 | VanC |
| VanS-C_3_EU151752  | VanC |
| VanXY-C_2_DQ022190 | VanC |
| VanT-C_2_EU151752  | VanC |
| VanR-C_4_EU151753  | VanC |
| VanS-C_2_DQ022190  | VanC |
| VanXY-C_3_EU151752 | VanC |
| VanS-C_1_AF162694  | VanC |
| VanT-C_1_DQ022190  | VanC |
| VanT-C_1_AF162694  | VanC |
| VanH-D_3_AY082011  | VanD |
| VanX-D_2_AF175293  | VanD |
| VanS-D_3_AY489045  | VanD |
| VanH-D_2_AF175293  | VanD |
| VanX-D_3_AY082011  | VanD |
| VanH-D_4_AY489045  | VanD |
| VanX-D_1_AB242319  | VanD |
| VanY-D_4_AY489045  | VanD |
| VanA-D_4_AY489045  | VanD |
| VanX-D_4_AY489045  | VanD |
| VanR-D_1_AB242319  | VanD |
| VanS-D_2_AF175293  | VanD |
| VanY-D_2_AF175293  | VanD |
| VanA-D_2_AF175293  | VanD |
| VanH-D_1_AB242319  | VanD |
| VanR-D_4_AY489045  | VanD |
| VanR-D_2_AF175293  | VanD |
| VanY-D_3_AY082011  | VanD |
| VanA-D_3_AY082011  | VanD |
| VanS-D_1_AB242319  | VanD |
| VanA-D_1_AB242319  | VanD |
| VanR-D_3_AY082011  | VanD |
| VanY-D_1_AB242319  | VanD |
| VanH-E_1_AF155139  | VanE |
| VanA-E_1_AF155139  | VanE |
| VanX-E_1_AF155139  | VanE |
| VanY-F_1_AF155139  | VanF |
| VanS-F_1_AF155139  | VanF |
| VanZ-F_1_AF155139  | VanF |

|                     |       |
|---------------------|-------|
| VanR-F_1_AF155139   | VanF  |
| VanU-G_1_AY271782   | VanG  |
| VanW-G_1_AY271782   | VanG  |
| VanY-G_1_DQ212986   | VanG  |
| VanT-G_1_AY271782   | VanG  |
| VanXY-G_1_AY271782  | VanG  |
| VanA-G_1_AY271782   | VanG  |
| VanR-G_1_AY271782   | VanG  |
| VanS-G_1_AY271782   | VanG  |
| VanXY-L_1_EU250284  | VanL  |
| VanS-L_1_EU250284   | VanL  |
| VanA-L_1_EU250284   | VanL  |
| VanTr-L_1_EU250284  | VanL  |
| VanTm-L_1_EU250284  | VanL  |
| VanR-L_1_EU250284   | VanL  |
| VanA-M_1_FJ349556   | VanM  |
| VanY-M_1_FJ349556   | VanM  |
| VanH-M_1_FJ349556   | VanM  |
| VanR-M_1_FJ349556   | VanM  |
| VanS-M_1_FJ349556   | VanM  |
| VanX-M_1_FJ349556   | VanM  |
| VanYX-N_1_JF802084  | VanN  |
| VanS-N_1_JF802084   | VanN  |
| VanA-N_1_JF802084   | VanN  |
| VanR-N_1_JF802084   | VanN  |
| VanT-N_1_JF802084   | VanN  |
| VanXE-Pp_2_AF155139 | VanPp |
| VanHE-Pp_2_AF155139 | VanPp |
| VanE-Pp_2_AF155139  | VanPp |
| VanYF-Pp_2_AF155139 | VanPp |
| VanZF-Pp_2_AF155139 | VanPp |
| VanX-Pt_5_DQ018711  | VanPt |
| VanA-Pt_3_DQ018710  | VanPt |
| VanW-Pt_2_DQ018711  | VanPt |
| VanY-Pt_3_DQ018710  | VanPt |
| VanX-Pt_3_DQ018710  | VanPt |
| VanZ-Pt_3_DQ018710  | VanPt |
| VanH-Pt_5_DQ018711  | VanPt |
| VanZ-Pt_4_DQ018711  | VanPt |
| VanS-Pt_3_DQ018710  | VanPt |
| VanS-Pt_5_DQ018711  | VanPt |
| VanR-Pt_5_DQ018711  | VanPt |
| VanR-Pt_3_DQ018710  | VanPt |
| VanY-Pt_5_DQ018711  | VanPt |

|                     |        |
|---------------------|--------|
| VanA-Pt_5_DQ018711  | VanPt  |
| VanH-Pt_3_DQ018710  | VanPt  |
| VanS-Pt2_4_AY926880 | VanPt2 |
| VanX-Pt2_4_AY926880 | VanPt2 |
| VanA-Pt2_4_AY926880 | VanPt2 |
| VanY-Pt2_4_AY926880 | VanPt2 |
| VanH-Pt2_4_AY926880 | VanPt2 |
| VanR-Pt2_4_AY926880 | VanPt2 |
| VanX-Sc_1_AL939117  | VanSc  |
| VanH-Sc_1_AL939117  | VanSc  |
| ddlA2-Sc_2_AL939117 | VanSc  |
| nimA_1_X71444       | nimA   |
| nimF_1_AJ515145     | nimF   |
| nimH_1_FJ969397     | nimH   |
| nimI_1_FJ940883     | nimI   |
| nimE_1_AM042593     | nimE   |
| nimI_1_FJ940887     | nimI   |
| nimI_1_FJ940889     | nimI   |
| nimJ_1_NZ_JH815495  | nimJ   |
| nimE_1_AJ244018     | nimE   |
| nimB_1_X71443       | nimB   |
| nimC_1_X76948       | nimC   |
| nimD_1_X76949       | nimD   |
| nimI_1_FJ940884     | nimI   |
| nimI_1_FJ940886     | nimI   |

Identifiers to gene name and merged resistance class

### Resistance type

### Merged resistance class







































[illegible]

[illegible]



[illegible]

[illegible]

[illegible]







[illegible]

[illegible]

[illegible]

[illegible]

## Beta-lactam

## Beta-lactam

## Beta-lactam

Beta-lactam

Beta-lactam

## Beta-lactam

Beta-lactam

## Beta-lactam

## Beta-lactam

## Beta-lactam

## Beta-lactam

## Beta-lactam

Beta-lactam

Beta-lactam

Beta-lactam

Beta-lactam

Beta-lactam

Beta-lactam

## Aminoglycoside

## Aminoglycoside

## Aminoglycoside

Quinolone

## Quinolone

## Quinolone

## Fosfomicin





[illegible]







|                            |              |
|----------------------------|--------------|
| Quinolone resistance       | Quinolone    |
| Rifampicin resistance      | Rifampicin   |
| Streptogramin B resistance | MLS          |
| Sulphonamide resistance    | Sulphonamide |
| Sulphonamide resistance    | Sulphonamide |











[illegible]





[illegible]

## Supplementary Figures 1-4

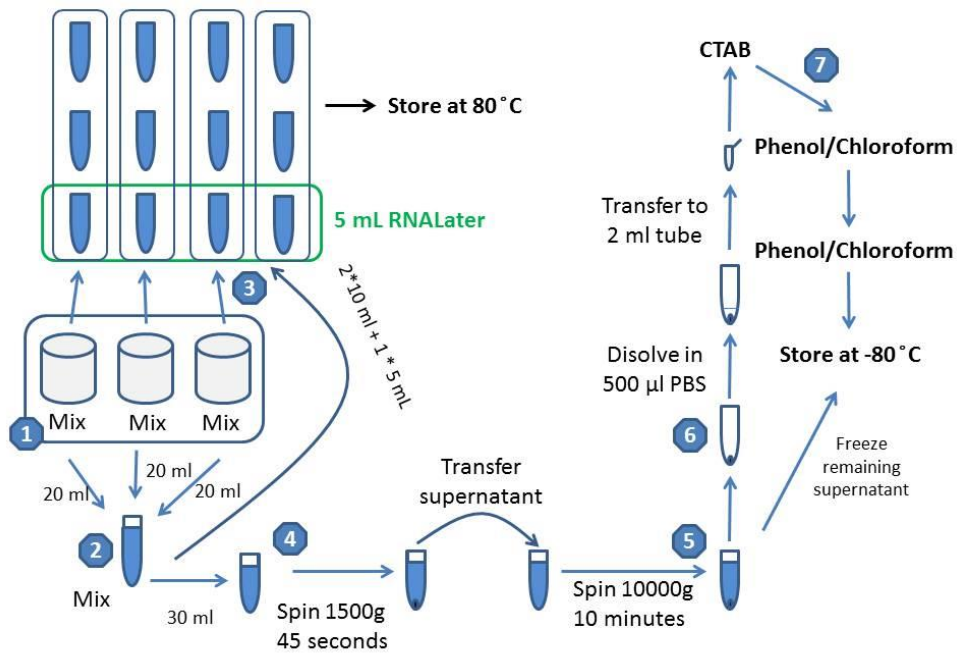

Supplementary Figure 1 Workflow for handling the air toilet samples.

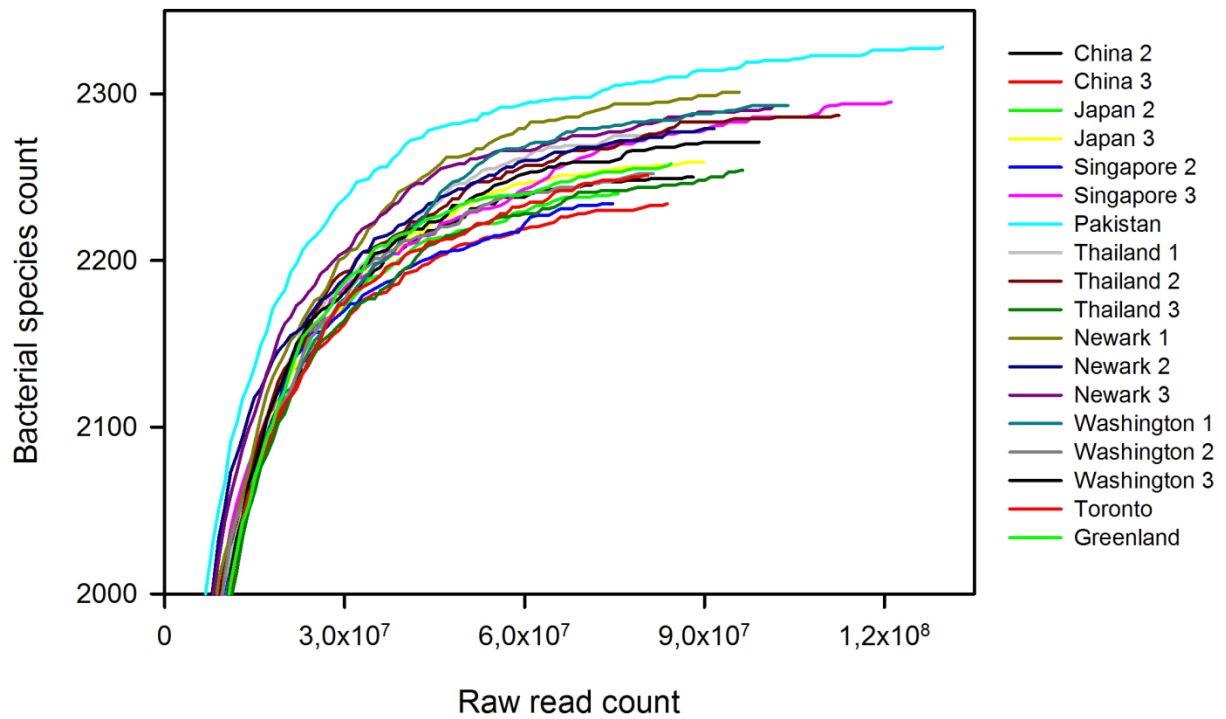

Supplementary Figure 2. Rarefaction curves of bacterial species found in the metagenomics samples. The rarefaction was done as number of new bacteria found as a result of the chain mapping procedure per raw reads mapped. Sampling was done for every 1 million reads.

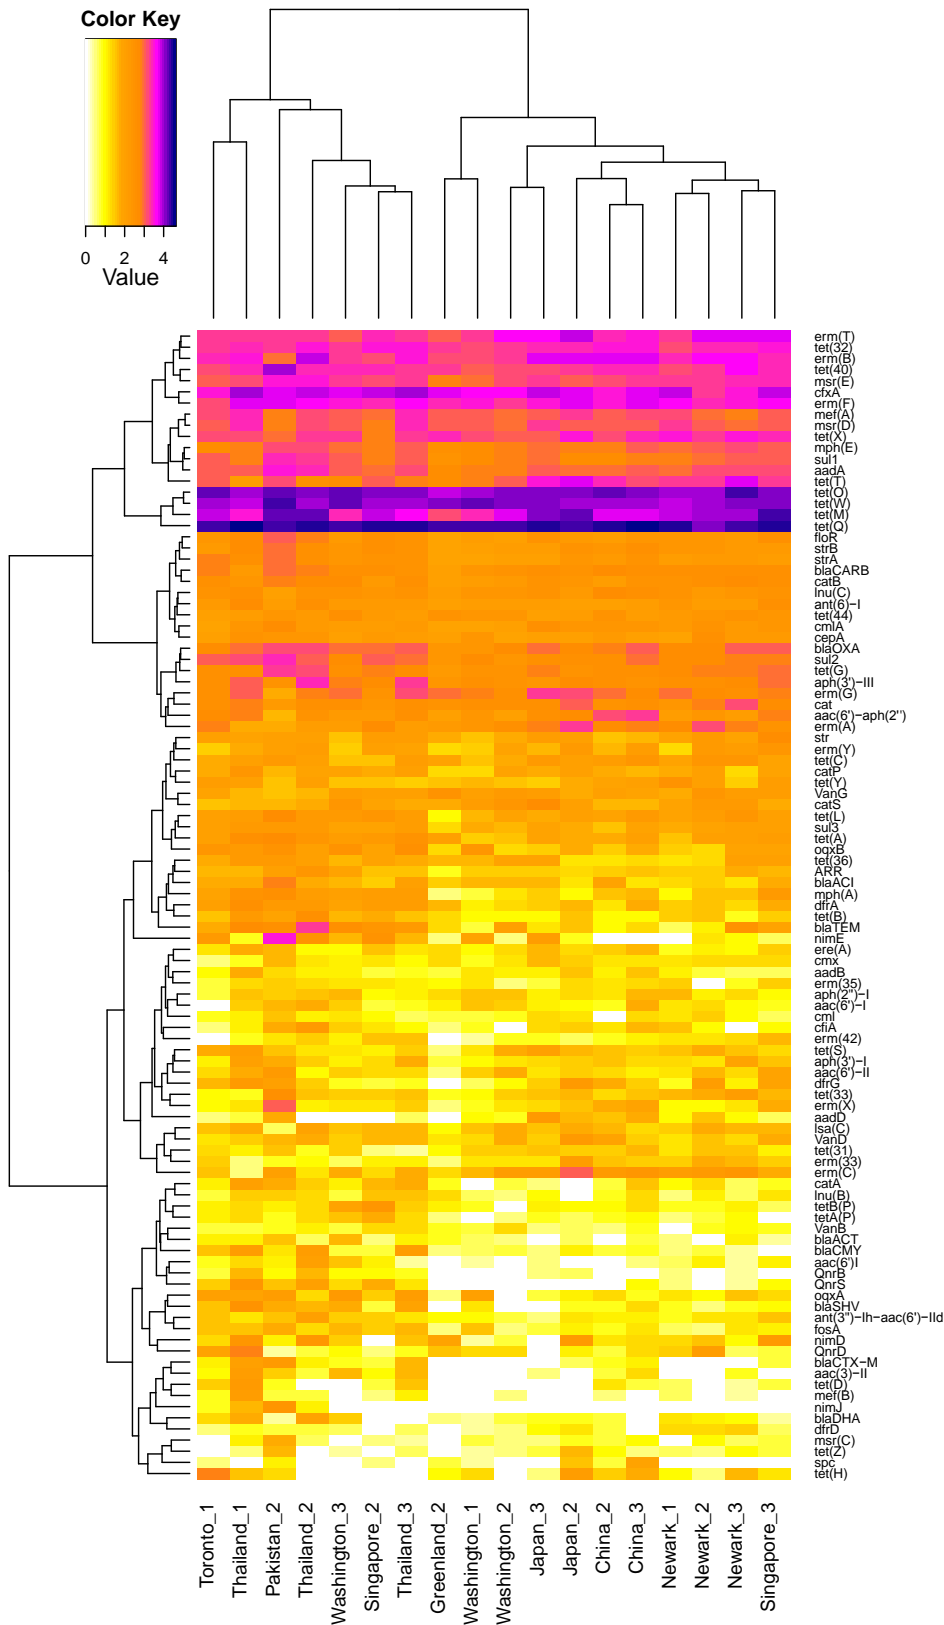

Supplemental Figure 3. Clustering of the 50% most abundant resistance genes and sample resistance gene profiles. The abundance is in log<sub>10</sub> scale from white (low), yellow, orange (intermediate), magenta, blue (high).

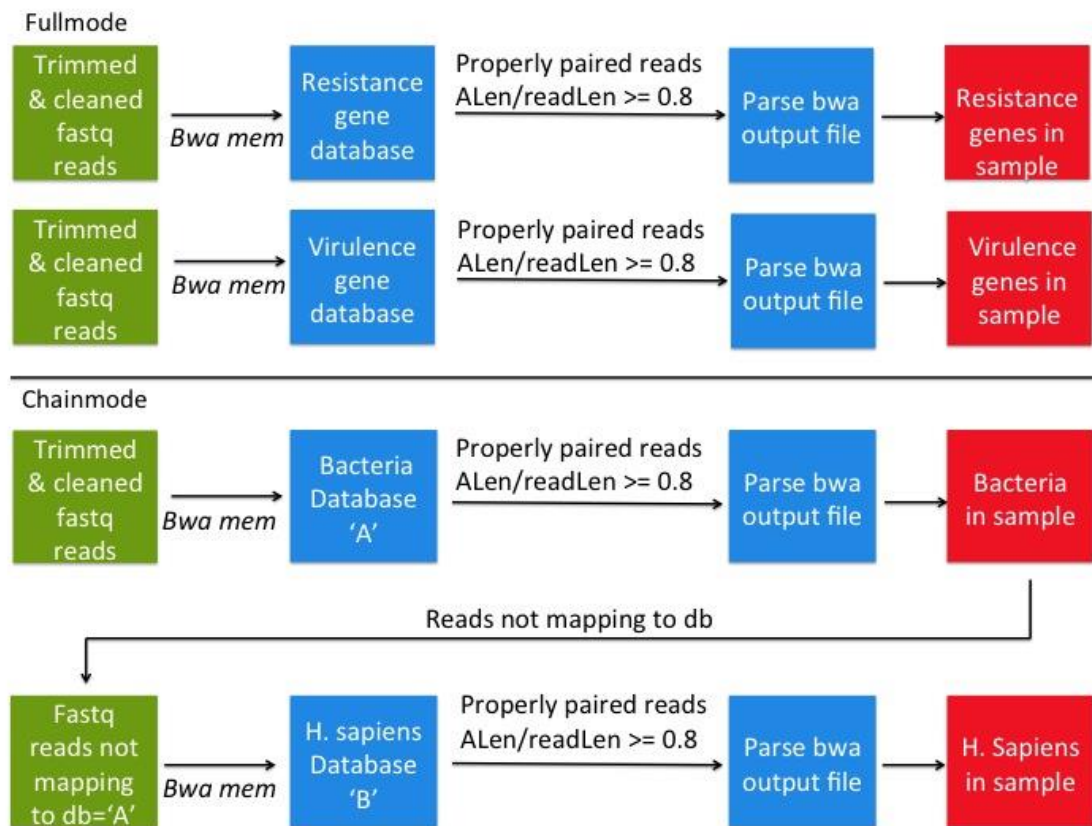

Supplementary Figure 4. The Fullmode and Chainmode methods are shown in top and bottom part of the figure, respectively. Trimmed and cleaned fastq reads is referred to as reads processed with cutadapt and subsequently only reads that can still be paired up are selected as a start set of fastq reads. In Fullmode that set is always the starting point for mapping against one or more reference sequence databases. In Chainmode, an ordered chain of databases is specified and reads not mapping to the first database, will get another chance to map to a database further down the chain. 'Alen', the alignment length is sum of matches 'M' which is extracted from the output of bwa in the so-called cigar strings where a match 'M' can be either an alignment match or a mis-match. If a read or its mate align to a database with an Alen/ReadLen below 80%, then both reads are discarded and enter the pool of unmapped reads that in Chainmode can be mapped against the next database in the chain.
